# Supplementary material
Source: PubMed Central journal article supplement (PMC5555387)

## Supplementary Information

### Supplementary Note

Study Descriptions

Pathway and network analyses

Further information on the new CAD gene regions

Acknowledgements

EPIC-CVD consortium study PIs

### Supplementary Tables

**Supplementary Table 1:** (a) Study-specific *sample* quality control exclusions and baseline characteristics of the studies with *de novo* genotyping. (b) Study-specific definitions of disease outcome (CAD).

**Supplementary Table 2:** Summary of study-specific *SNP genotype* quality control of the studies with *de novo* genotyping.

**Supplementary Table 3:** Inflation factors for the studies with *de novo* genotyping.

**Supplementary Table 4:** Results of CAD association tests from the European and All ancestry meta-analyses for SNPs with  $P < 5 \times 10^{-8}$  at the new loci.

**Supplementary Table 5:** Results of meta-analyses across the studies (including all samples) with *de novo* genotyping at the new CAD-associated SNPs reported in Supplementary Table 4.

**Supplementary Table 6** Summary of *P*-values for the null and associated sets used in the modified MAGENTA pathway analyses with the hypergeometric tests.

**Supplementary Table 7** Pathways with enrichment of CAD associated variants from the all ancestry meta-analyses identified using modified MAGENTA.

**Supplementary Table 8** Ingenuity pathway analysis results. (a) identified canonical pathways (b) identified upstream regulators.

**Supplementary Table 9** Co-ordinates for the genomics regions used for each new CAD locus

**Supplementary Table 10** eQTL look ups of the 15 new CAD-associated regions.

**Supplementary Table 11** Haploreg enrichment analyses of H3K27ac enhancer marks.

**Supplementary Table 12:** Association results for the established CAD loci.

### Supplementary Figures

**Supplementary Figure 1** QQ plots illustrating array-wide inflation for each of the studies with *de novo* genotyping.

**Supplementary Figure 2** Manhattan plot showing the association of ~79,000 variants with CAD from the European meta-analysis in up to ~221,000 individuals.

**Supplementary Figure 3** Forest plots from the all studies meta-analysis for the 15 sentinel CAD-associated SNPs.

**Supplementary Figure 4** Regional association plots for novel CAD associated loci (a) from the all ancestry meta-analysis for 13 loci and the European meta-analysis for *GOSR* and *SERPINH1*. (b) from the publicly available CARDIoGRAMplusC4D 1000G imputed GWAS results<sup>1</sup>.

**Supplementary Figure 5** Manhattan plot for the association of the Metabochip SNPs in the studies with *de novo* genotyping.

**Supplementary Figure 6** *SCARB1* regional association plots with (a) CAD (b) HDL<sup>2</sup> (c) LDL<sup>2</sup> and (d) triglycerides<sup>2</sup>. Physical position is given for GRCh37.

**Supplementary Figure 7** Annotation of the *SCARB1* region using publicly available transcriptomic and epigenomic reference data sets

**Supplementary Figure 8** Association of the PROCR gene region

## **Study descriptions**

Baseline characteristics of the contributing studies are summarized in **Supplementary Table 1**.

### **The Copenhagen Ischaemic Heart Disease Study (CIHDS)**

This study comprised 2,724 cases with myocardial infarction and other major acute coronary syndromes and 2,815 controls matched by age and sex from the Copenhagen General Population Study (CGPS) described below. The cases were recruited from Copenhagen University Hospital during the period from 1991 to 2009. In addition to a diagnosis of acute coronary syndrome, these cases also had stenosis or atherosclerosis on coronary angiography and/or positive results on exercise electrocardiography. Cases were classified by World Health Organization International Classification of Diseases-Eighth Revision, codes 410 to 414; International Classification of Diseases-Tenth Revision, codes I20 to I25, and through review of all hospital admissions and diagnoses entered in the national Danish Patient Registry and all causes of death entered in the national Danish Causes of Death Registry, as previously described<sup>3</sup>.

### **The Copenhagen General Population Study (CGPS)**

The CGPS is a population-based prospective study initiated in 2003 with ongoing enrolment<sup>3</sup>. Participants were selected on the basis of the national Danish Civil Registration System to reflect the adult Danish population age 20 to  $\geq 80$  years. Data were obtained from a questionnaire, a physical examination, and blood samples including deoxyribonucleic acid extraction. Follow-up was 100% complete; that is, no participant was lost to follow-up. As noted above, individuals free of coronary heart disease at the time of examination were selected to serve as controls for CIHDS (Copenhagen Ischemic Heart Disease Study).

### **Copenhagen City Heart Study (CCHS)**

CCHS is a population-based prospective study initiated in 1976 with follow-up examinations from 1981 to 1983, 1991 to 1994, and 2001 to 2003<sup>4</sup>. Selection of individuals for the CCHS was based on the same criteria as for the CGPS. Information on diagnosis of CAD (defined as WHO ICD 8 410 to 414 and WHO-ICD 10 I20 to I25) was collected and verified from 1976 until 2010 by reviewing all hospital admissions and diagnoses entered in the national Danish Patient Registry, and by reviewing all causes of death entered in the national Danish Causes of Death Registry<sup>4,5</sup>. Again, follow-up was 100% complete for both non-fatal coronary outcomes and mortality.

### **European Investigation into Cancer and Nutrition-CVD (EPIC-CVD)**

EPIC is a multi-centre prospective cohort study<sup>6</sup> of 519,978 participants (366,521 women and 153,457 men, mostly aged 35–70 years) recruited between 1992 and 2000 in 23 centres located in 10 European countries. Participants were invited mainly from population-based registers (Denmark, Germany, certain Italian centres, the Netherlands, Norway, Sweden, UK)<sup>7</sup>. Other sampling frameworks included: blood donors (Spain and Turin and Ragusa in Italy); screening clinic attendees (Florence in Italy and Utrecht in the Netherlands); people in health insurance programmes (France); and health conscious individuals (Oxford, UK)<sup>7</sup>. About 97% of the participants were of white European ancestry. Prevalent CAD was ascertained through self-reported history of MI or angina, or registry-ascertained CAD event prior to baseline. EPIC-CVD employs a nested case-cohort design, analogous to the EPIC-InterAct study for type-2 diabetes<sup>8</sup> which established a common set of referents through selection of a random sample of the entire cohort (“subcohort”). Incident CAD cases

have been defined as fatal and non-fatal MI and other major acute coronary events, according to ICD-10 codes I20-I25. All centres have recorded cause-specific mortality through mortality registries and/or active follow-up, and have ascertained and validated incident fatal and non-fatal CAD through a combination of methods (eg, morbidity registers, general practice records, MONICA registries, self-report, clinical records<sup>7</sup>).

### **Bangladesh Risk of Acute Vascular Events (BRAVE)**

BRAVE is a retrospective case-control study of first-ever confirmed acute myocardial infarction (MI) in Bangladesh. Patients (male or female; age between 30-80 years) admitted to the emergency rooms of the collaborating hospital in Dhaka, Bangladesh were eligible for inclusion as MI cases if they fulfilled all of the following criteria: i) presented within 24 hours of the onset of sustained clinical symptoms suggestive of MI lasting longer than 20 minutes, including chest pain and breathlessness; ii) had ECG changes indicative of MI (new pathologic Q waves, at least 1 mm ST elevation in any 2 or more contiguous limb leads or a new left bundle branch block, or new persistent ST-T wave changes diagnostic of a non-Q wave MI) with a subsequent confirmation by troponin-I measurements; and iii) had no previous cardiovascular diseases; defined as self-reported history of angina, MI, coronary revascularisation, transient ischaemic attack, stroke or evidence of CAD on prior ECG or in other medical records. Participants were not recruited into BRAVE if any of the following features had been evident: i) a previous history of cardiovascular disease (including self-reported MI, angina, coronary revascularization, stroke, transient ischaemic attack, or peripheral vascular disease, and, in cases, presence of cardiogenic shock); ii) a history of a viral or bacterial infection in the previous 2 weeks; iii) current hospitalization for acute cerebrovascular events; iv) MI secondary to any surgery; v) documented chronic conditions, such as malignancy, any chronic infection, leprosy, malaria or other bacterial/parasitic infections, chronic inflammatory disorders, hepatitis or renal failure on past medical history; vi) pregnancy or related conditions; or vii) unable to provide consent. Controls were hospital based and frequency-matched to cases on age (within 5 year age bands) and sex, and without a self-reported history of cardiovascular disease.

### **Pakistan Risk of Myocardial Infarction Study (PROMIS)**

PROMIS is an ongoing retrospective case-control study of first-ever confirmed acute MI in Pakistan. Since 2005, the study has enrolled close to 18,500 MI cases and equivalent number of controls; the present investigation has included all MI cases and controls that had been enrolled until 2011. Patients aged 30-80 years who were admitted to the emergency rooms of nine recruitment centres across Pakistan<sup>9</sup> were eligible for inclusion as cases if they fulfilled all of the following criteria: symptoms within 24 hours of hospital presentation; typical ECG changes; and positive troponin-I test. To identify referents from approximately the same source population as the cases, controls were identified contemporaneously in the same hospitals as the index cases and selected from among people who had no history of CVD and who were: visitors of patients attending the outpatient department; patients attending outpatient departments for routine non-cardiac complaints; or non-blood relatives visiting index MI cases. Controls were frequency-matched to MI cases by sex and age (5-year bands). People with recent illnesses or infections were not eligible.

### **ARIC**

The ARIC study is a multi-center cohort and community surveillance investigation in predominantly bi-racial populations (white and African Americans)<sup>10</sup>. ARIC recruited 15,792 individuals of which,

4,266 were African Americans. Individuals were aged 45-64 years and from four communities in Forsyth County, N.C., Jackson, M.S., Minneapolis, M.N., and Washington County, M.D. Baseline examination occurred between 1987-1989, with four follow-up examinations. Annual follow-up and community surveillance identified CAD events including hospitalizations and deaths which were then classified by an expert panel of physicians based on review of hospital records, death certificates and interviews of next of kin<sup>10</sup>. CAD events were defined as acute hospitalized MI (definitive or probable), definite fatal CAD, or ECG diagnosis of MI. Acute MI was defined based on criteria that included cardiac pain, cardiac markers and ECG readings. Events through December 31st, 2007 are included. After genotyping quality control and exclusion of prevalent CAD cases, 3204 African American participants 366 of which had incident CAD events were included in this study. All participants included in these analyses gave consent for genetic studies and data sharing.

## **WHI**

WHI is a prospective study investigating post-menopausal women's health in the U.S.<sup>11</sup>. A total of 161,838 women aged 50–79 years old were recruited from 40 US clinical centers between 1993 and 1998 to participate in an observational study (OS) and in three clinical trials (CT). Annual (OS) and semi-annual (CT) follow-up identified self-reported events which were then classified by an expert panel of physicians based on review of hospital records, death certificates and interviews of next of kin<sup>12</sup>. A subset of 2,200 WHI African American women was selected to be genotyped with the CardioMetaboChip by the Population Architecture using Genomics and Epidemiology (PAGE) study<sup>13</sup> investigators. Women were selected for genotyping on the basis of DNA and biomarker availability, and consent. CAD was defined as acute hospitalized MI (definitive or probable) and definite fatal CAD. Acute MI was defined based criteria that included cardiac pain, cardiac markers and ECG readings. Follow-up of events in WHI were through August 2009. The final sample after genotyping quality control and exclusion of prevalent self-reported CAD was up to 1954 with 99 incident CAD events. All participants included in these analyses gave consent for genetic studies and data sharing. Additional study descriptions are shown in Supplementary Table 1.

## **MIGen**

Involves a conglomerate of six MIGen studies focused exclusively on African American (AA) ancestry and included: 565 from Multi-ethnic Study of Atherosclerosis (MESA); 700 from the Cleveland Clinic GeneBank; 410 from the International Verapamil SR/Trandolapril Study (INVEST); 324 from Translational Research Investigating Underlying Disparities in Acute Myocardial Infarction Patients' Health Status (TRIUMPH); 469 from Penn Medicine Biobank, and 315 from Emory GeneBank.<sup>14</sup>

## **TAIwan metaboCHIp Consortium (TAICHI)**

The TAICHI consortium is formed of seven studies through a collaborative effort between investigators based in the U.S. and Taiwan. The main U.S academic sites participating in the TAICHI consortium include Stanford University School of Medicine in Stanford, California; Hudson-Alpha Biotechnology Institute in Huntsville, Alabama; and Harbor-UCLA in Los Angeles, California. The main academic sites in Taiwan include National Health Research Institute (NHRI); National Taiwan University Hospital (NTUH); Taipei and Taichung Veteran's General Hospitals (VGH) and Tri-Service General Hospital (TSGH). These investigators have assembled a large, well-phenotyped sample set consisting of >13,000 Han Chinese from seven existing studies<sup>15-19</sup>. The consortium aims to identify genetic determinants of atherosclerosis and diabetes related traits in East Asians and to fine map validated loci identified in other race/ethnic groups.

A majority of coronary artery disease (CAD) cases in TAI CHI were ascertained through hospital based studies enrolling subjects admitted for coronary angiography and/or clinical complications of CAD. These subjects were labelled as a case if a chart review by a qualified MD (most often a cardiologist) revealed that the subject either currently or in the past was suffering from a myocardial infarction, an acute coronary syndrome, angina, or demonstrated at least one epicardial coronary artery obstruction of >50% on coronary angiogram. A small minority of cases were identified among the non-hospital based prospective cohort studies through a self-report of either having suffered an MI, having undergone one or more procedures related to clinical complications of CAD, or having an ECG diagnostic of a prior q wave myocardial infarction or an ongoing ST-segment elevation MI based on the Minnesota Code<sup>20</sup>. Subjects who had no previous history of clinical CAD who were found to have sub-occlusive disease on angiogram (*i.e.* some evidence of atherosclerosis but no epicardial coronary artery obstruction of >50%) were excluded (*i.e.* they were neither considered a case or a control). All other subjects were considered controls.

1. **Taiwan Coronary Artery Disease GENetic (TCAGEN) study (PI - Dr. Jyh-Ming Juang)** is an ongoing cohort study that has been enrolling patients undergoing coronary angiography or percutaneous intervention at the National Taiwan University Hospital (NTUH) in the setting of either stable angina pectoris or prior myocardial infarction<sup>19</sup>. Participants are from both the north of Taiwan where the main NTU medical school/hospital is located, and from the Yulin branch of NTUH, located in south/central Taiwan. The hospital uses an elaborate electronic medical record system that provides access to clinic visit notes, diagnostic codes of clinic encounters, prescriptions, and laboratory data in a searchable form. Fasting blood samples were collected before cardiac catheterization while peripheral blood was collected in the catheter lab specifically for buffy coat isolation and DNA extraction.
2. **Taichung CAD (TCAD) study (PI - Dr. Wayne Huey-Herng Sheu)** includes patients with a variety of cardiovascular diseases receiving care at the Taichung Veterans General Hospital. Specifically, individuals who were hospitalized for diagnostic and interventional coronary angiography examinations and treatment are included in TAI CHI<sup>16</sup>. Also included in TAI CHI are subjects with a history of myocardial infarction or revascularization of any type (percutaneous coronary intervention or coronary artery bypass).
3. **Taiwan Coronary and Transcatheter intervention (TACT) cohort study (PI Dr. Tzung-Dau Wang)** enrolled patients with angina pectoris and objective documentation of myocardial ischemia who underwent diagnostic coronary angiography and/or revascularization any time after October 2000 at the National Taiwan University Hospital (NTUH)<sup>18</sup>. This cohort is very similar to TCAGEN but was collected independently. Participants provided clinically relevant information including use of cardiovascular related medication through a standardized questionnaire. Clinically relevant information is also available through a comprehensive electronic medical records database that includes information on drug use and surgical interventions. Fasting blood samples were collected before cardiac catheterization.
4. **Taiwan Diabetes and RelAted Genetic ComplicationN (Taiwan DRAGON) cohort study (PI - Dr. Wayne Huey-Herng Sheu)** of type 2 diabetes (T2D) at the Veteran's General Hospital in Taichung, Taiwan (Taichung VGH)<sup>17</sup>. Participants include individuals with either newly diagnoses or established diabetes who visit the diabetes outpatient clinic on a regular basis. Subjects with hyperglycemia who do not meet criteria for T2D defined by IDF are not included. Individuals participate in a health examination program at Taichung VGH are also interviewed. Specialized tests include an oral glucose tolerance tests (OGTT) in subjects without an established diagnosis of diabetes.

5. **Taiwan USA Diabetes Retinopathy (TUDR) cohort study (PI - Dr. Wayne Huey-Herng Sheu)** enrolled subjects with T2D receiving care at Taiching Veteran's General Hospital, a small number of subjects were included from Tri-Service General Hospital (TSGH)<sup>17</sup>. All TUDR subjects underwent a complete fundoscopic examination to carefully document the presence and extent of retinopathy. To date, a total of 2,222 unrelated T2D subjects with and without retinopathy were ascertained and have undergone metabochip genotyping. Of the 2,222 subjects, 1,201 were T2D without eye diseases, 479 were T2D with NPDR and 542 T2D with PDR. In addition to DNA and buffy coats, fasting blood for future measurement of serum/plasma biomarkers has also been banked. A variety of additional clinical related phenotypes are available. All 2,222 overlaps with the Taiwan Dragon Study.
6. **Healthy Aging Longitudinal Study in Taiwan (HALST) (PI – Dr. Agnes Chao Hsiung)** is a population based multi-site cohort study of ambulatory adults aged > 55 years living in 7 major geographic regions of Taiwan, established by the NHRI<sup>21</sup>. The aim of the study is to investigate the multidimensional determinants, including lifestyle, genetic, metabolic, and inflammatory factors, of an older Asian population. These 7 locations include both urban and rural areas: two are in the north (Taipei's Shilin District and Taoyuan County's Yangmei Township), two in central Taiwan (Miaoli City in Miaoli County and Changhua City in Changhua County), two in the south (Puzi, Chiayi County, and Kaohsiung's Lingya District), and one in the east (Hualien City/County). The only exclusion criteria are presence of highly contagious diseases, advanced illnesses with limited life span or bedridden status, dementia, other advanced neurological deficit, severe hearing loss, and institutionalization in a chronic care facility for any reason. Over 5000 subjects have been recruited over a five-year period (2008-2012) from seven recruitment sites across the country. Follow-up in person visits are currently ongoing and will continue throughout a second 5-year study cycle scheduled that began in 2013 (~1000 subjects / year). Within each wave, participants are to be followed up by telephone contact every year for vital status and for updates on health-related conditions. Medical records are requested to confirm the development of any new health conditions. Vital status, health claims, health care utilization data are being collected for the cohort on a regular basis by linking to the National Death Registry Database and the National Health Insurance Database. HALST served as one the main "control" cohorts for this study after exclusions of subjects with a self-report of CAD or a ECG diagnostic of prior MI.
7. **Stanford-Asian Pacific Program in Hypertension and Insulin Resistance (SAPPHIRE) family based study (PIs – Dr. Thomas Quertermous, Agnes Chao Hsiung, and Wayne Huey-Herng Sheu)** was established in 1995 with an initial goal of identifying major genetic loci underlying hypertension and insulin resistance through linkage in East Asian populations. SAPPHIRE was also one of four networks participating the NHLBI's Family Blood Pressure Program (FBPP)<sup>15</sup>. At the outset, SAPPHIRE involved recruitment sites in the San Francisco Bay Area, Hawaii, and Taiwan. However, a majority of the ~1,700 sibpairs in SAPPHIRE were recruited from 3 centers in Taiwan (NTUH, Taipei VGH and Taichung VGH) with NHRI being the DCC. Sibpairs were either highly concordant or discordant for blood pressure and a subset underwent an insulin suppression test. Many metabolic variables associated with blood pressure and insulin resistance were examined in the first 5-year investigative cycle funded by the NIH (1995-2000). Further extensive phenotyping through return visits and regular follow ups occurred between 2001 and 2008 in the Taiwanese SAPPHIRE participants which included echocardiographic and multi-detector row CT imaging procedures. These efforts were facilitated by a programmatic collaboration between the NHLBI's FBPP and the National Health Research Institute in Taiwan. Like

HALST, SAPPHiRe served predominantly as a “control” cohort in this study. Only one sib per family was included as a control in this study.

Two of the TAICHI studies (Taiwan DRAGON and TUDR) were T2D cohorts and so T2D cases that had been diagnosed with CAD were included as cases in the CAD analyses, while the remaining T2D samples were included as controls.

## Pathway and network analyses

### *Modified MAGENTA*

Given the Metabochip comprises a select set of SNPs and lacks complete genomic coverage<sup>22</sup>, MAGENTA, which assumes random sampling of variants from across the genome, could not be directly implemented. Therefore a modified version of MAGENTA involving a hypergeometric test to account for the chip design was used to test for pathways that were enriched with CAD associated variants<sup>23</sup>. This approach requires defining two sets of variants; a null set of variants that are not associated with CAD and a set that are associated with CAD, referred to as the “associated set”. Multiple variants can map to the same gene and still be included in the test. SNPs in LD were pruned out of the association results such that  $r^2 < 0.2$  for all pairs of SNPs (based on 1,000 Genomes Project data<sup>24</sup>; [www.1000genomes.org](http://www.1000genomes.org); Supplementary Table 6) prior to implementation of the modified MAGENTA. The null set was defined as the 1,000 remaining QT interval SNPs with the largest  $P$ -values (least evidence) for association with CAD. The associated set was defined as variants (after LD pruning) that showed evidence of association  $P < 1 \times 10^{-6}$ . This approach was adopted to select the null and associated sets so as to limit the number of variants included in the hypergeometric cumulative mass function, as a large number of variants results in an intractable calculation for the binomial coefficients. The observed  $P$ -value from the hypergeometric test is compared to the  $P$ -values obtained from 10,000 random sets to compute an empirical enrichment  $P$ -value.

An analysis of European, and all ancestry meta-analyses are reported. A total of 47,468 SNPs (of which 2,937 were QT interval SNPs) mapped to 11,190 genes and could be included in the European analysis, whilst 61,223 SNPs (3,403 of which were QT interval SNPs) mapped to 11,904 genes were included in the all ancestry analysis. Within the null set of the European analysis 873 genes were covered by the 1,000 null SNPs, whilst within the associated set 73 genes were covered by 76 SNPs. For the all ancestry analysis, 887 genes were covered by the 1,000 null SNPs and 78 genes were covered by 85 SNPs in the associated set. Sensitivity analyses to specific parameters used in the modified MAGENTA analyses were assessed. Sensitivity to the  $P$ -value threshold for inclusion in the associated set of variants was tested at  $P < 10^{-5}$ ,  $P < 10^{-7}$ ; the number of variants included in the null set of variants was set to 900 and 1,100; known CAD regions (identified in the NIH Catalog of Published Genome-Wide Association Studies, <https://www.genome.gov/26525384>) were removed; the newly identified CAD loci were removed; the *COL4A1* and *COL4A2* genes that appear in the associated sets for several enriched pathways were excluded and the number of random sets used to calculate the empirical enrichment  $P$ -value by was changed to 1,000 and 100,000 random sets.

Seven databases (BioCarta [www.biocarta.com/genes/index.asp](http://www.biocarta.com/genes/index.asp), Kyoto Encyclopedia of Genes and Genomes [KEGG], [www.genome.jp.kegg](http://www.genome.jp.kegg), Ingenuity, [www.ingenuity.com](http://www.ingenuity.com), Panther, Panther Biological Processes and Panther Molecular Functions [www.pantherdb.org](http://www.pantherdb.org), and Reactome, [www.reactome.org](http://www.reactome.org)) comprising 1,558 pathways, were tested for enrichment of genes associated with CAD. There were 23 pathways (18 independent) with  $P < 0.01$  from the European only pathway analysis and 19 pathways (16 independent) with  $P < 0.01$  from the all ancestry pathway analysis. (A more stringent significance threshold of  $p < 0.01$  was used rather than the more conventional  $P \leq 0.05$  so as to minimise the number of enriched pathways identified.) Ten pathways were in common between these analyses. Independence of pathways were determined by pathway gene content, if a pathway was a subset of another then it was deemed dependent. For example, the Reactome cell surface interactions at the vascular wall pathway (93 genes) is contained in the Reactome hemostasis pathway (272 genes). The chylomicron mediated lipid transport pathway (17 genes) is contained in the

Reactome lipoprotein metabolism pathway (27 genes), which is itself contained in the Reactome metabolism of lipids and lipoproteins pathway (228 genes).

The strongest evidence for enrichment in the European only analysis was for the KEGG glycerolipid metabolism pathway (49 genes,  $P < 3 \times 10^{-5}$ ). The strongest evidence for enrichment from the all ancestry analysis was shown by the Reactome lipoprotein metabolism pathway (27 genes,  $P < 3 \times 10^{-5}$ ). Generally pathways involved in lipid metabolism were the most enriched (11 of the 32 with  $P < 0.01$  in the European or all ancestry analysis).

The sensitivity analyses revealed that changing the number of random sets to 1,000 or 100,000 instead of 10,000 as used in the main analysis, resulted in the same pathways being identified in the European and the all ancestry analyses ( $P < 0.01$ ). Exclusion of *COL4A1/2* from the associated set resulted in fewer pathways being enriched, however, all but one of those enriched for the all ancestry pathway analysis were identified by the main analyses. Inclusion of less ( $P < 10^{-7}$ ) associated variants resulted in the loss of several pathways that were identified by the main analysis. Use of less associated variants ( $P < 1 \times 10^{-7}$ ) identified fewer pathways as expected, however, most of these were identified by the main analysis. A more liberal  $P$ -value threshold ( $P < 1 \times 10^{-5}$ ) for inclusion of variants in the associated set produced more enriched pathways than the main analysis, with most of the pathways identified by the main analysis being detected. The all ancestry sensitivity analysis with more associated variants detected several unique pathways. Use of less null variants ( $N=900$ ) generally identified the same pathways as the main analysis. However, inclusion of more variants in the null set ( $N=1,100$ ) resulted in an attenuation of pathways that were enriched. Most pathways identified under this sensitivity were detected by the main analysis. Removal of known and novel CAD loci generally resulted in less pathways being identified. The pathways found to be enriched from the sensitivity analyses that were not detected by the main analyses did not give additional insights into novel biological pathways involved with CAD. Three positive control pathways were also tested for enrichment of variants associated with CAD (Supplementary Table 7). The CAC and CAD pathways were significantly enriched for variants associated with CAD (CAC pathway  $P$ -value range:  $0.00$ - $1 \times 10^{-5}$ ; CAD pathway  $P = 0.00$  for all analyses).

### *Ingenuity pathway analyses*

We used the Core Analysis' function in the Ingenuity Pathway Analysis (IPA) software (Ingenuity Systems, Redwood City) to identify canonical pathways enriched with one or more SNPs with a low  $P$ -value in the all ancestry meta-analysis. IPA mapped 41,480 of the ~78,954 SNPs in our meta-analysis to ~8,894 RefSeq genes (*i.e.* the reference set of genes). Given the ~79,000 SNPs examined were primarily preselected candidate SNPs for association with CAD or its risk factors<sup>22</sup> and CAD has a complex genetic architecture the appropriate  $P$ -value cut-off to select SNPs for inclusion in the pathway analysis was unclear<sup>25,26</sup>. Therefore, six  $P$ -value thresholds ( $5 \times 10^{-7}$ ,  $5 \times 10^{-6}$ ,  $5 \times 10^{-5}$ , 0.0005, 0.005, and 0.05) were considered. The number of focus genes increased as the  $P$ -value threshold was lowered (76, 142, 228, 402, and 909, 2,439 for the six  $P$ -value thresholds). IPA uses a right-tailed Fisher Exact Test to test for statistically significant over-representation of focus genes in a given canonical pathway among the genes with SNPs with low  $P$ -values compared to the reference set of genes.

We also used the IPA to identify potential upstream regulators of genes with SNP(s) with low  $P$ -values

[[http://pages.ingenuity.com/rs/ingenuity/images/0812%20upstream\\_regulator\\_analysis\\_whitepaper.pdf](http://pages.ingenuity.com/rs/ingenuity/images/0812%20upstream_regulator_analysis_whitepaper.pdf)]. Upstream regulators were not necessarily represented by SNPs on the MetaboChip but could still be expected to play an important role in the pathogenesis of CAD.

The use of a liberal  $P$ -value thresholds in IPA revealed evidence of enrichment for the, sildenafil, PPAR $\alpha$ /RXR $\alpha$  Activation, Protein Kinase A signaling, and the Axonal Guidance Signaling pathways (Supplementary Table 8). We note analyses of the CARDIoGRAM GWAS data with only partial overlap with subjects examined here and using a different gene-set enrichment analysis algorithm also identified the axonal guidance pathways as relevant to CAD<sup>27</sup>. While axon guidance pathways modulate diverse biological phenomena within the nervous system, there is growing evidence that neural guidance cues play important roles outside the nervous system. For example, Netrin-1 is secreted by macrophage foam cells in atherosclerotic plaques and acts to inhibit emigration of these cells out of lesions by causing dysregulation of the actin cytoskeleton<sup>28</sup> and semaphorin 3A, expressed in coronary artery endothelial cells, potentially inhibits chemokine-directed migration of human monocytes<sup>29,30</sup>.

The tests for enrichment of genes associated with CAD<sup>23</sup> (Supplementary Tables 6 and 7) and analyses using the Ingenuity Pathway Analysis (IPA) software (Supplementary Table 8) identified known CAD associated pathways, such as metabolism of lipids and lipoproteins, farnesoid X receptor (FXR)/retinoid X receptor (RXR) activation and liver X receptor (LXR)/RXR activation. Evidence of enrichment using IPA with a  $P=0.05$  cut-off was obtained for a number of pathways including the PPAR $\alpha$ /RXR $\alpha$  Activation, and Protein Kinase A signaling pathways ( $P=3.98 \times 10^{-11}$  and  $3.16 \times 10^{-11}$ , respectively) which could indicate new areas of biology to investigate.

## Further information on the new CAD gene regions

### *ATP1B1*

The sentinel CAD associated SNP, rs1892094, is located at intron 3 of the *ATP1B1* gene, encoding for the Na<sup>+</sup>/K<sup>+</sup> ATPase beta subunit 1. Several GWASs have identified common variants at this locus associated with electrocardiographic parameters, including QT interval<sup>31-33</sup>. However, the implicated variants are not in LD with rs1892094 ( $r^2 < 0.2$ , 1000 Genomes EUR). The CAD SNP is however, associated with expression of *ATP1B1* in atherosclerotic root ( $P = 5.24 \times 10^{-24}$ )<sup>34</sup>. A recent study has reported an association of the region with pulse pressure<sup>35</sup> with a SNP (rs7519279) that is in LD with the CAD associated SNP ( $r^2 = 0.44$ ,  $D' = 0.98$  in 1000 Genomes EUR). In mouse, mutations in this gene have resulted in increased heart mass and cardiac hypertrophy, which could suggest a common mechanism. Together these findings make *ATP1B1* an interesting candidate gene.

Expression studies, however, also highlight *NME7* as a possible candidate. The CAD SNP rs1892094 is associated with *NME7* gene expression levels in LCLs ( $P = 4.82 \times 10^{-13}$ ) adipose ( $P = 9.46 \times 10^{-14}$ )<sup>36</sup>, aorta ( $P = 2.39 \times 10^{-14}$ )<sup>37</sup>, peripheral blood mononuclear cells ( $P = 7.98 \times 10^{-18}$ )<sup>38</sup> and monocytes ( $P = 1.1 \times 10^{-11}$ )<sup>39</sup>. *NME7* encodes the protein NME/NM23 family member 7 that is found in high abundance in many tissues including liver and kidney. However, there is no compelling cardiovascular phenotypes reported for this gene in mouse and its possible gene function with regards to the pathobiology of cardiovascular disease is elusive.

### *TNSI*

The non-synonymous CAD associated SNP, rs2571445 (W1197R) has previously been associated with pulmonary function<sup>40-42</sup>. Repapi et al. (ref<sup>40</sup>), also showed *TNSI* was expressed in lung tissue, bronchial epithelial cells, airway smooth muscle cells and peripheral blood mononuclear cells in human. The CAD risk allele is associated with increased expression of TNS1 in adipose ( $\beta = 0.12$ ,  $P = 8.88 \times 10^{-10}$ )<sup>36</sup> and peripheral blood ( $P = 1.81 \times 10^{-24}$ )<sup>43</sup>. The encoded protein is found in many tissues including smooth muscle cells and heart. Animal models have shown that this gene causes abnormal kidney morphology, kidney failure and abnormal renal glomerulus morphology and decreased renal plasma flow rate.

### *ARHGAP26*

The CAD risk allele, rs246600-T ( $P = 1.51 \times 10^{-8}$ ; OR[95%CI]=1.04[1.03-1.06]) maps to an intron of Rho GTPase-Activating Protein 26 (*ARHGAP26*) a region that has been associated with triglycerides, type 2 diabetes and BMI. These variants however are not in LD with rs246600, the CAD associated SNP. However, this gene remains a very interesting candidate because the protein encoded by this gene is a GTPase activating protein that binds to focal adhesion kinase (FAK), a protein involved in the signaling cascades that regulate the organization of the actin-cytoskeleton, and mediates the activity of the GTP binding proteins RhoA and Cdc42<sup>44</sup>, which represent proteins involved in the regulation and timing of cell division, morphology, migration and endocytosis. These processes may be relevant to the migration of fibroblasts and smooth muscle cells in the arterial vessel wall in response to the

deposition of vessel wall plaque as has been recently shown for the *TCF21* CAD susceptibility locus<sup>45</sup>.

### ***PARP12***

We have shown that rs10237377-T confers protection from CAD ( $P=1.75 \times 10^{-8}$ , OR[95% CI]=0.95[0.93-0.97]). This variant (or a tag  $r^2 > 0.8$ ) has not been associated with another trait as GWS to date but it is an eQTL for Thromboxane A Synthase 1 (*TBXAS1*) in whole blood ( $P=3.09 \times 10^{-71}$ )<sup>43</sup>. *TBXAS1*, catalyzes the conversion of the prostaglandin endoperoxide into thromboxane A2, a potent vasoconstrictor and inducer of platelet aggregation<sup>46</sup>. *TBXAS1*, has been implicated in reduction of CAD complications in a recent trial<sup>47</sup>. The gene has also been associated with thromboxane synthetase deficiency a rare bleeding disorder (OMIM). In mouse, mutations in *TBXAS1* have resulted in increased bleeding and decreased platelet aggregation. Together these findings suggest that *TBXAS1* could be a candidate causal gene in the region through platelet aggregation mechanisms.

### ***SERPINH1***

rs590121-T maps to an intron of *SERPINH1* and we show is associated with increased risk of CAD (Table 1; OR=1.05[1.03-1.07],  $P=1.54 \times 10^{-8}$ ). This SNP is in LD with rs6704 ( $D'=1$ ,  $r^2=0.86$ ) which is an eQTL for *SERPINH1* in whole blood ( $P=3.3 \times 10^{-22}$ ). This gene encodes a member of the serpin superfamily of serine proteinase inhibitors. The encoded protein is found in smooth muscle cells, is localized to the endoplasmic reticulum and plays a role in collagen biosynthesis as a collagen-specific molecular chaperone. Autoantibodies to the encoded protein have been found in patients with rheumatoid arthritis.

The CAD associated SNP is also an eQTL for a neighbouring gene, *GDPD5*, in whole blood ( $P=8.69 \times 10^{-10}$ )<sup>43</sup> and peripheral blood mononuclear cells ( $P=2.22 \times 10^{-14}$ )<sup>38</sup>, however, the LD between the CAD associated SNP and the top eQTL is low  $r^2 < 0.1$ . *GDPD5* protein is found in many tissues including liver and kidney.

### ***C12orf43/HNF1A***

The *C12orf43* region harbours three SNPs in the EUR studies and four in the all ancestry (five in total) that are associated with CAD at genome-wide significance (Supplementary Table 4). rs2258287, the sentinel SNP in EUR is located about 2Kb upstream of *C12orf43*. The A allele increases risk of CAD (OR[95% CI]=1.05[1.03-1.06],  $P=6 \times 10^{-9}$ ) and has previously been associated with increased LDL-C and total cholesterol levels ( $P=6.66 \times 10^{-17}$ )<sup>2</sup>.

rs2258287 is also associated in the all ancestry analyses ( $P=2.18 \times 10^{-8}$ ) however rs2244608 has a modestly smaller  $P$ -value ( $P=1.57 \times 10^{-8}$ ). These SNPs are not in LD in African ancestries ( $r^2=0.12$ ,  $D'=0.65$ , 1000G AFR), East Asians ( $r^2=0.14$ ,  $D'=0.8$ , 1000G) or South Asians ( $r^2=0.38$ ,  $D'=0.7$  1000G SAS) and are in moderate LD in Europeans ( $r^2=0.68$ ,  $D'=0.84$  in 1000G EUR). These SNPs or strong proxies ( $r^2 > 0.8$ ) were associated with decreased C-reactive protein ( $P=6.66 \times 10^{-17}$ )<sup>48,49</sup>, increased gamma glutamyltransferase levels ( $P=8.30 \times 10^{-38}$ )<sup>50</sup> and activity ( $P=6.66 \times 10^{-17}$ )<sup>51</sup>. rs2244608 is intronic in the *HNF1A* gene. *HNF1A* encodes hepatocyte nuclear factor 1 homeobox A, a transcription factor highly expressed in the

digestive system and liver, which regulates many genes involved in a wide range of biological processes, including lipid and glucose transport and metabolism, and coagulation pathways. However, *HNF1A* is perhaps better known as a gene containing low-frequency variants causing maturity onset diabetes of the young (MODY3), a Mendelian form of diabetes caused by low-frequency dominant mutations. A tightly correlated missense variant in *HNF1A* (rs1169288,  $r^2=0.96$ ,  $D'=0.99$  with rs2244608 in 1000G EUR) is predicted to have functional effects on *HNF1A*.

### ***SCARB1***

The CAD and HDL associations in the *SCARB1* region are likely to be independent as neither of our CAD associated SNPs in *SCARB1* (rs11057830 and rs11057841) were in LD with the sentinel HDL-C associated SNP, rs838880, ( $r^2=0.02$ ,  $D'=0.6$  in 1000 Genomes CEU samples; Supplementary Fig. 6).

To further test the CAD and HDL associations, the summary statistics for major lipids<sup>2</sup> (joint analysis of metabochip and GWAS data <http://csg.sph.umich.edu/abecasis/public/lipids2013/>) made available by the Global Lipids Genetics Consortium were downloaded and used for the conditional analyses at the *SCARB1* region. The association of rs11057830 with CAD remained after conditioning on the HDL signal ( $P=1.30 \times 10^{-8}$ ; note, rs838880, a SNP in strong LD with the sentinel HDL SNP,  $r^2=0.83$ ,  $D'=0.95$  in the 1000G CEU samples, was used as rs838876 was not genotyped on the Metabochip). The association of rs838876 with HDL remained ( $P=1.15 \times 10^{-35}$ ,  $\beta=-0.049$ ) after conditioning on the CAD associated SNP, rs11057830.

The unconditional associations of the above mentioned SNPs with CAD, HDL, LDL and TG.

|            | <b>CAD SNP<br/>rs11057830 A/G</b>   | <b>Reported HDL SNP<br/>rs838876 G/A</b> | <b>Metabochip Tag of<br/>HDL SNP rs838880<br/>T/C</b> | <b>Top TG SNP<br/>rs10846744 C/G</b> |
|------------|-------------------------------------|------------------------------------------|-------------------------------------------------------|--------------------------------------|
|            | <b><math>\beta</math> (P-value)</b> |                                          |                                                       |                                      |
| <b>CAD</b> | 0.0623 ( $1.34 \times 10^{-8}$ )    | --                                       | 0.0153 (0.055)                                        | 0.0524 ( $5.857 \times 10^{-7}$ )    |
| <b>HDL</b> | -0.0181 (0.0018)                    | -0.049 ( $7.33 \times 10^{-33}$ )        | -0.048 ( $6.38 \times 10^{-32}$ )                     | -0.0145 (0.009)                      |
| <b>LDL</b> | 0.0253 ( $2.58 \times 10^{-5}$ )    | 0.003 (0.44)                             | 0.0006 (0.88)                                         | 0.0253 ( $4.654 \times 10^{-5}$ )    |
| <b>TG</b>  | 0.0220 ( $8.34 \times 10^{-5}$ )    | 0.0052 (0.38)                            | 0.0059 (0.31)                                         | 0.0236 ( $2.218 \times 10^{-5}$ )    |

Note the effect allele/non-effect alleles are listed after the SNP name.

In contrast, there is no evidence of association in the region after conditioning on the top CAD SNP rs11057830, which is also the top LDL SNP, in this region and is in high LD with the top TG SNP rs10846744 ( $r^2=0.94$  in 1000 Genome phase 3 EUR samples). Given there is evidence of association with LDL-C and triglycerides at the CAD associated SNPs, this suggests that the *SCARB1* CAD association may be mediated via pro-atherogenic lipids.

### ***DHX38***

The *DHX38* region has previously been associated with increased total and LDL cholesterol<sup>52</sup>. Indeed, rs2000999-A, the cholesterol associated SNP, was associated with CAD in our data, but with less evidence ( $P=6.8 \times 10^{-7}$ , OR[95% CI]=1.04[1.03-1.06]) than the SNPs that map to *DHX38* and was not convincingly associated with CAD after conditioning on rs1050362 ( $P>0.001$ ). In addition to the cholesterol associations, the *DHX38* region has been reported to be associated with metabolites (tyrosine, phenylalanine/tyrosine ratio and glycoprotein)<sup>53,54</sup>, ischemic stroke<sup>55</sup>, atrial fibrillation<sup>56</sup> and Kawasaki disease<sup>57</sup>, however the SNPs involved are not in LD with the CAD associated SNPs ( $r^2<0.15$ ) suggesting these associations act through different causal pathways to the CAD association.

### ***GOSR2***

Within the *GOSR2* region, the CAD risk increasing allele rs17608766-C (OR[95% CI]=1.07[1.04-1.09]) has previously been reported to be associated with increased SBP<sup>58</sup> and increased pulse pressure.<sup>59</sup> It has also been associated with expression of *GOSR2* in liver<sup>60,61</sup> and reduced expression in brain, cerebellum and temporal cortex.<sup>62</sup> The association with CAD is likely to be through blood pressure and so the neighboring gene *WNT9B* also makes an interesting candidate. The kidney has an important role in blood pressure regulation. *WNT9B* protein shows highest expression in kidney (human protein atlas) and is implicated in kidney development. In mouse, mutation in the orthologous gene result in abnormal kidney development. Canonical Wnt9b signaling balances progenitor cell expansion and differentiation during kidney development.

### ***PROCR***

The CAD-associated SNP, rs867186 (or a SNP in strong LD  $r^2>0.8$  in 1000G EUR) is associated with expression of *PROCR* across a range of tissues including, atherosclerotic aortic root<sup>34</sup>, liver<sup>60</sup>, skin and subcutaneous adipose tissue<sup>36</sup> and transformed fibroblasts<sup>37</sup> (Supplementary Table 8, Supplementary Figure 8). While it is also in LD with the top eQTL for *EIF6*<sup>63</sup> and *ITGB4BP*<sup>39</sup> in monocytes, *PROCR* remains a plausible candidate gene for the CAD association.

The complexity underpinning the *PROCR* pathway is highlighted by its apparently paradoxical effects to reduce activity of the protein C pathway and increase risk of venous thrombosis, but *decrease* risk of CAD. Future studies will seek to elucidate this pathway, noting that previous studies have also highlighted a role of the EPCR in influencing vascular permeability and inflammation<sup>64</sup>, which may be independent of its thrombotic effects.

## References

1. CARDIoGRAMplusC4D Consortium. A comprehensive 1000 Genomes-based genome-wide association meta-analysis of coronary artery disease. *Nat Genet* **47**, 1121-30 (2015).
2. Global Lipids Genetics Consortium *et al.* Discovery and refinement of loci associated with lipid levels. *Nat Genet* **45**, 1274-83 (2013).
3. Nordestgaard, B.G., Benn, M., Schnohr, P. & Tybjaerg-Hansen, A. Nonfasting triglycerides and risk of myocardial infarction, ischemic heart disease, and death in men and women. *JAMA* **298**, 299-308 (2007).
4. Kamstrup, P.R., Tybjaerg-Hansen, A., Steffensen, R. & Nordestgaard, B.G. Genetically elevated lipoprotein(a) and increased risk of myocardial infarction. *JAMA* **301**, 2331-9 (2009).
5. Varbo, A. *et al.* Remnant cholesterol as a causal risk factor for ischemic heart disease. *J Am Coll Cardiol* **61**, 427-36 (2013).
6. Riboli, E. *et al.* European Prospective Investigation into Cancer and Nutrition (EPIC): study populations and data collection. *Public Health Nutr* **5**, 1113-24 (2002).
7. Danesh, J. *et al.* EPIC-Heart: the cardiovascular component of a prospective study of nutritional, lifestyle and biological factors in 520,000 middle-aged participants from 10 European countries. *Eur J Epidemiol* **22**, 129-41 (2007).
8. InterAct, C. *et al.* Design and cohort description of the InterAct Project: an examination of the interaction of genetic and lifestyle factors on the incidence of type 2 diabetes in the EPIC Study. *Diabetologia* **54**, 2272-82 (2011).
9. Saleheen, D. *et al.* The Pakistan Risk of Myocardial Infarction Study: a resource for the study of genetic, lifestyle and other determinants of myocardial infarction in South Asia. *Eur J Epidemiol* **24**, 329-38 (2009).
10. The Atherosclerosis Risk in Communities (ARIC) Study: design and objectives. The ARIC investigators. *Am J Epidemiol* **129**, 687-702 (1989).
11. Design of the Women's Health Initiative clinical trial and observational study. The Women's Health Initiative Study Group. *Control Clin Trials* **19**, 61-109 (1998).
12. Curb, J.D. *et al.* Outcomes ascertainment and adjudication methods in the Women's Health Initiative. *Ann Epidemiol* **13**, S122-8 (2003).
13. Matise, T.C. *et al.* The Next PAGE in understanding complex traits: design for the analysis of Population Architecture Using Genetics and Epidemiology (PAGE) Study. *Am J Epidemiol* **174**, 849-59 (2011).
14. Myocardial Infarction Genetics, C. *et al.* Genome-wide association of early-onset myocardial infarction with single nucleotide polymorphisms and copy number variants. *Nat Genet* **41**, 334-41 (2009).
15. Chang, Y.C. *et al.* Common ALDH2 genetic variants predict development of hypertension in the SAPHIRE prospective cohort: Gene-environmental interaction with alcohol consumption. *BMC Cardiovasc Disord* **12**, 58 (2012).
16. Liang, K.W. *et al.* Diabetes exacerbates angiographic coronary lesion progression in subjects with metabolic syndrome independent of CRP levels. *Clin Chim Acta* **388**, 41-5 (2008).
17. Lee, I.T., Huang, C.N., Lee, W.J., Lee, H.S. & Sheu, W.H. Aggravation of albuminuria by metabolic syndrome in type 2 diabetic Asian subjects. *Diabetes Res Clin Pract* **81**, 345-50 (2008).
18. Wang, T.D. *et al.* Association of epicardial adipose tissue with coronary atherosclerosis is region-specific and independent of conventional risk factors and intra-abdominal adiposity. *Atherosclerosis* **213**, 279-87 (2010).

19. Tsai, C.T. *et al.* Polygenetic regression model of renin-angiotensin system genes and the risk of coronary artery disease in a large angiographic population. *Clin Chim Acta* **412**, 619-24 (2011).
20. Prineas, R.J., Crow, R.S. & Blackburn, H.W. *The Minnesota code manual of electrocardiographic findings : standards and procedures for measurement and classification*, xiii, 328 p. (Springer, London, 2010).
21. Wu, I.C. *et al.* Association between dietary fiber intake and physical performance in older adults: a nationwide study in Taiwan. *PLoS One* **8**, e80209 (2013).
22. Voight, B.F. *et al.* The metabochip, a custom genotyping array for genetic studies of metabolic, cardiovascular, and anthropometric traits. *PLoS Genet* **8**, e1002793 (2012).
23. Segre, A.V. *et al.* Pathways targeted by antidiabetes drugs are enriched for multiple genes associated with type 2 diabetes risk. *Diabetes* **64**, 1470-83 (2015).
24. Genomes Project, C. *et al.* A map of human genome variation from population-scale sequencing. *Nature* **467**, 1061-73 (2010).
25. Speed, D., Hemani, G., Johnson, M.R. & Balding, D.J. Improved heritability estimation from genome-wide SNPs. *Am J Hum Genet* **91**, 1011-21 (2012).
26. Goldstein, B.A., Yang, L., Salfati, E. & Assimes, T.L. Contemporary Considerations for Constructing a Genetic Risk Score: An Empirical Approach. *Genet Epidemiol* **39**, 439-45 (2015).
27. Ghosh, S. *et al.* Systems Genetics Analysis of Genome-Wide Association Study Reveals Novel Associations Between Key Biological Processes and Coronary Artery Disease. *Arterioscler Thromb Vasc Biol* **35**, 1712-22 (2015).
28. Oksala, N. *et al.* Association of neuroimmune guidance cue netrin-1 and its chemorepulsive receptor UNC5B with atherosclerotic plaque expression signatures and stability in human(s): Tampere Vascular Study (TVS). *Circ Cardiovasc Genet* **6**, 579-87 (2013).
29. Wanschel, A. *et al.* Neuroimmune guidance cue Semaphorin 3E is expressed in atherosclerotic plaques and regulates macrophage retention. *Arterioscler Thromb Vasc Biol* **33**, 886-93 (2013).
30. van Gils, J.M. *et al.* Endothelial expression of guidance cues in vessel wall homeostasis dysregulation under proatherosclerotic conditions. *Arterioscler Thromb Vasc Biol* **33**, 911-9 (2013).
31. Pfeufer, A. *et al.* Common variants at ten loci modulate the QT interval duration in the QTSCD Study. *Nat Genet* **41**, 407-14 (2009).
32. Sano, M. *et al.* Genome-wide association study of electrocardiographic parameters identifies a new association for PR interval and confirms previously reported associations. *Hum Mol Genet* **23**, 6668-76 (2014).
33. Arking, D.E. *et al.* Genetic association study of QT interval highlights role for calcium signaling pathways in myocardial repolarization. *Nat Genet* **46**, 826-36 (2014).
34. Franzen, O. *et al.* Cardiometabolic risk loci share downstream cis- and trans-gene regulation across tissues and diseases. *Science* **353**, 827-30 (2016).
35. Hoffmann, T.J. *et al.* Genome-wide association analyses using electronic health records identify new loci influencing blood pressure variation. *Nat Genet* (2016).
36. Grundberg, E. *et al.* Mapping cis- and trans-regulatory effects across multiple tissues in twins. *Nat Genet* **44**, 1084-9 (2012).
37. GTEx Consortium. Human genomics. The Genotype-Tissue Expression (GTEx) pilot analysis: multitissue gene regulation in humans. *Science* **348**, 648-60 (2015).
38. Kirsten, H. *et al.* Dissecting the genetics of the human transcriptome identifies novel trait-related trans-eQTLs and corroborates the regulatory relevance of non-protein coding locidagger. *Hum Mol Genet* **24**, 4746-63 (2015).

39. Zeller, T. *et al.* Genetics and beyond--the transcriptome of human monocytes and disease susceptibility. *PLoS One* **5**, e10693 (2010).
40. Repapi, E. *et al.* Genome-wide association study identifies five loci associated with lung function. *Nat Genet* **42**, 36-44 (2010).
41. Soler Artigas, M. *et al.* Genome-wide association and large-scale follow up identifies 16 new loci influencing lung function. *Nat Genet* **43**, 1082-90 (2011).
42. Hancock, D.B. *et al.* Genome-wide joint meta-analysis of SNP and SNP-by-smoking interaction identifies novel loci for pulmonary function. *PLoS Genet* **8**, e1003098 (2012).
43. Westra, H.J. *et al.* Systematic identification of trans eQTLs as putative drivers of known disease associations. *Nat Genet* **45**, 1238-43 (2013).
44. Doherty, G.J. *et al.* The endocytic protein GRAF1 is directed to cell-matrix adhesion sites and regulates cell spreading. *Mol Biol Cell* **22**, 4380-9 (2011).
45. Nurnberg, S.T. *et al.* Coronary Artery Disease Associated Transcription Factor TCF21 Regulates Smooth Muscle Precursor Cells That Contribute to the Fibrous Cap. *PLoS Genet* **11**, e1005155 (2015).
46. Chase, M.B., Baek, S.J., Purtell, D.C., Schwartz, S. & Shen, R.F. Mapping of the human thromboxane synthase gene (TBXAS1) to chromosome 7q34-q35 by two-color fluorescence in situ hybridization. *Genomics* **16**, 771-3 (1993).
47. Kopylov, F.Y. *et al.* [Positive effect of low-activity thromboxane A synthase gene on prognosis in coronary heart disease]. *Ter Arkh* **87**, 59-65 (2015).
48. Shah, T. *et al.* Gene-centric analysis identifies variants associated with interleukin-6 levels and shared pathways with other inflammation markers. *Circ Cardiovasc Genet* **6**, 163-70 (2013).
49. Sabatti, C. *et al.* Genome-wide association analysis of metabolic traits in a birth cohort from a founder population. *Nat Genet* **41**, 35-46 (2009).
50. Chambers, J.C. *et al.* Genome-wide association study identifies loci influencing concentrations of liver enzymes in plasma. *Nat Genet* **43**, 1131-8 (2011).
51. Middelberg, R.P. *et al.* Loci affecting gamma-glutamyl transferase in adults and adolescents show age x SNP interaction and cardiometabolic disease associations. *Hum Mol Genet* **21**, 446-55 (2012).
52. Teslovich, T.M. *et al.* Biological, clinical and population relevance of 95 loci for blood lipids. *Nature* **466**, 707-13 (2010).
53. Inouye, M. *et al.* Novel Loci for metabolic networks and multi-tissue expression studies reveal genes for atherosclerosis. *PLoS Genet* **8**, e1002907 (2012).
54. Kettunen, J. *et al.* Genome-wide association study identifies multiple loci influencing human serum metabolite levels. *Nat Genet* **44**, 269-76 (2012).
55. Traylor, M. *et al.* Genetic risk factors for ischaemic stroke and its subtypes (the METASTROKE collaboration): a meta-analysis of genome-wide association studies. *Lancet Neurol* **11**, 951-62 (2012).
56. Ellinor, P.T. *et al.* Meta-analysis identifies six new susceptibility loci for atrial fibrillation. *Nat Genet* **44**, 670-5 (2012).
57. Burgner, D. *et al.* A genome-wide association study identifies novel and functionally related susceptibility Loci for Kawasaki disease. *PLoS Genet* **5**, e1000319 (2009).
58. International Consortium for Blood Pressure Genome-Wide Association Studies *et al.* Genetic variants in novel pathways influence blood pressure and cardiovascular disease risk. *Nature* **478**, 103-9 (2011).
59. Wain, L.V. *et al.* Genome-wide association study identifies six new loci influencing pulse pressure and mean arterial pressure. *Nat Genet* **43**, 1005-11 (2011).
60. Greenawalt, D.M. *et al.* A survey of the genetics of stomach, liver, and adipose gene expression from a morbidly obese cohort. *Genome Res* **21**, 1008-16 (2011).

61. Schadt, E.E. *et al.* Mapping the genetic architecture of gene expression in human liver. *PLoS Biol* **6**, e107 (2008).
62. Zou, F. *et al.* Brain expression genome-wide association study (eGWAS) identifies human disease-associated variants. *PLoS Genet* **8**, e1002707 (2012).
63. Fairfax, B.P. *et al.* Innate immune activity conditions the effect of regulatory variants upon monocyte gene expression. *Science* **343**, 1246949 (2014).
64. Danese, S., Vetrano, S., Zhang, L., Poplis, V.A. & Castellino, F.J. The protein C pathway in tissue inflammation and injury: pathogenic role and therapeutic implications. *Blood* **115**, 1121-30 (2010).

## Acknowledgements

The TAICHI study was supported by a grant from the NHLBI grant HL087647. The Taiwan Dragon (TAICHI) was supported by grants from National Science Council (NSC 98-2314-B-075A-002-MY3) and Taichung Veterans General Hospital, Taichung, Taiwan (TCVGH-1013001C;TCVGH-1013002D). The TCAD (TAICHI) was supported by grants from National Science Council (NSC 98-2314-B-075A-002-MY3) and Taichung Veterans General Hospital, Taichung, Taiwan (TCVGH-1013001C;TCVGH-1013002D). The SAPPHiRe (TAICHI) was supported by grants from National Health Research Institutes (BS-094-PP-01 & PH-100-PP-03). The HALST (TAICHI) was supported by grants from National Health Research Institutes (PH-100-SP-01)

The Population Architecture Using Genomics and Epidemiology (PAGE) program is funded by the National Human Genome Research Institute (NHGRI), supported by U01HG004803 (CALiCo), U01HG004798 (EAGLE), U01HG004802 (MEC), U01HG004790 (WHI), and U01HG004801 (Coordinating Center), and their respective NHGRI ARRA supplements. The complete list of PAGE members can be found at <http://www.pagestudy.org>.

The WHI program is funded by the National Heart, Lung, and Blood Institute, National Institutes of Health, U.S. Department of Health and Human Services through contracts N01WH22110, 24152, 32100-2, 32105-6, 32108-9, 32111-13, 32115, 32118-32119, 32122, 42107-26, 42129-32, and 44221. This manuscript was prepared in collaboration with investigators of the WHI, and has been approved by the WHI. WHI investigators are listed at [http://www.whiscience.org/publications/WHI\\_investigators\\_shortlist.pdf](http://www.whiscience.org/publications/WHI_investigators_shortlist.pdf).

The Atherosclerosis Risk in Communities Study is carried out as a collaborative study supported by National Heart, Lung, and Blood Institute contracts (HHSN268201100005C, HHSN268201100006C, HHSN268201100007C, HHSN268201100008C, HSN268201100009C, HHSN268201100010C, HHSN268201100011C, and HHSN268201100012C), R01HL087641, R01HL59367 and R01HL086694; National Human Genome Research Institute contract U01HG004402; and National Institutes of Health contract HHSN268200625226C. The authors thank the staff and participants of the ARIC study for their important contributions. Infrastructure was partly supported by Grant Number UL1RR025005, a component of the National Institutes of Health and NIH Roadmap for Medical Research.

JE funding is provided by the German Federal Ministry of Education and Research (BMBF) in the context of the e:Med program (e:AtheroSysMed and sysINFLAME) , the FP7 European Union project CVgenes@target (261123) and a grant from the Fondation Leducq (CADgenomics: Understanding Coronary Artery Disease Genes, 12CVD02. This study was also supported through the Deutsche Forschungsgemeinschaft (DFG) cluster of excellence ‘Inflammation at Interfaces’.

We are thankful to all the study participants in Pakistan. Recruitment in PROMIS was funded through grants available to investigators at the Center for Non-Communicable Diseases, Pakistan (Danish Saleheen and Philippe Frossard) and investigators at the University of Cambridge, UK (Danish Saleheen and John Danesh). Field-work, genotyping, and standard clinical chemistry assays in PROMIS were principally supported by grants awarded to the University of Cambridge from the British Heart Foundation, UK Medical Research Council,

Wellcome Trust, EU Framework 6-funded Bloodomics Integrated Project, Pfizer. We would like to acknowledge the contributions made by the following individuals who were involved in the field work and other administrative aspects of the study: Mohammad Zeeshan Ozair, Usman Ahmed, Abdul Hakeem, Hamza Khalid, Kamran Shahid, Fahad Shuja, Ali Kazmi, Mustafa Qadir Hameed, Naeem Khan, Sadiq Khan, Ayaz Ali, Madad Ali, Saeed Ahmed, Muhammad Waqar Khan, Muhammad Razaq Khan, Abdul Ghafoor, Mir Alam, Riazuddin, Muhammad Irshad Javed, Abdul Ghaffar, Tanveer Baig Mirza, Muhammad Shahid, Jabir Furqan, Muhammad Iqbal Abbasi, Tanveer Abbas, Rana Zulfiqar, Muhammad Wajid, Irfan Ali, Muhammad Ikhlq, Danish Sheikh and Muhammad Imran. The genetic and biomarker assays in this study (consumables and labour) were supported by grants from the British Heart Foundation (PG/09/035/27378), US National Institutes of Health (RC2HL101834 and RC1TW008485), Fogarty International Center (RC1TW008485), the Wellcome Trust (084711/Z/08/Z), and Pfizer, as well as by underpinning support from the UK Medical Research Council (MR/L003120/1), British Heart Foundation (RG/13/13/30194), and National Institute for Health Research Cambridge Biomedical Research Centre

We thank participants and staff of the Copenhagen City Heart Study, Copenhagen Ischemic Heart Disease Study, and the Copenhagen General Population Study for their important contributions.

CAD case ascertainment and validation, genotyping, and clinical chemistry assays in EPIC-CVD were principally supported by grants awarded to the University of Cambridge from the EU Framework Programme 7 (HEALTH-F2-2012-279233), the UK Medical Research Council (G0800270) and British Heart Foundation (SP/09/002), and the European Research Council (268834). We thank all EPIC participants and staff for their contribution to the study, the laboratory teams at the Medical Research Council Epidemiology Unit for sample management and Cambridge Genomic Services for genotyping, Sarah Spackman for data management, and the team at the EPIC-CVD Coordinating Centre for study coordination and administration.

The BRAVE study genetic epidemiology working group is a collaboration between the Cardiovascular Epidemiology Unit, Department of Public Health and Primary Care, University of Cambridge, UK, the Centre for Control of Chronic Diseases, icddr,b, Dhaka, Bangladesh and the National Institute of Cardiovascular Diseases, Dhaka, Bangladesh.

## EPIC-CVD consortium study PIs

Kim Overvad<sup>1,2</sup>, Anne Tjønneland<sup>3</sup>, Francoise Clavel-Chapelon<sup>4</sup>, Rudolf Kaaks<sup>5</sup>, Heiner Boeing<sup>6</sup>, Antonia Trichopoulou<sup>7,8</sup>, Pietro Ferrari<sup>9</sup>, Domenico Palli<sup>10</sup>, Vittorio Krogh<sup>11</sup>, Salvatore Panico<sup>12</sup>, Rosario Tumino<sup>13</sup>, Giuseppe Matullo<sup>14,15</sup>, Jolanda Boer<sup>16</sup>, Yvonne van der Schouw<sup>17</sup>, Elisabete Weiderpass<sup>18,19,20,21</sup>, J. Ramon Quiros<sup>22</sup>, María-José Sánchez<sup>23,24</sup>, Carmen Navarro<sup>25</sup>, Conchi Moreno-Iribas<sup>26</sup>, Larraitz Arriola<sup>27</sup>, Olle Melander<sup>28</sup>, Patrik Wennberg<sup>29</sup>, Nicholas J. Wareham<sup>30</sup>, Timothy J. Key<sup>31</sup>, Elio Riboli<sup>32</sup>, Adam S. Butterworth<sup>33,34</sup>, John Danesh<sup>33,34,35</sup>

1. Department of Public Health, Section for Epidemiology, Aarhus University, Aarhus, Denmark
2. Department of Cardiology, Aalborg University Hospital, Aalborg, Denmark
3. Diet, Genes and Environment, Danish Cancer Society Research Center, Copenhagen, Denmark
4. INSERM, Centre for Research in Epidemiology and Population Health (CESP), U1018, Nutrition, Hormones, and Women's Health Team, Institut Gustave Roussy, Villejuif, France
5. Division of Cancer Genetic Epidemiology, German Cancer Research Centre (DKFZ), im Neuenheimer Feld 581, 69120 Heidelberg, Germany
6. Department of Epidemiology, German Institute of Human Nutrition (DIfE), Potsdam-Rehbrücke, Germany
7. WHO Collaborating Center for Nutrition and Health, Unit of Nutritional Epidemiology and Nutrition in Public Health, Department of Hygiene, Epidemiology and Medical Statistics, University of Athens Medical School, Athens, Greece
8. Hellenic Health Foundation, Athens, Greece
9. International Agency for Research on Cancer, Lyon, France
10. Molecular and Nutritional Epidemiology Unit, Centro per lo Studio e la Prevenzione Oncologica-Scientific Institute of Tuscany, Florence, Italy
11. Epidemiology and Prevention Unit, Fondazione IRCCS Istituto Nazionale dei Tumori, Milan, Italy
12. Dipartimento di Medicina Clinica e Chirurgia, Federico II University, Naples, Italy
13. Cancer Registry and Histopathology Unit, Civic- M.P.Arezzo Hospital, ASP Ragusa, Italy
14. Human Genetics Foundation, Turin, Italy
15. Department of Medical Sciences, University of Turin, Italy
16. Centre for Nutrition, Prevention and Health Services, National Institute for Public Health and the Environment (RIVM), Bilthoven, the Netherlands
17. Julius Center for Health Sciences and Primary Care, University Medical Center Utrecht, Utrecht, the Netherlands
18. Department of Community Medicine, Faculty of Health Sciences, University of Tromsø, The Arctic University of Norway, Tromsø, Norway
19. Department of Research, Cancer Registry of Norway, Institute of Population-Based Cancer Research, Oslo, Norway
20. Department of Medical Epidemiology and Biostatistics, Karolinska Institutet, Stockholm, Sweden
21. Genetic Epidemiology Group, Folkhälsan Research Center, Helsinki, Finland
22. Public Health Directorate, Asturias, Spain
23. Escuela Andaluza de Salud Pública, Instituto de Investigación Biosanitaria

- ibs.GRANADA. Hospitales Universitarios de Granada/Universidad de Granada, Granada, Spain
24. CIBER de Epidemiología y Salud Pública (CIBERESP), Madrid, Spain
  25. Epidemiology Department, Murcia Health Authority, Murcia, Spain
  26. Public Health Institute of Navarra, Pamplona, Spain
  27. Public Health Division of Gipuzkoa, Instituto Bio-Donostia, Basque Government, CIBERESP, Spain
  28. Department of Clinical Sciences, Hypertension & Cardiovascular Disease, Clinical Research Centre, Malmö University Hospital, Malmö, Sweden
  29. Department of Public Health and Clinical Medicine, Family Medicine, Umeå University, Umeå, Sweden
  30. Medical Research Council Epidemiology Unit, University of Cambridge, Cambridge, UK
  31. Cancer Epidemiology Unit, Nuffield Department of Population Health, University of Oxford, UK
  32. School of Public Health, Imperial College London, UK
  33. Cardiovascular Epidemiology Unit, Department of Public Health & Primary Care, University of Cambridge, UK
  34. The National Institute for Health Research Blood and Transplant Unit (NIHR BTRU) in Donor Health and Genomics at the University of Cambridge, UK
  35. Wellcome Trust Sanger Institute, Genome Campus, Hinxton, UK

## Supplementary Tables

**Supplementary Table 1 (a)** Study-specific sample quality control exclusions and baseline characteristics of the studies with *de novo* genotyping. **(b)** Study-specific definitions of disease outcome (CAD).

| Collection         | Recruitment Country                                                    | Study design | Disease Outcome | N samples failed QC | N related samples removed | N ancestry outliers removed | N cases (% male) | N controls (% male) | Mean (SD) age               |
|--------------------|------------------------------------------------------------------------|--------------|-----------------|---------------------|---------------------------|-----------------------------|------------------|---------------------|-----------------------------|
| <b>European</b>    |                                                                        |              |                 |                     |                           |                             |                  |                     |                             |
| EPIC-CVD           | UK, Germany, Netherlands, Sweden, Norway, France, Spain, Greece, Italy | Case-cohort  | CAD             | 231                 | 475                       | 616                         | 11,391 (60) **   | 7,251 (35) **       | 59.3 (8.9) [56.5 (10.1)] *  |
| CCHS               | Denmark (Copenhagen)                                                   | Prospective  | CAD             | 122                 | 212                       | 13                          | 1,999 (52)       | 6,562 (42)          | 66.1 (10.8) [57.9 (15.1)] * |
| CIHDS              | Denmark (Copenhagen)                                                   | Case series  | ACS             | 106                 | 163                       | 8                           | 2,703 (73)       | NA                  | 60.4 (11.8) *               |
| CGPS               | Denmark (Copenhagen)                                                   | Prospective  | N/A             | 120                 | 58                        | 6                           | NA               | 2,803 (44)          | 58.0 (12.6)                 |
| <b>South Asian</b> |                                                                        |              |                 |                     |                           |                             |                  |                     |                             |
| PROMIS             | Pakistan (8 centres)                                                   | Case/Control | AMI             | 385                 | 264                       | 2                           | 5,833 (84) **    | 5,369 (81) **       | 53.2 (12.3)                 |

|                         |                    |              |     |     |       |    |            |            |                               |
|-------------------------|--------------------|--------------|-----|-----|-------|----|------------|------------|-------------------------------|
| BRAVE                   | Bangladesh (Dhaka) | Case/Control | AMI | 63  | 111   | 9  | 1,821 (88) | 1,645 (89) | 48.5 (15.9)                   |
| <b>African American</b> |                    |              |     |     |       |    |            |            |                               |
| ARIC (females)          | USA                | Prospective  | CAD | NA  | NA    | NA | 192 (0)    | 1840       | 53.3 (5.7)                    |
| ARIC (males)            | USA                | Prospective  | CAD | NA  | NA    | NA | 174 (100)  | 998        | 53.6 (6.0)                    |
| WHI                     | USA                | Prospective  | CAD | NA  | 0     | 2  | 99 (0)     | 1855       | 60.8 (6.8)                    |
| MIGen                   | USA                | Case/Control | CAD | 85  | 60    | 0  | 1,635 (NA) | 1,053 (NA) | NA                            |
| <b>East Asian</b>       |                    |              |     |     |       |    |            |            |                               |
| TAICHI                  | Taiwan             | Case/Control | CAD | 797 | 1,312 | 4  | 4,129 (78) | 6,369 (53) | 66.6 (11.3)<br>[64.4 (12.5)]* |

\*Mean age at diagnosis of CAD rather than baseline age at recruitment is given. \*\* These are the numbers of samples genotyped and passing QC. A subset of the PROMIS samples (3,704 CAD cases and 3,433 controls) and the EPIC-CVD samples (1,830 CAD cases and 449 controls) had been included in the CARDIoGRAMplusC4D discovery effort and were therefore not included in the meta-analyses with CARDIoGRAMplusC4D. Note, 21 samples were dropped from CIHDS and 12 from CGPS as they were identical to samples found in CCHS.

**Supplementary Table 1(b)**

| Study    | Case definition                                                                                                                                                                                       |
|----------|-------------------------------------------------------------------------------------------------------------------------------------------------------------------------------------------------------|
| MIGen    | CAD defined as acute myocardial infarction, >50% stenosis in coronary artery on coronary angiography, abnormal stress test, or unstable angina diagnosis                                              |
| ARIC     | CAD, defined as acute hospitalized MI (definitive or probable), definite fatal CAD, or ECG diagnosis of MI, validated by review of hospital records, death certificates and interviews of next of kin |
| BRAVE    | Acute MI within the preceding 24 hours                                                                                                                                                                |
| CCHS     | CAD, defined as ICD10 I20-I25, from morbidity and mortality registries                                                                                                                                |
| CGPS     | CAD, defined as ICD10 I20-I25, from morbidity and mortality registries                                                                                                                                |
| CIHDS    | MI or other major acute coronary syndromes plus stenosis or atherosclerosis on coronary angiography and/or positive results on exercise electrocardiography.                                          |
| EPIC-CVD | CAD, defined as ICD10 I20-I25, ascertained and validated through various methods (morbidity registers, general practice records, MONICA registries, self- report, clinical records)                   |
| PROMIS   | Acute MI within the preceding 24 hours                                                                                                                                                                |
| TAICHI   | CAD, defined as either currently or in the past suffering from an MI, an ACS, angina, or demonstrated at least one epicardial coronary artery obstruction of >50% on coronary angiogram.              |
| WHI      | CAD, defined as acute hospitalized MI (definitive or probable), definite fatal CAD, or ECG diagnosis of MI, validated by review of hospital records, death certificates and interviews of next of kin |

ACS = acute coronary syndrome; CAD = coronary artery disease; ECG = electrocardiogram; MI = myocardial infarction. Similar CAD definitions were used by the CARDIoGRAMplusC4D: Supplementary Table 2 of reference 3.

**Supplementary Table 2** Summary of study specific SNP genotype quality control for studies with *de novo* genotyping. The CardioMetabochip+ genotypes 209,818 SNPs, of which 209,529 map to the autosomes, while the CardioMetabochip includes 196,725 SNPs of which 196,479 map to the autosomes.

| Collection         | Genotyping<br>array | HWE <i>P</i> -<br>value<br>threshold | SNP call<br>rate<br>threshold | #SNPs with<br>no calls | #<br>monomorphi<br>c snps | Number of SNPs<br>removed call<br>rate/HWE/MAF<0.<br>01 | Number of<br>SNPs<br>passing<br>QC |
|--------------------|---------------------|--------------------------------------|-------------------------------|------------------------|---------------------------|---------------------------------------------------------|------------------------------------|
|                    |                     |                                      |                               |                        |                           |                                                         |                                    |
| <b>European</b>    |                     |                                      |                               |                        |                           |                                                         |                                    |
| EPIC-CVD           | CardioMetabo+       | $1 \times 10^{-6}$                   | 0.97                          | 1,403                  | 25,192                    | 48,322                                                  | 134,612                            |
| CCHS               | CardioMetabo+       | $1 \times 10^{-6}$                   | 0.97                          | 1,374                  | 37,152                    | 35,093                                                  | 135,910                            |
| CIHDS/CGPS         | CardioMetabo+       | $1 \times 10^{-6}$                   | 0.97                          | 1,387                  | 42,708                    | 29,307                                                  | 136,127                            |
| <b>South Asian</b> |                     |                                      |                               |                        |                           |                                                         |                                    |
| PROMIS             | CardioMetabo+       | $1 \times 10^{-6}$                   | 0.97                          | 1,149                  | 21,302                    | 55,491                                                  | 131,587                            |
| BRAVE              | CardioMetabo+       | $1 \times 10^{-6}$                   | 0.97                          | 1,019                  | 52,407                    | 25,485                                                  | 130,618                            |

|                             |              |                    |      |              |        |        |         |
|-----------------------------|--------------|--------------------|------|--------------|--------|--------|---------|
| <b>African<br/>American</b> |              |                    |      |              |        |        |         |
| ARIC (males)                | CardioMetabo | $1 \times 10^{-6}$ | 0.95 | NA           | NA     | NA     | 143,615 |
| ARIC<br>(females)           | CardioMetabo | $1 \times 10^{-6}$ | 0.95 | NA           | NA     | NA     | 143,473 |
| WHI                         | CardioMetabo | $1 \times 10^{-6}$ | 0.95 | NA           | NA     | NA     | 145,132 |
| MIGen                       | CardioMetabo | $1 \times 10^{-6}$ | 0.97 | 535          | 10,940 | 37,019 | 148,231 |
| <b>East Asian</b>           |              |                    |      |              |        |        |         |
| TAICHI                      | CardioMetabo | $1 \times 10^{-6}$ | 0.97 | 5,787 (<95%) | 46,543 | 39,092 | 105,834 |

**Supplementary Table 3** Inflation factors for studies with *de novo* genotyping. Lambda represents the inflation of the test statistics across all variants that passed QC in a study. Given that the CardioMetabochip was a customised genotyping array that included fine-mapping of previously established CAD loci and not a random selection of SNPs from across the genome, we also calculated inflation factors having excluded known CAD regions. The Lambda (noCAD) have had the variants that map to one of the 47 previously published CAD regions (or within 1Mb) of that region. QQ plots of the association statistics are provided in Supplementary Figure 1.

| Collection              | Association model | Lambda | Lambda (noCAD) | # PCs |
|-------------------------|-------------------|--------|----------------|-------|
| <b>European</b>         |                   |        |                |       |
| EPIC-CVD                | LMM               | 1.03   | 0.99           | 5     |
| CCHS                    | LMM               | 1.00   | 0.98           | 0     |
| CIHDS/CGPS              | LMM               | 1.05   | 0.99           | 1     |
| <b>South Asian</b>      | LMM               | 1.10   | 1.03           | 3     |
| PROMIS                  | Logistic          | 1.07   | 1.03           | 1     |
| BRAVE                   | Logistic          | 1.06   | 1.04           | 1     |
| <b>African American</b> |                   |        |                |       |
| WHI                     | Logistic          | 0.97   | 0.97           | 10    |
| MIGen                   | Logistic          | 1.06   | 1.05           | 10    |
| ARIC (males)            | Logistic          | 1.03   | 1.01           | 10    |
| ARIC (females)          | Logistic          | 1.04   | 1.04           | 10    |
| <b>East Asian</b>       |                   |        |                |       |
| TAICHI                  | LMM               | 1.09   | 1.05           | 5     |

LMM = linear mixed model as implemented in GEMMA. Logistic = logistic regression model

**Supplementary Table 4** Results of CAD association tests from the European and All ancestry meta-analyses for SNPs with  $P < 5 \times 10^{-8}$  at the new loci.

| Closest gene(s)       | SNP                    | Chr:Position        | Effect allele (AF)   | European collections    |                             |             | All collections         |                              |             |                |
|-----------------------|------------------------|---------------------|----------------------|-------------------------|-----------------------------|-------------|-------------------------|------------------------------|-------------|----------------|
|                       |                        |                     |                      | OR [95% CI]             | $P$                         | $P_{het}$   | OR [95% CI]             | $P$                          | $P_{het}$   | $\log_{10}B_F$ |
| <i>ATP1B1</i>         | rs1892094C>T           | 1:169094459         | T (0.50;0.48)        | <b>0.96 [0.94-0.97]</b> | <b>3.99x10<sup>-8</sup></b> | <b>0.86</b> | 0.96 [0.94-0.97]        | 2.25x10 <sup>-8</sup>        | 0.83        | 6.33           |
|                       | rs10919065G>T          | 1:169093557         | T (0.43;0.43)        | <b>1.05 [1.03-1.06]</b> | <b>1.57x10<sup>-8</sup></b> | <b>0.72</b> | 1.04 [1.02-1.05]        | 9.28x10 <sup>-7</sup>        | 0.11        | 5.06           |
|                       | rs1200159C>T           | 1:169100241         | T (0.43;0.42)        | <b>1.05 [1.03-1.06]</b> | <b>3.40x10<sup>-8</sup></b> | <b>0.72</b> | 1.04 [1.02-1.05]        | 1.90x10 <sup>-6</sup>        | 0.20        | 4.68           |
| <i>DDX59/CAMSAP2</i>  | rs6700559C>T           | 1:200646073         | T (0.47;0.47)        | <b>0.96 [0.94-0.97]</b> | <b>2.50x10<sup>-8</sup></b> | <b>0.14</b> | 0.96 [0.95-0.97]        | 1.13x10 <sup>-8</sup>        | 0.51        | 6.68           |
| <i>LMOD1</i>          | rs2820315C>T           | 1:201872264         | T (0.30;0.29)        | <b>1.05 [1.03-1.07]</b> | <b>4.14x10<sup>-9</sup></b> | <b>0.01</b> | 1.05 [1.03-1.07]        | 7.70x10 <sup>-10</sup>       | 0.02        | 7.72           |
|                       | rs2819348T>C           | 1:201884952         | C (0.34;0.33)        | <b>1.05 [1.03-1.06]</b> | <b>2.83x10<sup>-8</sup></b> | <b>0.02</b> | 1.05 [1.03-1.06]        | 1.77x10 <sup>-8</sup>        | 0.01        | 6.42           |
| (nsSNP) <i>TNSI</i>   | rs2571445G>A           | 2:218683154         | A (0.39;0.39)        | 1.04 [1.02-1.06]        | 3.58x10 <sup>-6</sup>       | 0.86        | <b>1.05 [1.03-1.06]</b> | <b>4.55x10<sup>-10</sup></b> | <b>0.01</b> | <b>8.41</b>    |
| <i>ARHGAP26</i>       | rs246600C>T            | 5:142516897         | T (0.48;0.46)        | <b>1.05 [1.03-1.06]</b> | <b>1.29x10<sup>-8</sup></b> | <b>0.41</b> | 1.04 [1.03-1.06]        | 1.51x10 <sup>-8</sup>        | 0.36        | 6.39           |
| <i>PARP12</i>         | rs10237377G>T          | 7:139757136         | T (0.35;0.38)        | 0.95 [0.93-0.97]        | 1.70x10 <sup>-7</sup>       | 0.13        | <b>0.95 [0.93-0.97]</b> | <b>1.74x10<sup>-8</sup></b>  | <b>0.34</b> | <b>6.32</b>    |
| <i>PCNX3</i>          | rs12801636G>A          | 11:65391317         | A (0.23;0.25)        | 0.95 [0.93-0.97]        | 1.00x10 <sup>-7</sup>       | 0.22        | <b>0.95 [0.94-0.97]</b> | <b>9.72x10<sup>-9</sup></b>  | <b>0.48</b> | <b>6.64</b>    |
| <i>SERPINH1</i>       | rs590121G>T            | 11:75274150         | T (0.30;0.31)        | <b>1.05 [1.03-1.07]</b> | <b>1.54x10<sup>-8</sup></b> | <b>0.47</b> | 1.04 [1.03-1.06]        | 9.32x10 <sup>-8</sup>        | 0.05        | 5.80           |
| <i>C12orf43/HNF1A</i> | <b>rs2258287C&gt;A</b> | <b>12:121454313</b> | <b>A (0.34;0.37)</b> | <b>1.05 [1.03-1.06]</b> | <b>6.00x10<sup>-9</sup></b> | <b>0.10</b> | 1.04 [1.03-1.06]        | 2.18x10 <sup>-8</sup>        | 0.13        | 6.40           |
|                       | rs2708081C>T           | 12:121463288        | T (0.48;0.47)        | <b>0.96 [0.94-0.97]</b> | <b>1.02x10<sup>-8</sup></b> | <b>0.32</b> | 0.96 [0.95-0.98]        | 1.56x10 <sup>-7</sup>        | 0.28        | 4.99           |
|                       | rs3213545G>A           | 12:121471337        | A (0.31;0.32)        | <b>1.04 [1.03-1.07]</b> | <b>2.50x10<sup>-8</sup></b> | <b>0.22</b> | 1.04 [1.03-1.06]        | 4.81x10 <sup>-8</sup>        | 0.43        | 6.13           |

|                      |                        |                     |                      |                         |                             |             |                         |                             |             |             |
|----------------------|------------------------|---------------------|----------------------|-------------------------|-----------------------------|-------------|-------------------------|-----------------------------|-------------|-------------|
|                      | <b>rs2244608A&gt;G</b> | <b>12:121416988</b> | <b>G (0.34;0.34)</b> | 1.04 [1.03-1.06]        | 1.96x10 <sup>-7</sup>       | 0.30        | <b>1.04 [1.03-1.06]</b> | <b>1.57x10<sup>-8</sup></b> | <b>0.71</b> | <b>6.42</b> |
|                      | rs1169288A>C           | 12:121416650        | C (0.34;0.34)        | 1.05 [1.03-1.06]        | 3.44x10 <sup>-7</sup>       | 0.20        | <b>1.05 [1.03-1.06]</b> | <b>4.53x10<sup>-8</sup></b> | <b>0.68</b> | <b>5.94</b> |
| <i>SCARB1</i>        | rs11057830G>A          | 12:125307053        | A (0.16;0.15)        | <b>1.07 [1.05-1.10]</b> | <b>5.65x10<sup>-9</sup></b> | <b>0.56</b> | 1.06 [1.04-1.09]        | 1.34x10 <sup>-8</sup>       | 0.78        | 6.49        |
|                      | rs11057841C>T          | 12:125316743        | T (0.15;0.16)        | <b>1.07 [1.04-1.09]</b> | <b>1.19x10<sup>-8</sup></b> | <b>0.60</b> | 1.05 [1.03-1.08]        | 7.52x10 <sup>-7</sup>       | 0.23        | 4.92        |
| <i>OAZ2/RBPMS2</i>   | rs6494488A>G           | 15:65024204         | G (0.18;0.21)        | 0.95 [0.93-0.97]        | 1.43x10 <sup>-6</sup>       | 0.44        | <b>0.95 [0.93-0.97]</b> | <b>2.09x10<sup>-8</sup></b> | <b>0.50</b> | <b>6.41</b> |
| <i>DHX38</i>         | rs1050362C>A           | 16:72130815         | A (0.38;0.39)        | 1.04 [1.03-1.06]        | 2.32x10 <sup>-7</sup>       | 0.59        | <b>1.04 [1.03-1.06]</b> | <b>3.52x10<sup>-8</sup></b> | <b>0.60</b> | <b>6.16</b> |
|                      | rs2072142C>T           | 16:72132713         | T (0.37;0.38)        | 1.05 [1.03-1.06]        | 2.44x10 <sup>-7</sup>       | 0.66        | <b>1.05 [1.03-1.06]</b> | <b>4.26x10<sup>-8</sup></b> | <b>0.65</b> | <b>5.75</b> |
| <i>GOSR2</i>         | rs17608766T>C          | 17:45013271         | C (0.14;0.14)        | <b>1.07 [1.04-1.09]</b> | <b>4.14x10<sup>-8</sup></b> | <b>0.99</b> | 1.06 [1.04-1.09]        | 2.10x10 <sup>-7</sup>       | 0.74        | 5.30        |
| <i>PECAM1</i>        | rs1867624T>C           | 17:62387091         | C (0.39;0.38)        | 0.96 [0.94-0.97]        | 1.14x10 <sup>-7</sup>       | 0.70        | <b>0.96 [0.95-0.97]</b> | <b>3.98x10<sup>-8</sup></b> | <b>0.36</b> | <b>6.03</b> |
|                      | rs9892152C>T           | 17:62401965         | T (0.47;0.46)        | 0.96 [0.95-0.98]        | 2.73x10 <sup>-7</sup>       | 0.41        | <b>0.96 [0.95-0.98]</b> | <b>5.00x10<sup>-8</sup></b> | <b>0.75</b> | <b>5.92</b> |
| (nsSNP) <i>PROCR</i> | rs867186A>G            | 20:33764554         | G (0.11;0.11)        | <b>0.93 [0.91-0.96]</b> | <b>1.26x10<sup>-8</sup></b> | <b>0.61</b> | 0.93 [0.91-0.96]        | 2.70x10 <sup>-9</sup>       | 0.74        | 7.11        |

Chr:Position = chromosome:position (build 37). AF= allele frequency in Europeans; allele frequency averaged across All ancestries. OR [95% CI] = odds ratio [95% confidence interval]. *P* = CAD association *P*-value. *P*<sub>het</sub> is the *P*-value for heterogeneity from the meta-analysis. log<sub>10</sub>BF is the log base 10 of the Bayes factors obtained from the MANTRA analyses (log<sub>10</sub>BF≥6 is considered significant)

**Supplementary Table 6** Summary of *P*-values for the null and associated sets used in the modified MAGENTA pathway analyses with the hypergeometric tests.

|                   | Null set |                              |                      |               |                      |            | Associated set |                              |                        |                        |                        |                        |
|-------------------|----------|------------------------------|----------------------|---------------|----------------------|------------|----------------|------------------------------|------------------------|------------------------|------------------------|------------------------|
|                   |          | <i>P</i> -value distribution |                      |               |                      |            |                | <i>P</i> -value distribution |                        |                        |                        |                        |
| Meta-analysis     | <i>N</i> | <i>Min</i>                   | <i>Q<sub>1</sub></i> | <i>Median</i> | <i>Q<sub>3</sub></i> | <i>Max</i> | <i>N</i>       | <i>Min</i>                   | <i>Q<sub>1</sub></i>   | <i>Median</i>          | <i>Q<sub>3</sub></i>   | <i>Max</i>             |
| EUR               | 1,000    | 0.6530                       | 0.7370               | 0.8195        | 0.9041               | 0.9998     | 53             | 5.82x10 <sup>-14</sup>       | 1.585x10 <sup>-6</sup> | 1.958x10 <sup>-5</sup> | 4.296x10 <sup>-5</sup> | 9.890x10 <sup>-5</sup> |
| EUR+SAS+AA+EAS+CG | 1,000    | 0.6871                       | 0.7696               | 0.8388        | 0.9153               | 0.9999     | 85             | 8.40x10 <sup>-97</sup>       | 4.86x10 <sup>-11</sup> | 9.72x10 <sup>-9</sup>  | 8.04x10 <sup>-8</sup>  | 1.00x10 <sup>-6</sup>  |

*N*: number of variants contained in the set. *Min*: minimum. *Q<sub>1</sub>*: first quartile. *Q<sub>3</sub>*: third quartile. *Max* = maximum.

**Supplementary Table 7** Pathways with enrichment of CAD associated variants from the all ancestry meta-analyses identified using modified MAGENTA.

|                               |            |                                                    |       | Europeans |          |                        |                        | All ancestry |          |                        |                        |
|-------------------------------|------------|----------------------------------------------------|-------|-----------|----------|------------------------|------------------------|--------------|----------|------------------------|------------------------|
| Category                      | Database   | Pathway                                            | Genes | <i>k</i>  | <i>n</i> | <i>P<sub>obs</sub></i> | <i>P<sub>enr</sub></i> | <i>k</i>     | <i>n</i> | <i>P<sub>obs</sub></i> | <i>P<sub>enr</sub></i> |
| Lipids /<br>lipoproteins      | Reactome   | Lipoprotein metabolism                             | 27    | 3         | 3        | 0.00034                | 0.0004                 | 4            | 4        | 0.00004                | 0.0000                 |
|                               | KEGG       | Glycerolipid metabolism                            | 49    | 4         | 4        | 0.00002                | 0.0000                 | 3            | 3        | 0.00047                | 0.0002                 |
|                               | Reactome   | Metabolism of lipids and lipoproteins              | 228   | 6         | 11       | 0.00004                | 0.0001                 | 7            | 15       | 0.00005                | 0.0003                 |
|                               | Reactome   | Chylomicron mediated lipid transport               | 17    | 1         | 1        | 0.07063                | 1.0000                 | 3            | 3        | 0.00047                | 0.0003                 |
|                               | Ingenuity  | FXR/RXR activation                                 | 57    | 3         | 6        | 0.00581                | 0.0047                 | 4            | 6        | 0.00047                | 0.0006                 |
|                               | Panther BP | Lipid and fatty acid transport                     | 111   | 3         | 11       | 0.03701                | 0.0378                 | 5            | 11       | 0.00083                | 0.0016                 |
|                               | Ingenuity  | LXR/RXR activation                                 | 40    | 1         | 2        | 0.13634                | 1.0000                 | 3            | 4        | 0.00176                | 0.0020                 |
|                               | Panther MF | Apolipoprotein                                     | 23    | 1         | 2        | 0.13634                | 1.0000                 | 2            | 2        | 0.00607                | 0.0050                 |
|                               | Panther MF | Lipase                                             | 19    | 1         | 1        | 0.07063                | 1.0000                 | 2            | 2        | 0.00607                | 0.0069                 |
|                               | KEGG       | Glycerophospholipid metabolism                     | 77    | 3         | 5        | 0.00306                | 0.0029                 | 1            | 5        | 0.33548                | 1.0000                 |
|                               | Reactome   | HDL mediated lipid transport                       | 11    | 2         | 2        | 0.00493                | 0.0041                 | 1            | 1        | 0.07834                | 1.0000                 |
| Immune system /<br>thrombosis | Reactome   | Signaling by platelet derived growth factor (PDGF) | 64    | 4         | 10       | 0.00349                | 0.0026                 | 4            | 7        | 0.00103                | 0.0009                 |
|                               | BioCarta   | Platelet amyloid precursor protein (APP)           | 14    | 3         | 5        | 0.00306                | 0.0034                 | 3            | 4        | 0.00176                | 0.0019                 |

|                                  |            |                                                 |     |   |    |         |        |   |    |         |        |
|----------------------------------|------------|-------------------------------------------------|-----|---|----|---------|--------|---|----|---------|--------|
|                                  | BioCarta   | Intrinsic prothrombin activation                | 23  | 2 | 2  | 0.00493 | 0.0049 | 2 | 3  | 0.01728 | 0.0167 |
|                                  | Reactome   | Formation of platelet plug                      | 185 | 5 | 16 | 0.00364 | 0.0045 | 3 | 15 | 0.10636 | 0.1037 |
|                                  | Reactome   | Platelet activation                             | 166 | 5 | 16 | 0.00364 | 0.0033 | 3 | 15 | 0.10636 | 0.1048 |
|                                  | Reactome   | G alpha Q signalling events                     | 155 | 4 | 12 | 0.00737 | 0.0072 | 2 | 8  | 0.12471 | 0.1172 |
| Heart / cardiac<br>function      | BioCarta   | Acute myocardial infarction (AMI)               | 20  | 3 | 4  | 0.00129 | 0.0004 | 3 | 4  | 0.00176 | 0.0011 |
|                                  | BioCarta   | Angiotensin-converting enzyme (ACE) 2           | 13  | 2 | 2  | 0.00493 | 0.0041 | 2 | 2  | 0.00607 | 0.0073 |
| Blood                            | Panther    | Endothelin signaling pathway                    | 19  | 3 | 4  | 0.00129 | 0.0013 | 3 | 4  | 0.00176 | 0.0019 |
|                                  | Reactome   | Hemostasis                                      | 272 | 7 | 21 | 0.00035 | 0.0006 | 5 | 21 | 0.01959 | 0.0206 |
| Vitamin C                        | BioCarta   | Vitamin C in the brain                          | 11  | 2 | 2  | 0.00493 | 0.0047 | 2 | 2  | 0.00607 | 0.0052 |
| Phosphatase                      | Panther MF | Phosphatase modulator                           | 19  | 1 | 1  | 0.07063 | 1.0000 | 2 | 2  | 0.00607 | 0.0058 |
| DNA/RNA<br>modification          | Reactome   | Elongation and processing of capped transcripts | 133 | 1 | 1  | 0.07063 | 1.0000 | 2 | 2  | 0.00607 | 0.0069 |
| Cell structure /<br>interactions | Panther MF | Cation transporter                              | 112 | 3 | 11 | 0.03701 | 0.0345 | 4 | 11 | 0.00757 | 0.0076 |
|                                  | Reactome   | mRNA splicing                                   | 107 | 1 | 1  | 0.07063 | 1.0000 | 2 | 2  | 0.00607 | 0.0077 |
|                                  | Reactome   | Integrin cell surface interactions              | 81  | 4 | 6  | 0.00031 | 0.0006 | 3 | 8  | 0.01948 | 0.0169 |
|                                  | Reactome   | Cell surface interactions at the vascular wall  | 93  | 4 | 8  | 0.00130 | 0.0006 | 3 | 8  | 0.01948 | 0.0227 |
|                                  | KEGG       | ECM receptor interaction                        | 84  | 3 | 6  | 0.00581 | 0.0057 | 2 | 7  | 0.09840 | 0.0959 |

|         |            |                                                     |    |   |    |         |        |   |    |         |        |
|---------|------------|-----------------------------------------------------|----|---|----|---------|--------|---|----|---------|--------|
| SNARE   | Panther MF | SNARE protein                                       | 36 | 2 | 2  | 0.00493 | 0.0041 | 2 | 3  | 0.01728 | 0.0168 |
| protein | KEGG       | SNARE interactions in vesicular transport           | 37 | 2 | 2  | 0.00493 | 0.0040 | 2 | 3  | 0.01728 | 0.0173 |
| Liver   | Ingenuity  | Hepatic fibrosis / hepatic stellate cell activation | 83 | 4 | 11 | 0.00519 | 0.0068 | 3 | 10 | 0.03723 | 0.0397 |

For each hypergeometric test the empirical  $P$ -values displayed were calculated based on comparing the observed  $P$ -value to those obtained from 10,000 random sets. Seventy six SNPs formed the associated set for the European ancestry analysis and 85 for the All ancestry analysis. Genes: the number of genes that are listed for that pathway in the database.  $n$ : number of analyses for which this pathway showed evidence of enrichment at  $P < 0.01$ .  $k$ : number of variants in the associated set that were mapped to a gene listed in the pathway. <sup>§</sup>  $P < 0.0001$ , occurs when no random set hypergeometric test  $P$ -values are less than or equal to the observed  $P$ -value.

## **Supplementary Figures**

**Supplementary Figure 1:** QQ plots illustrating array-wide inflation for each of the studies with *de novo* genotyping. **(a)** CIHDS/CGPS studies analysed using a mixed effects model at 136,127 SNPs **(b)** CCHS study analysed at 135,910 SNPs **(c)** EPIC-CVD analysed using a mixed model at 134,533 SNPs **(d)** EPIC-CVD-Umea analysed using a mixed model at 133,849 SNPs **(e)** South Asian studies PROMIS and BRAVE combined in a mixed model analysis of 127,114 SNPs **(f)** MIGen analysed using a logistic regression model at 123,885 SNPs (note the two SNPs with  $P < 1 \times 10^{-8}$ , only passed QC in MIGen and consequently are likely to be genotype clustering artefacts and were excluded from all meta analyses) **(g)** WHI analysed at 145,132 SNPs **(h)** ARIC males analysed using a logistic regression model at 143,615 SNPs **(i)** ARIC females analysed using logistic regression at 143,473 SNPs **(j)** TAICHI using linear a mixed model at 103,238 SNPs. Inflation factors are reported in Supplementary Table 3.

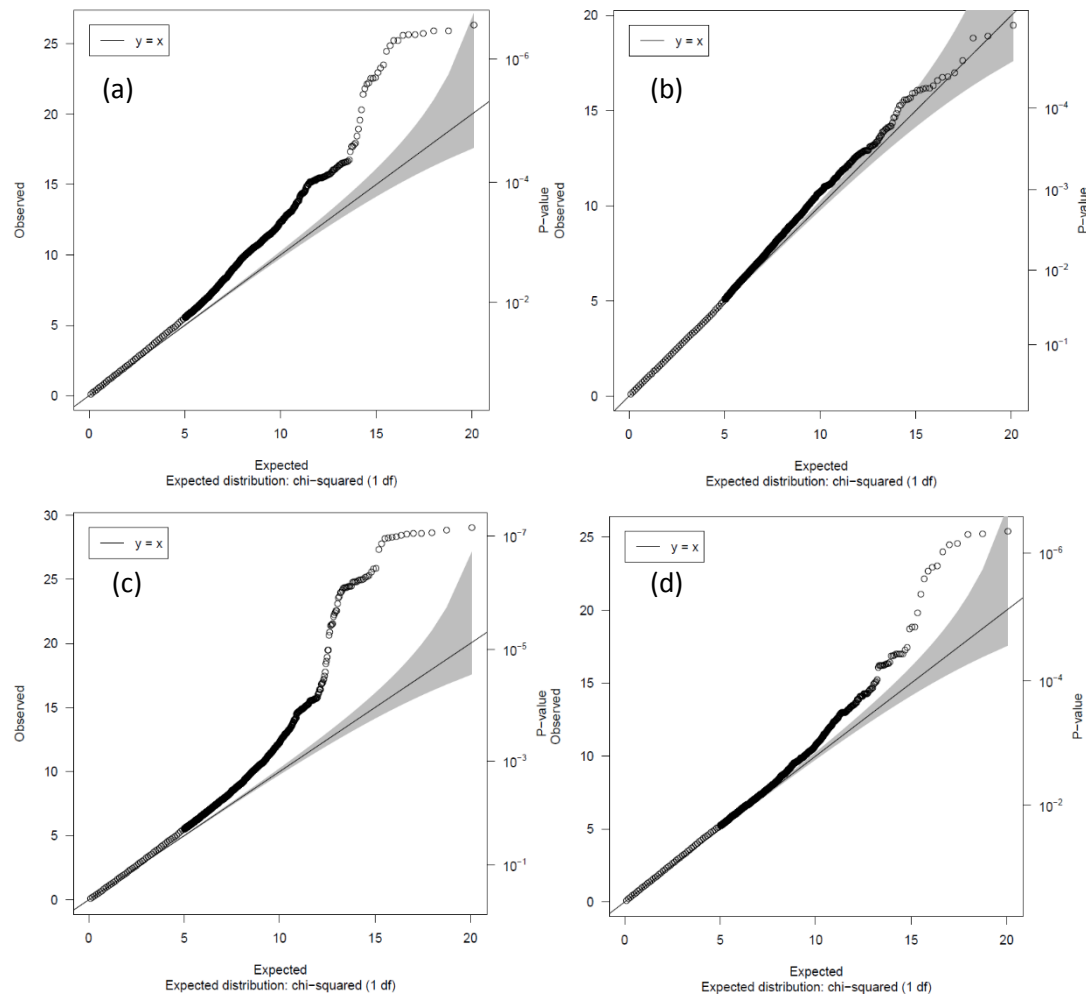

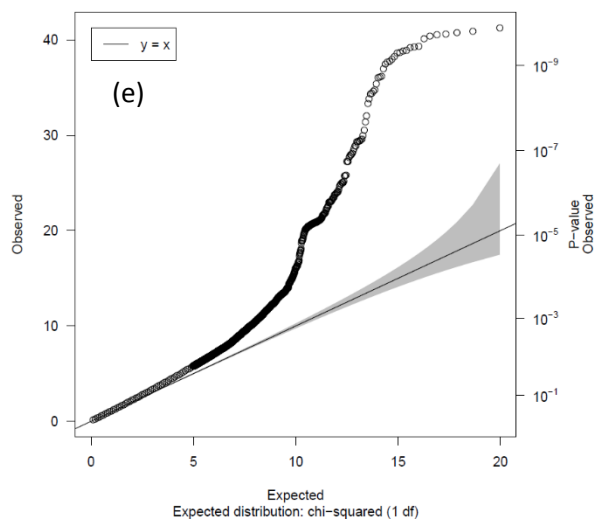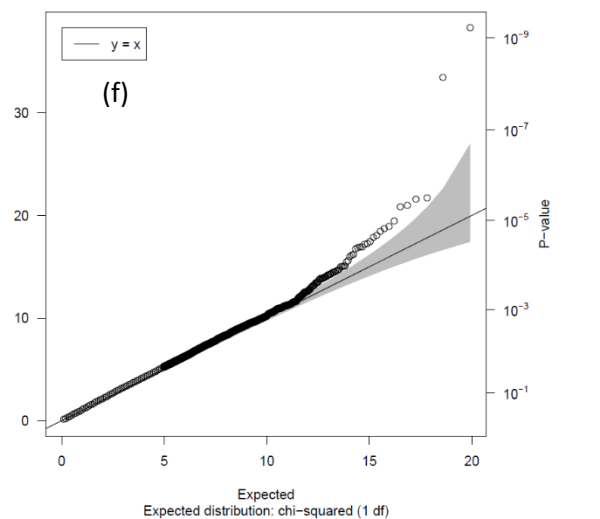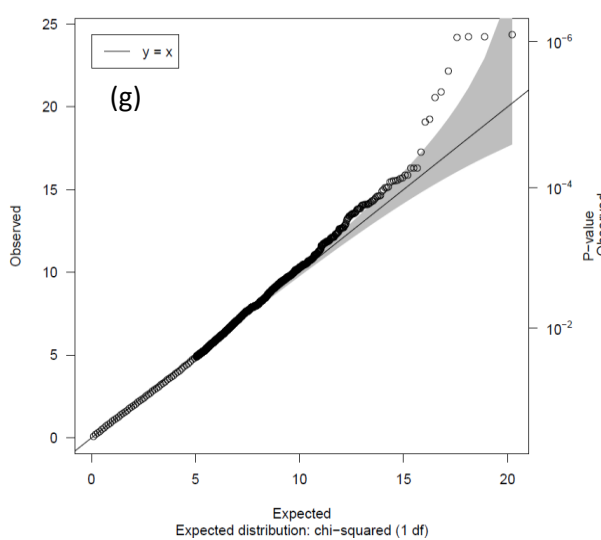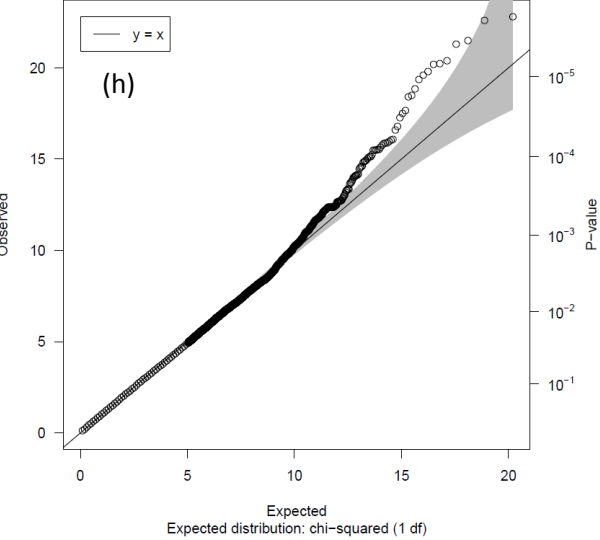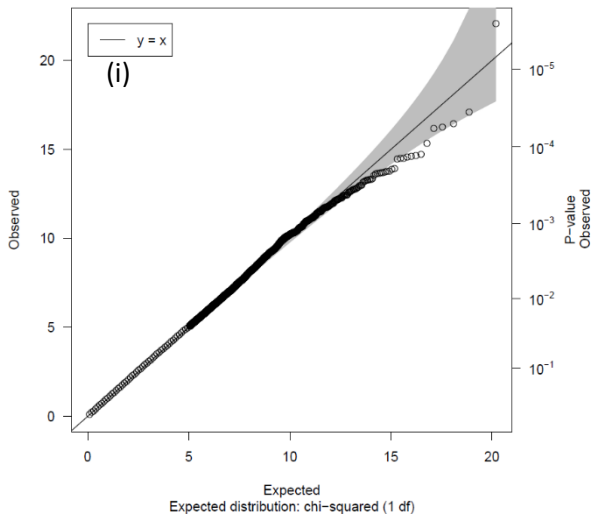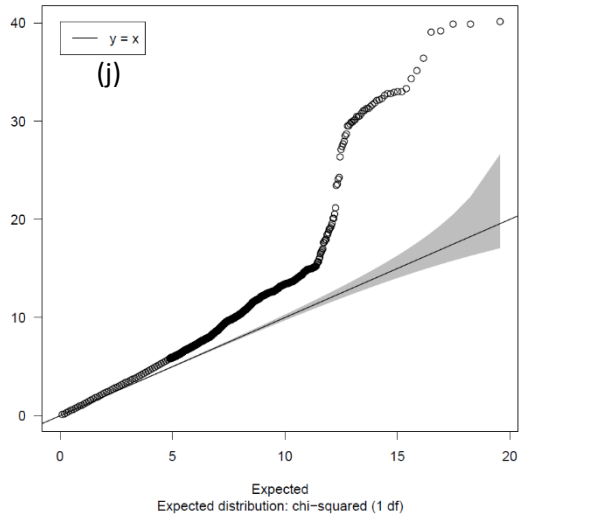

**Supplementary Figure 2:** Manhattan plot showing the association of ~79,000 variants with CAD from the European meta-analysis in up to ~221,000 individuals. Red dots represent SNPs that map to LD blocks that include the previously published (known) CAD regions. The SNP with the most evidence of association in this meta-analysis was rs133045 in the 9p21 region ( $P=1 \times 10^{-93}$ ). -  $\log(P=5 \times 10^{-8}) \sim 7.3$

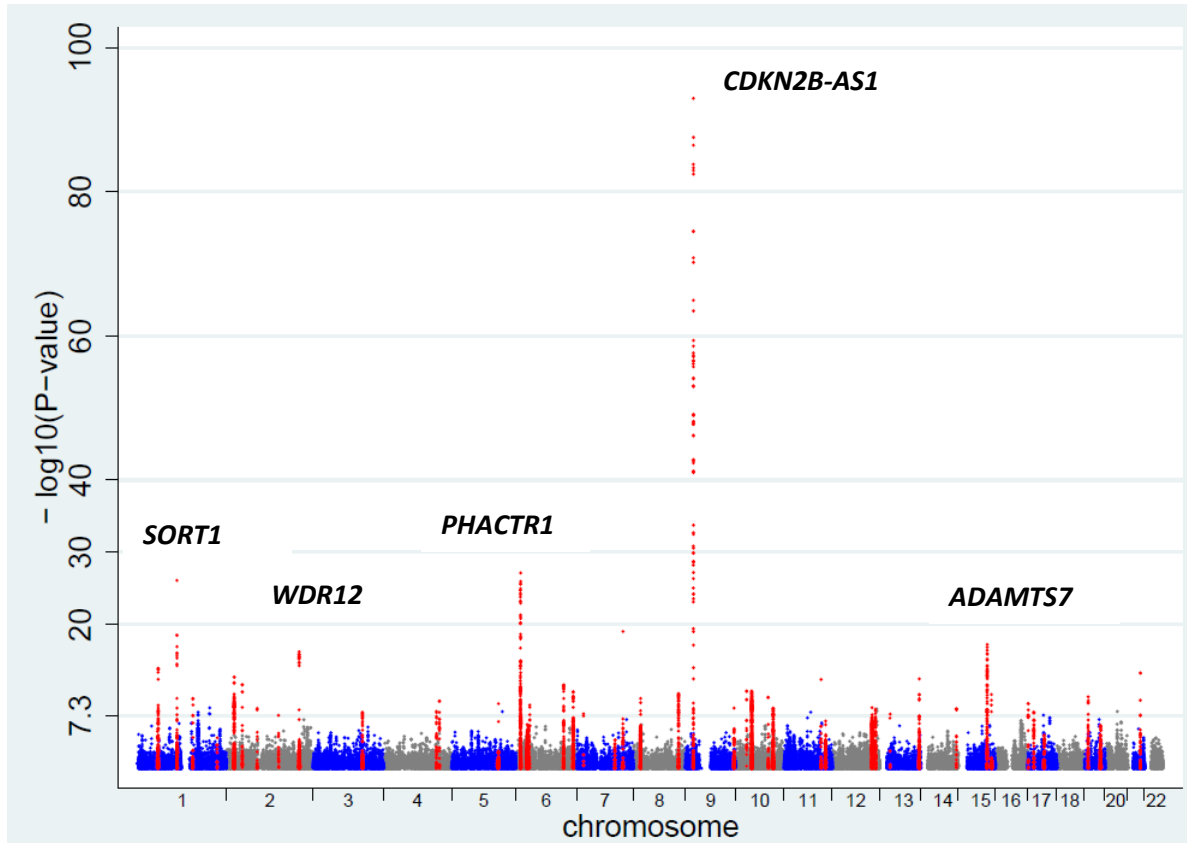

**Supplementary Figure 3:** Forest plots from the all studies meta-analysis for the 15 sentinel CAD-associated SNPs. N = number of subjects, EA= effect allele, EAF= effect allele frequency, OR = odds ratio, CI = confidence interval.

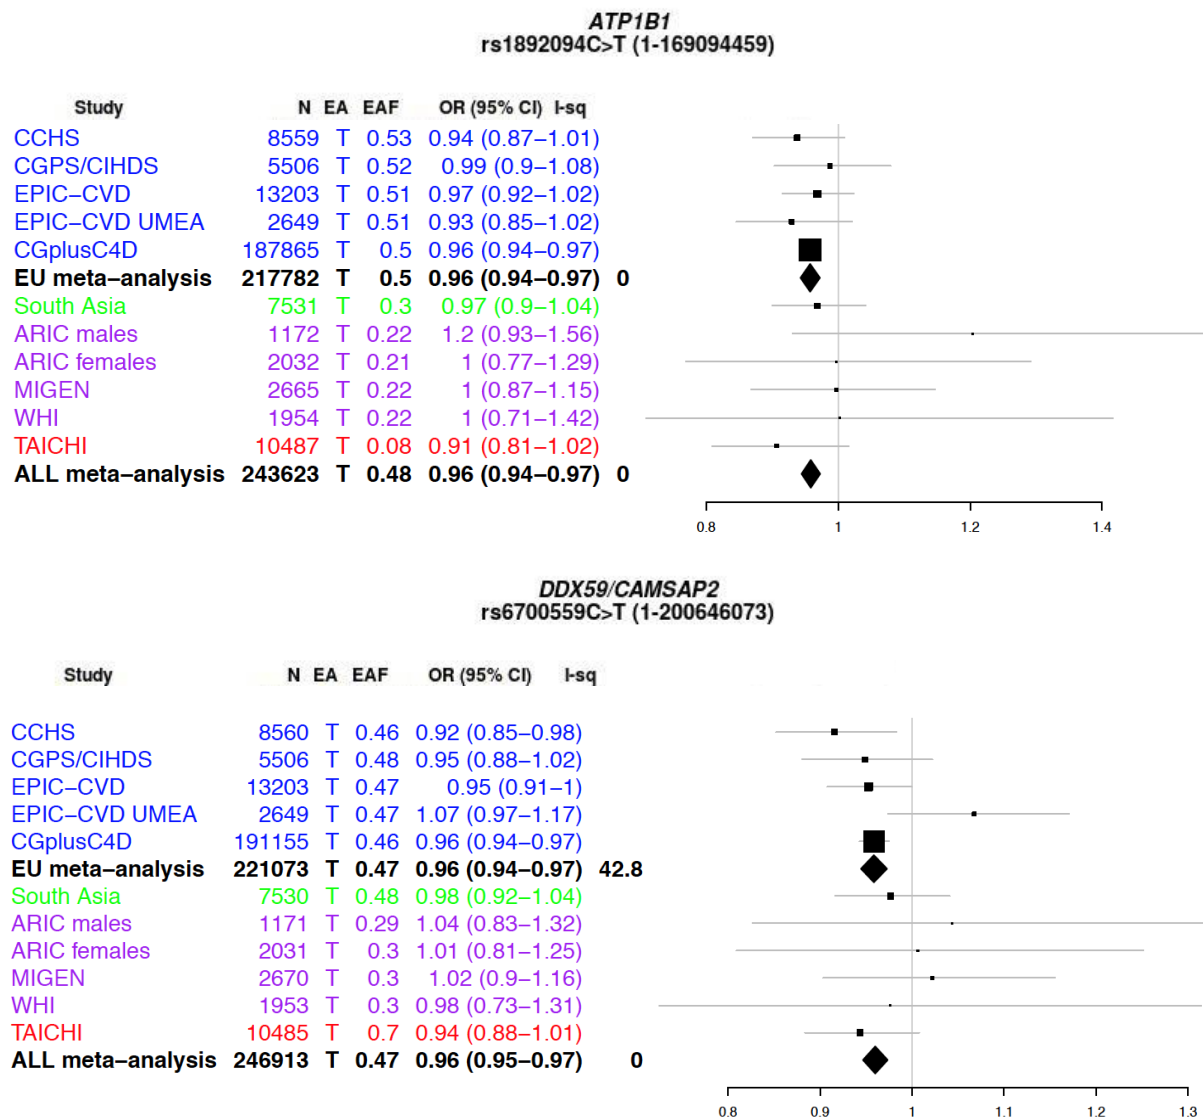

***LMOD1***  
**rs2820315C>T (1-201872264)**

| Study                    | N             | EA       | EAF         | OR (95% CI)             | I-sq        |
|--------------------------|---------------|----------|-------------|-------------------------|-------------|
| CCHS                     | 8558          | T        | 0.31        | 1.07 (0.99–1.15)        |             |
| CGPS/CIHDS               | 5503          | T        | 0.3         | 1.22 (1.12–1.32)        |             |
| EPIC–CVD                 | 13202         | T        | 0.28        | 1.03 (0.97–1.09)        |             |
| EPIC–CVD UMEA            | 2649          | T        | 0.31        | 1 (0.9–1.1)             |             |
| CGplusC4D                | 184932        | T        | 0.31        | 1.05 (1.03–1.07)        |             |
| <b>EU meta-analysis</b>  | <b>214844</b> | <b>T</b> | <b>0.3</b>  | <b>1.05 (1.03–1.07)</b> | <b>72.3</b> |
| South Asia               | 7528          | T        | 0.25        | 1.09 (1.01–1.18)        |             |
| ARIC males               | 1172          | T        | 0.08        | 0.61 (0.37–1.01)        |             |
| ARIC females             | 2031          | T        | 0.08        | 1.1 (0.76–1.59)         |             |
| MIGEN                    | 2670          | T        | 0.09        | 0.98 (0.8–1.2)          |             |
| WHI                      | 1953          | T        | 0.1         | 1.24 (0.79–1.95)        |             |
| TAICHI                   | 10487         | T        | 0.11        | 1.01 (0.92–1.11)        |             |
| <b>ALL meta-analysis</b> | <b>240685</b> | <b>T</b> | <b>0.29</b> | <b>1.05 (1.03–1.07)</b> | <b>53.8</b> |

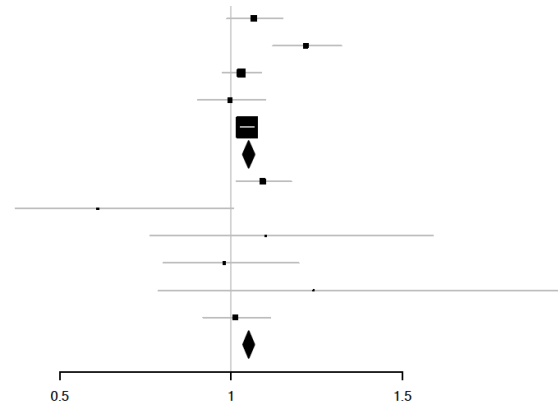

***TNS1***  
**rs2571445G>A (2-218683154)**

| Study                    | N             | EA       | EAF         | OR (95% CI)             | I-sq        |
|--------------------------|---------------|----------|-------------|-------------------------|-------------|
| CCHS                     | 8561          | A        | 0.38        | 1.04 (0.96–1.11)        |             |
| CGPS/CIHDS               | 5506          | A        | 0.39        | 1.05 (0.97–1.13)        |             |
| EPIC–CVD                 | 13190         | A        | 0.38        | 1.05 (0.99–1.1)         |             |
| EPIC–CVD UMEA            | 2649          | A        | 0.41        | 0.99 (0.9–1.08)         |             |
| CGplusC4D                | 164348        | A        | 0.4         | 1.04 (1.02–1.06)        |             |
| <b>EU meta-analysis</b>  | <b>194254</b> | <b>A</b> | <b>0.39</b> | <b>1.04 (1.02–1.06)</b> | <b>0</b>    |
| South Asia               | 7525          | A        | 0.44        | 1.18 (1.11–1.26)        |             |
| ARIC males               | 1161          | A        | 0.19        | 0.93 (0.71–1.22)        |             |
| ARIC females             | 2011          | A        | 0.19        | 1.21 (0.95–1.53)        |             |
| MIGEN                    | 2655          | A        | 0.2         | 0.95 (0.83–1.1)         |             |
| WHI                      | 1954          | A        | 0.21        | 1.17 (0.85–1.61)        |             |
| TAICHI                   | 10487         | A        | 0.36        | 1.1 (1.03–1.17)         |             |
| <b>ALL meta-analysis</b> | <b>220047</b> | <b>A</b> | <b>0.39</b> | <b>1.05 (1.03–1.06)</b> | <b>54.8</b> |

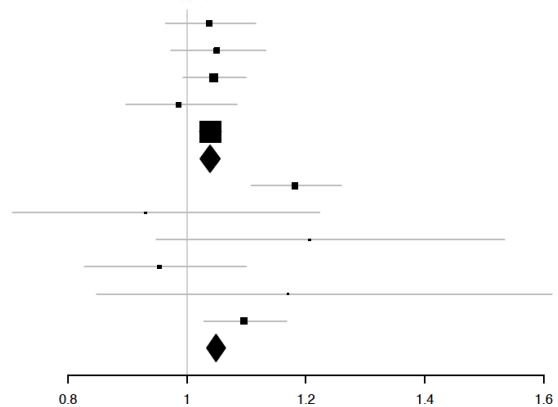

***ARHGAP26***  
**rs246600C>T (5-142516897)**

| Study                    | N             | EA       | EAF         | OR (95% CI)             | I-sq       |
|--------------------------|---------------|----------|-------------|-------------------------|------------|
| CCHS                     | 8559          | T        | 0.5         | 1.05 (0.98–1.13)        |            |
| CGPS/CIHDS               | 5506          | T        | 0.5         | 1.09 (1.01–1.17)        |            |
| EPIC–CVD                 | 13205         | T        | 0.5         | 1.02 (0.97–1.07)        |            |
| EPIC–CVD UMEA            | 2649          | T        | 0.5         | 0.98 (0.9–1.08)         |            |
| CGplusC4D                | 180461        | T        | 0.48        | 1.05 (1.03–1.07)        |            |
| <b>EU meta-analysis</b>  | <b>210380</b> | <b>T</b> | <b>0.48</b> | <b>1.05 (1.03–1.06)</b> | <b>0</b>   |
| South Asia               | 7530          | T        | 0.35        | 1.02 (0.95–1.09)        |            |
| ARIC males               | 1172          | T        | 0.32        | 1.29 (1.03–1.6)         |            |
| ARIC females             | 2030          | T        | 0.33        | 1 (0.81–1.24)           |            |
| MIGEN                    | 2669          | T        | 0.32        | 1.01 (0.89–1.13)        |            |
| WHI                      | 1954          | T        | 0.34        | 1.16 (0.87–1.55)        |            |
| TAICHI                   | 10488         | T        | 0.12        | 0.98 (0.89–1.07)        |            |
| <b>ALL meta-analysis</b> | <b>236223</b> | <b>T</b> | <b>0.46</b> | <b>1.04 (1.03–1.06)</b> | <b>8.5</b> |

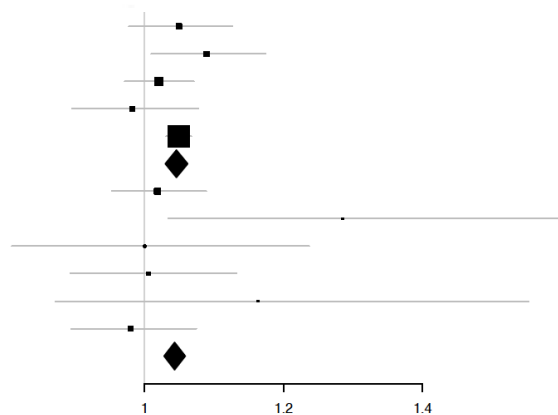

**PARP12**  
**rs10237377G>T (7-139757136)**

| Study                    | N             | EA       | EAF         | OR (95% CI)             | I-sq        |
|--------------------------|---------------|----------|-------------|-------------------------|-------------|
| CCHS                     | 8557          | T        | 0.36        | 0.87 (0.81–0.94)        |             |
| CGPS/CIHDS               | 5506          | T        | 0.36        | 0.96 (0.89–1.04)        |             |
| EPIC–CVD                 | 13204         | T        | 0.38        | 0.95 (0.9–1)            |             |
| EPIC–CVD UMEA            | 2649          | T        | 0.35        | 1.01 (0.92–1.11)        |             |
| CGplusC4D                | 151643        | T        | 0.34        | 0.95 (0.93–0.97)        |             |
| <b>EU meta-analysis</b>  | <b>181559</b> | <b>T</b> | <b>0.35</b> | <b>0.95 (0.93–0.97)</b> | <b>44.1</b> |
| South Asia               | 7529          | T        | 0.24        | 0.95 (0.89–1.03)        |             |
| ARIC males               | 1172          | T        | 0.73        | 0.79 (0.62–1)           |             |
| ARIC females             | 2031          | T        | 0.72        | 0.97 (0.77–1.22)        |             |
| MIGEN                    | 2667          | T        | 0.71        | 1.01 (0.89–1.15)        |             |
| WHI                      | 1954          | T        | 0.7         | 0.84 (0.63–1.13)        |             |
| TAICHI                   | 10487         | T        | 0.6         | 0.96 (0.9–1.02)         |             |
| <b>ALL meta-analysis</b> | <b>207399</b> | <b>T</b> | <b>0.38</b> | <b>0.95 (0.93–0.97)</b> | <b>11</b>   |

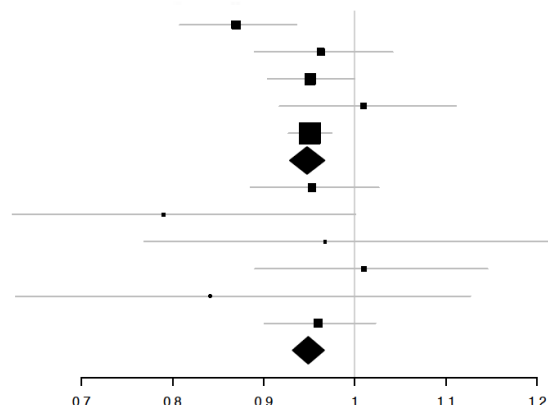

**PCNX3**  
**rs12801636G>A (11-65391317)**

| Study                    | N             | EA       | EAF         | OR (95% CI)             | I-sq        |
|--------------------------|---------------|----------|-------------|-------------------------|-------------|
| CCHS                     | 8559          | A        | 0.22        | 1.01 (0.93–1.11)        |             |
| CGPS/CIHDS               | 5506          | A        | 0.21        | 1.01 (0.92–1.11)        |             |
| EPIC–CVD                 | 13188         | A        | 0.22        | 0.92 (0.87–0.97)        |             |
| EPIC–CVD UMEA            | 2649          | A        | 0.24        | 0.92 (0.83–1.03)        |             |
| CGplusC4D                | 181250        | A        | 0.23        | 0.95 (0.93–0.97)        |             |
| <b>EU meta-analysis</b>  | <b>211152</b> | <b>A</b> | <b>0.23</b> | <b>0.95 (0.93–0.97)</b> | <b>29.8</b> |
| South Asia               | 7530          | A        | 0.27        | 0.93 (0.86–1)           |             |
| ARIC males               | 1171          | A        | 0.27        | 1.01 (0.8–1.28)         |             |
| ARIC females             | 2029          | A        | 0.26        | 0.8 (0.63–1.02)         |             |
| MIGEN                    | 2663          | A        | 0.25        | 1.02 (0.89–1.16)        |             |
| WHI                      | 1954          | A        | 0.25        | 0.95 (0.7–1.3)          |             |
| TAICHI                   | 10486         | A        | 0.4         | 0.97 (0.91–1.03)        |             |
| <b>ALL meta-analysis</b> | <b>236985</b> | <b>A</b> | <b>0.25</b> | <b>0.95 (0.94–0.97)</b> | <b>0</b>    |

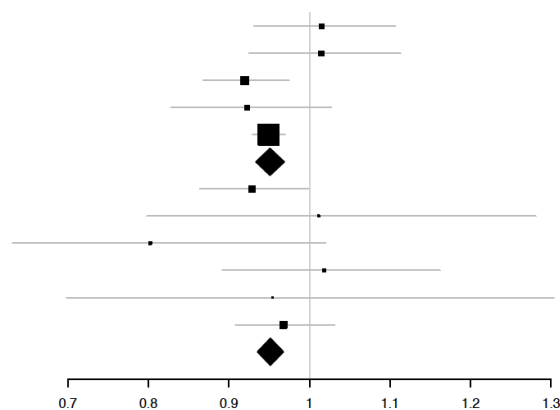

**SERPINH1**  
**rs590121G>T (11-75274150)**

| Study                    | N             | EA       | EAF         | OR (95% CI)             | I-sq        |
|--------------------------|---------------|----------|-------------|-------------------------|-------------|
| CCHS                     | 8555          | T        | 0.28        | 1.03 (0.96–1.12)        |             |
| CGPS/CIHDS               | 5498          | T        | 0.28        | 1.12 (1.03–1.22)        |             |
| EPIC–CVD                 | 13175         | T        | 0.3         | 1.04 (0.99–1.1)         |             |
| EPIC–CVD UMEA            | 2646          | T        | 0.33        | 1 (0.91–1.11)           |             |
| CGplusC4D                | 177552        | T        | 0.3         | 1.05 (1.03–1.07)        |             |
| <b>EU meta-analysis</b>  | <b>207426</b> | <b>T</b> | <b>0.3</b>  | <b>1.05 (1.03–1.07)</b> | <b>0</b>    |
| South Asia               | 7526          | T        | 0.41        | 0.94 (0.88–1)           |             |
| ARIC males               | 1168          | T        | 0.46        | 1.1 (0.89–1.36)         |             |
| ARIC females             | 2029          | T        | 0.45        | 1.13 (0.93–1.39)        |             |
| MIGEN                    | 2661          | T        | 0.46        | 1.01 (0.91–1.13)        |             |
| WHI                      | 1954          | T        | 0.45        | 0.86 (0.66–1.13)        |             |
| TAICHI                   | 10482         | T        | 0.17        | 1.09 (1–1.18)           |             |
| <b>ALL meta-analysis</b> | <b>233246</b> | <b>T</b> | <b>0.31</b> | <b>1.04 (1.03–1.06)</b> | <b>45.8</b> |

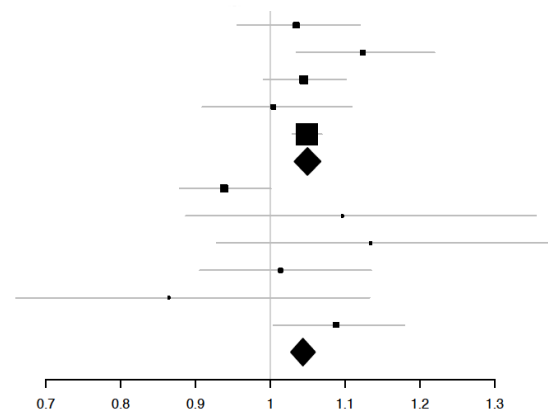

***C12orf43***  
**rs2258287C>A (12-121454313)**

| Study                    | N             | EA       | EAF         | OR (95% CI)             | I-sq        |
|--------------------------|---------------|----------|-------------|-------------------------|-------------|
| CCHS                     | 8558          | A        | 0.32        | 1.02 (0.94–1.1)         |             |
| CGPS/CIHDS               | 5504          | A        | 0.32        | 1.15 (1.06–1.24)        |             |
| EPIC–CVD                 | 13200         | A        | 0.33        | 1.02 (0.97–1.07)        |             |
| EPIC–CVD UMEA            | 2649          | A        | 0.39        | 1.1 (1–1.2)             |             |
| CGplusC4D                | 191157        | A        | 0.34        | 1.05 (1.03–1.07)        |             |
| <b>EU meta-analysis</b>  | <b>221068</b> | <b>A</b> | <b>0.34</b> | <b>1.05 (1.03–1.06)</b> | <b>48.4</b> |
| South Asia               | 7525          | A        | 0.5         | 1.02 (0.95–1.08)        |             |
| ARIC males               | 1172          | A        | 0.3         | 1.11 (0.89–1.4)         |             |
| ARIC females             | 2031          | A        | 0.29        | 0.84 (0.67–1.06)        |             |
| MIGEN                    | 2667          | A        | 0.3         | 1.02 (0.9–1.15)         |             |
| WHI                      | 1954          | A        | 0.3         | 1.19 (0.9–1.57)         |             |
| TAICHI                   | 10484         | A        | 0.74        | 1 (0.93–1.07)           |             |
| <b>ALL meta-analysis</b> | <b>246901</b> | <b>A</b> | <b>0.37</b> | <b>1.04 (1.03–1.06)</b> | <b>33.9</b> |

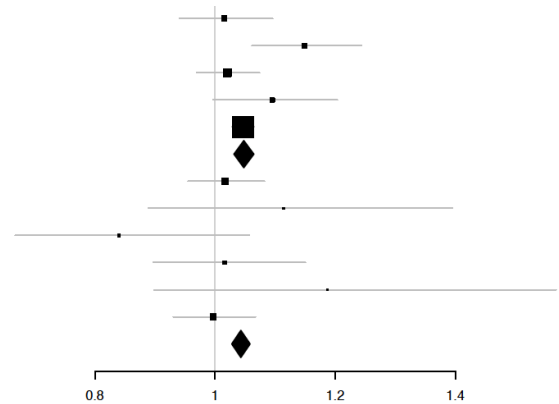

***SCARB1***  
**rs11057830G>A (12-125307053)**

| Study                    | N             | EA       | EAF         | OR (95% CI)             | I-sq     |
|--------------------------|---------------|----------|-------------|-------------------------|----------|
| CCHS                     | 8561          | A        | 0.13        | 1.09 (0.98–1.21)        |          |
| CGPS/CIHDS               | 5506          | A        | 0.14        | 1.02 (0.91–1.14)        |          |
| EPIC–CVD                 | 13205         | A        | 0.18        | 1.04 (0.98–1.11)        |          |
| EPIC–CVD UMEA            | 2649          | A        | 0.13        | 1.17 (1.02–1.34)        |          |
| CGplusC4D                | 147629        | A        | 0.16        | 1.07 (1.05–1.1)         |          |
| <b>EU meta-analysis</b>  | <b>177550</b> | <b>A</b> | <b>0.16</b> | <b>1.07 (1.05–1.1)</b>  | <b>0</b> |
| South Asia               | 7531          | A        | 0.1         | 1.02 (0.92–1.13)        |          |
| ARIC males               | 1172          | A        | 0.18        | 0.95 (0.72–1.25)        |          |
| ARIC females             | 2032          | A        | 0.18        | 0.97 (0.74–1.26)        |          |
| MIGEN                    | 2667          | A        | 0.18        | 1.01 (0.87–1.17)        |          |
| WHI                      | 1954          | A        | 0.16        | 0.9 (0.62–1.31)         |          |
| TAICHI                   | 10488         | A        | 0.11        | 1.05 (0.96–1.16)        |          |
| <b>ALL meta-analysis</b> | <b>203394</b> | <b>A</b> | <b>0.15</b> | <b>1.06 (1.04–1.09)</b> | <b>0</b> |

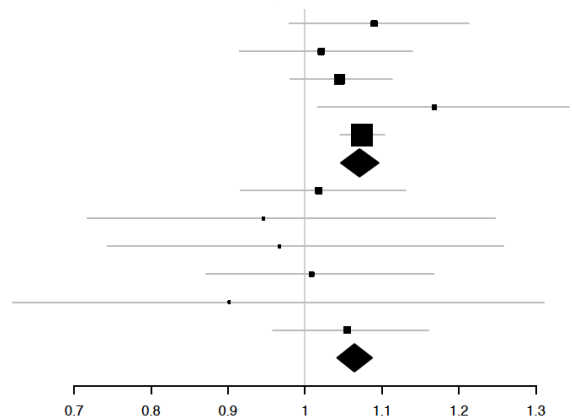

***OAZ2/RBPMS2***  
**rs6494488A>G (15-65024204)**

| Study                    | N             | EA       | EAF         | OR (95% CI)             | I-sq     |
|--------------------------|---------------|----------|-------------|-------------------------|----------|
| CCHS                     | 8560          | G        | 0.16        | 0.92 (0.84–1.02)        |          |
| CGPS/CIHDS               | 5503          | G        | 0.16        | 1.04 (0.94–1.15)        |          |
| EPIC–CVD                 | 13179         | G        | 0.16        | 0.97 (0.9–1.03)         |          |
| EPIC–CVD UMEA            | 2648          | G        | 0.15        | 0.98 (0.86–1.11)        |          |
| CGplusC4D                | 175520        | G        | 0.18        | 0.95 (0.92–0.97)        |          |
| <b>EU meta-analysis</b>  | <b>205410</b> | <b>G</b> | <b>0.18</b> | <b>0.95 (0.93–0.97)</b> | <b>0</b> |
| South Asia               | 7527          | G        | 0.46        | 0.92 (0.86–0.98)        |          |
| ARIC males               | 1171          | G        | 0.69        | 0.79 (0.62–1.01)        |          |
| ARIC females             | 2030          | G        | 0.69        | 0.85 (0.68–1.06)        |          |
| WHI                      | 1954          | G        | 0.65        | 1 (0.74–1.36)           |          |
| TAICHI                   | 10486         | G        | 0.06        | 0.98 (0.87–1.11)        |          |
| <b>ALL meta-analysis</b> | <b>228578</b> | <b>G</b> | <b>0.21</b> | <b>0.95 (0.93–0.97)</b> |          |

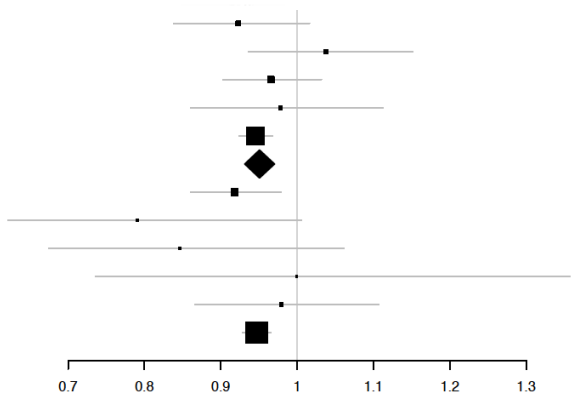

**DHX38**  
**rs1050362C>A (16-72130815)**

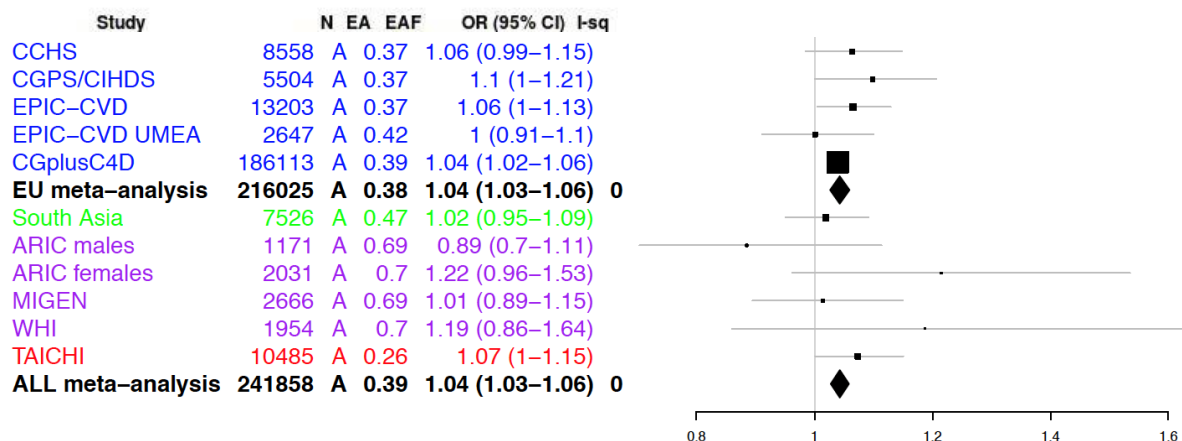

**GOSR2**  
**rs17608766T>C (17-45013271)**

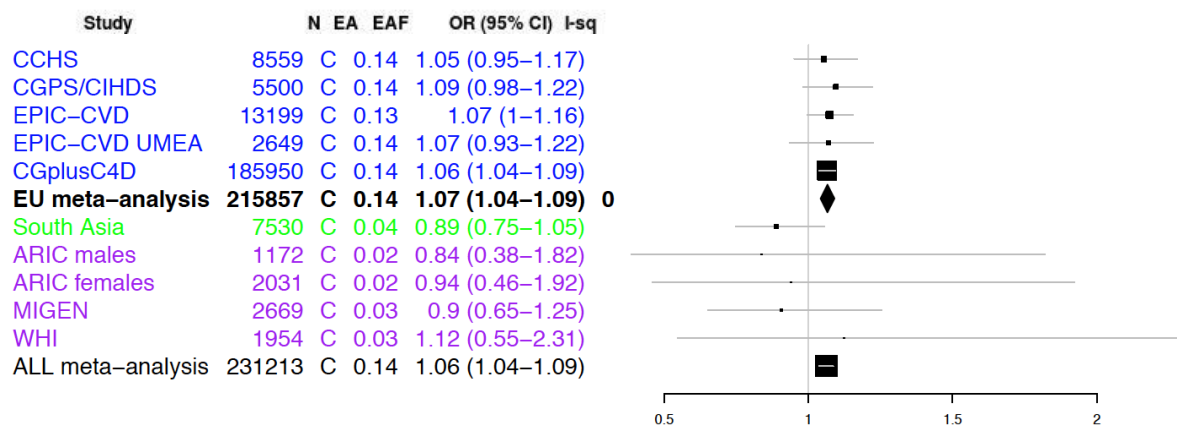

**PECAM1**  
**rs1867624T>C (17-62387091)**

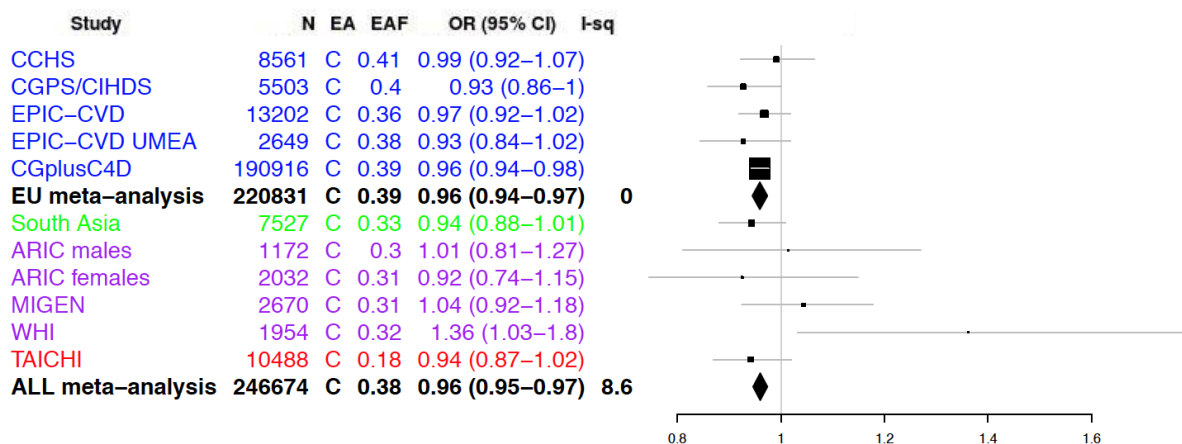

**PROCR**  
rs867186A>G (20-33764554)

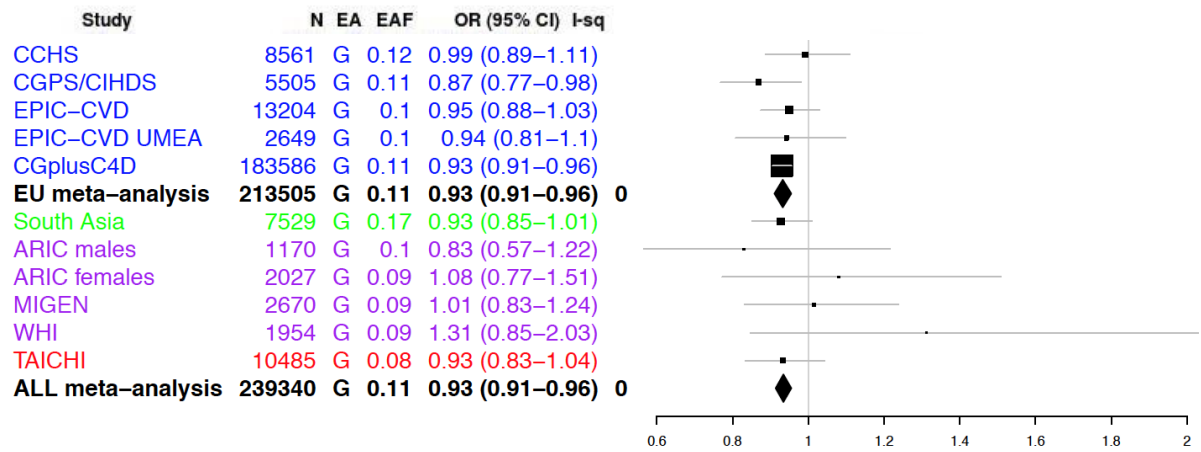

**Supplementary Figure 4:** Regional association plots for novel CAD associated loci (a) from the all ancestry meta-analysis for 13 loci and the European meta-analysis for *GOSR* and *SERPINH1*. (b) from the publicly available CARDIoGRAMplusC4D 1000G imputed GWAS results<sup>1</sup>. The  $r^2$  information was calculated from the phased genotypes of 1000 Genome phase3 v5 (11/04/2014) super-populations (*PROCR* is given in Supplementary Figure 8).

### Supplementary Figure 4(a)

#### *ATP1B1*

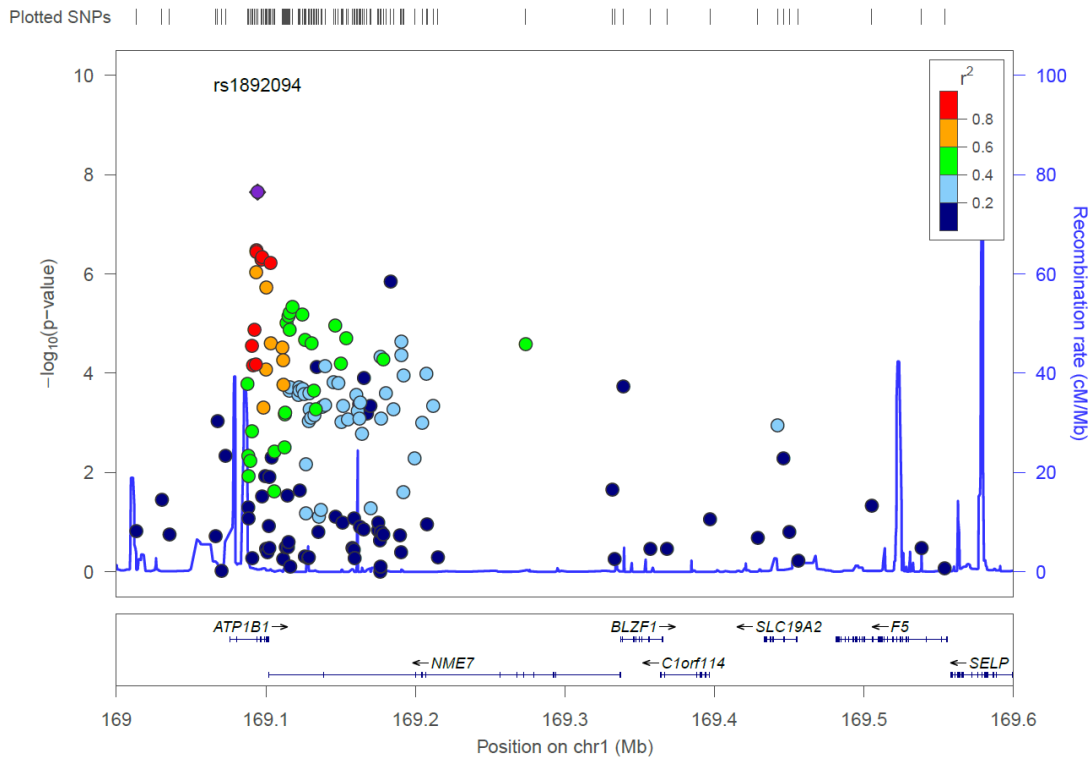

## DDX59/CAMSAP2

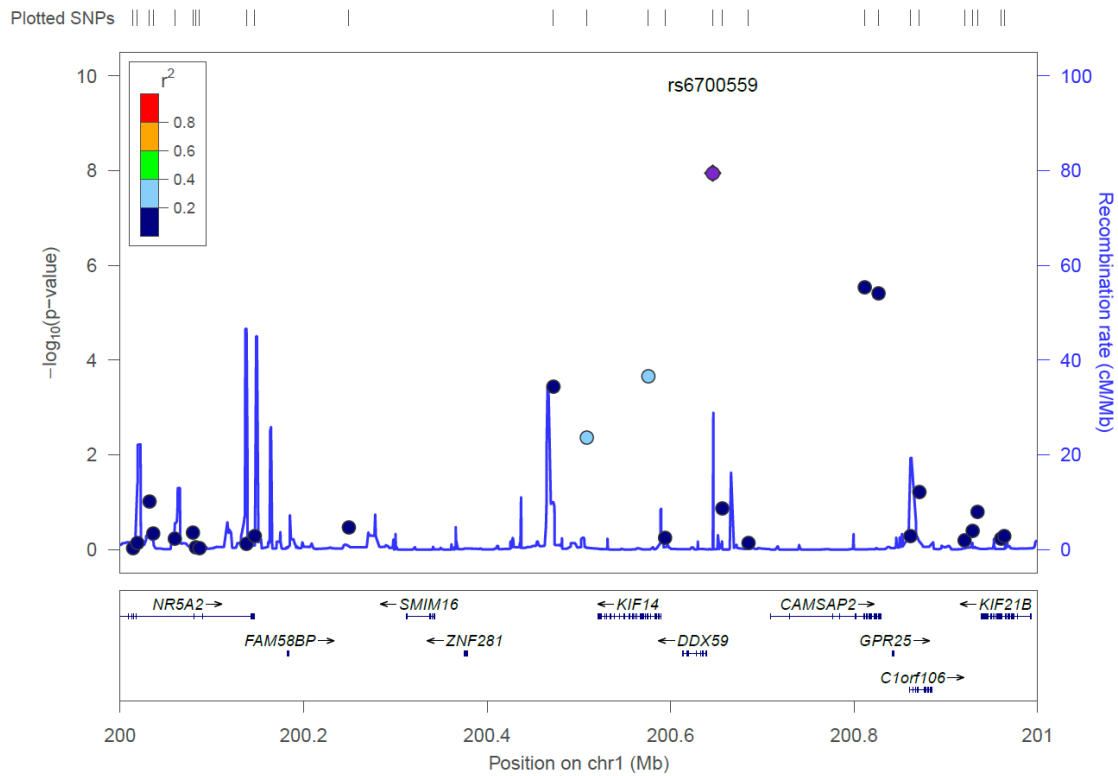

## LMOD1

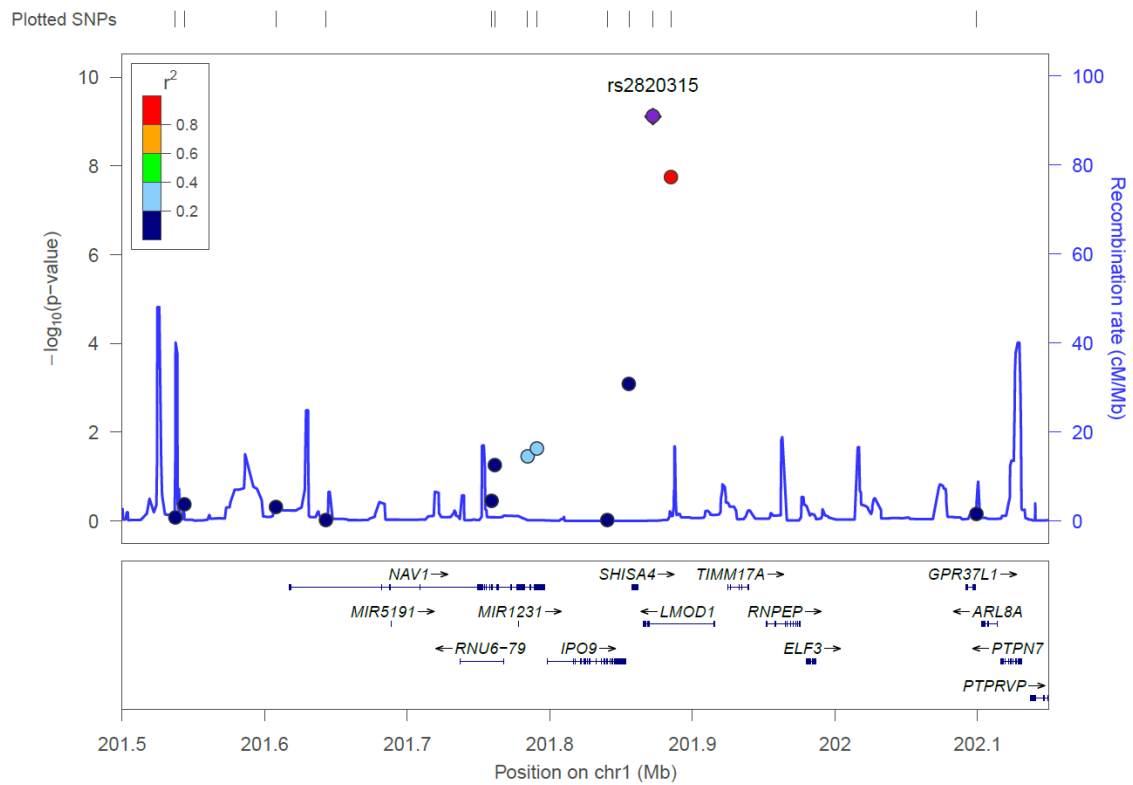

## TNS1

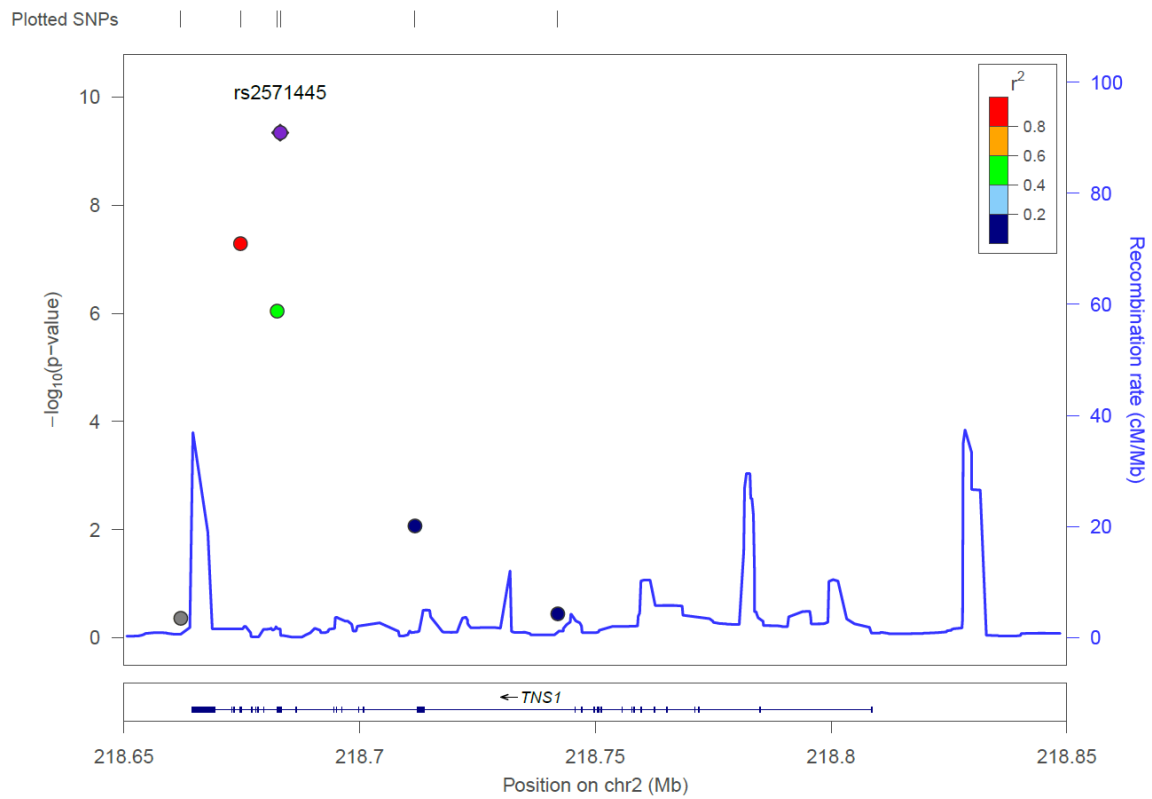

## ARHGAP26

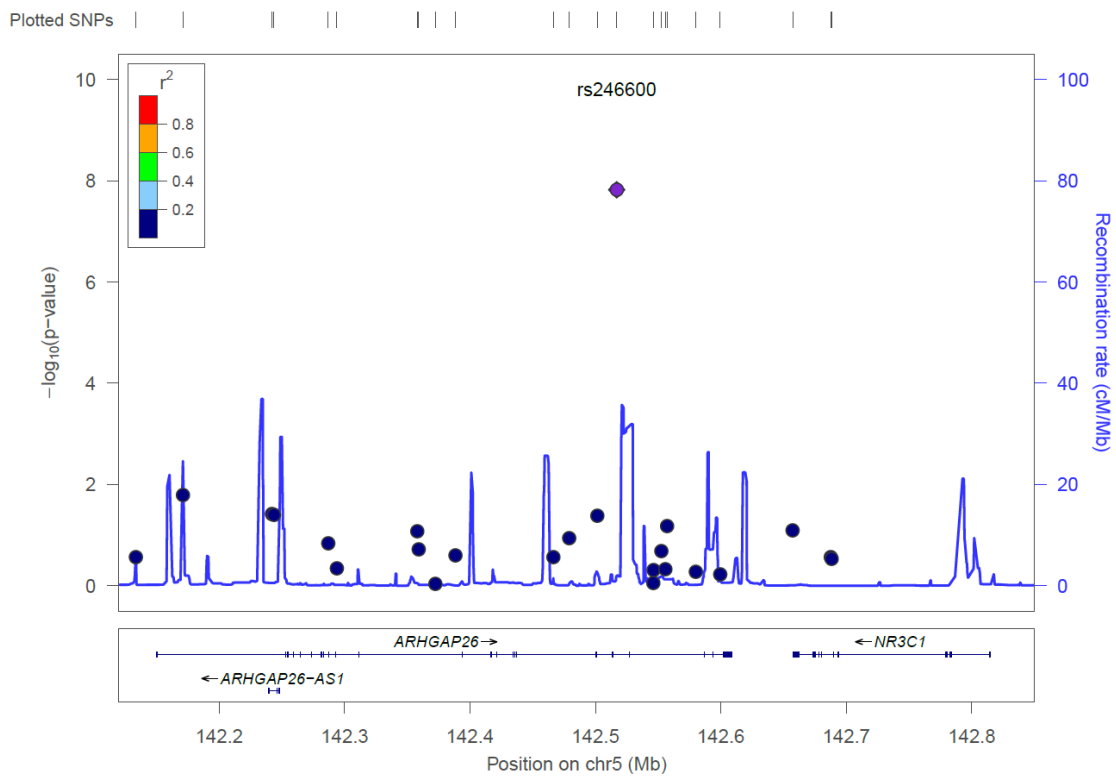

## PARP12

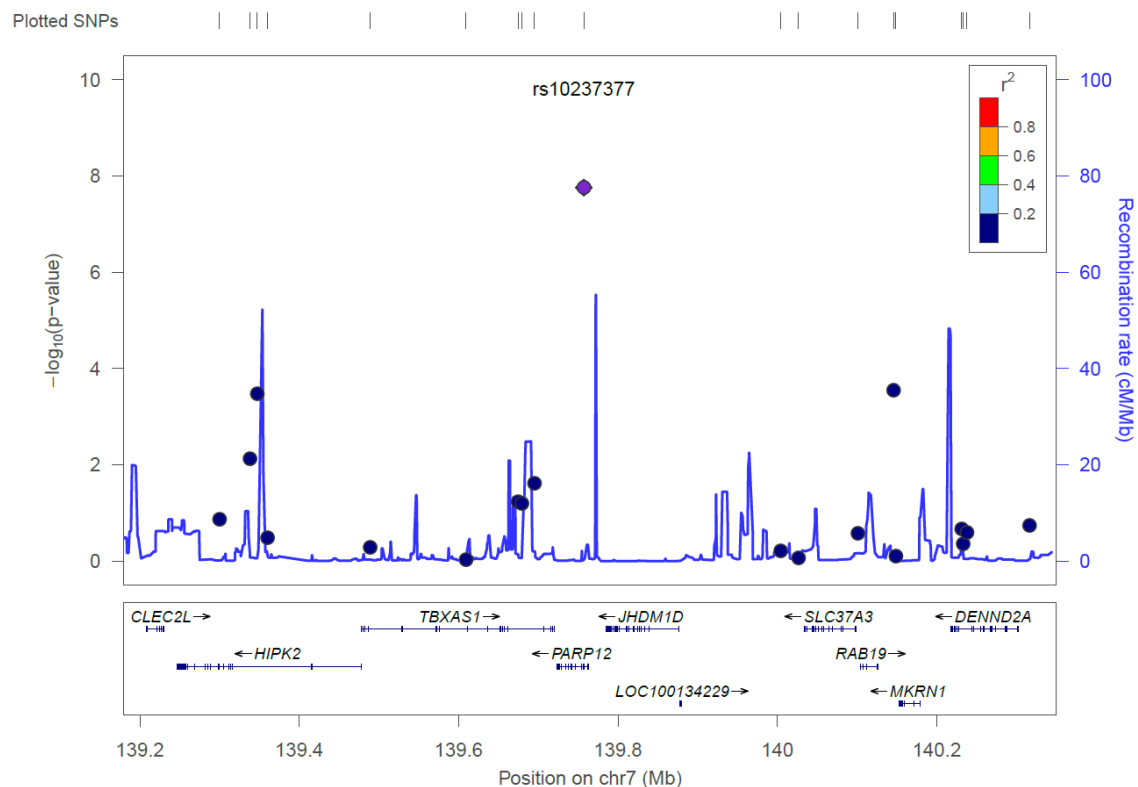

## PCNX3

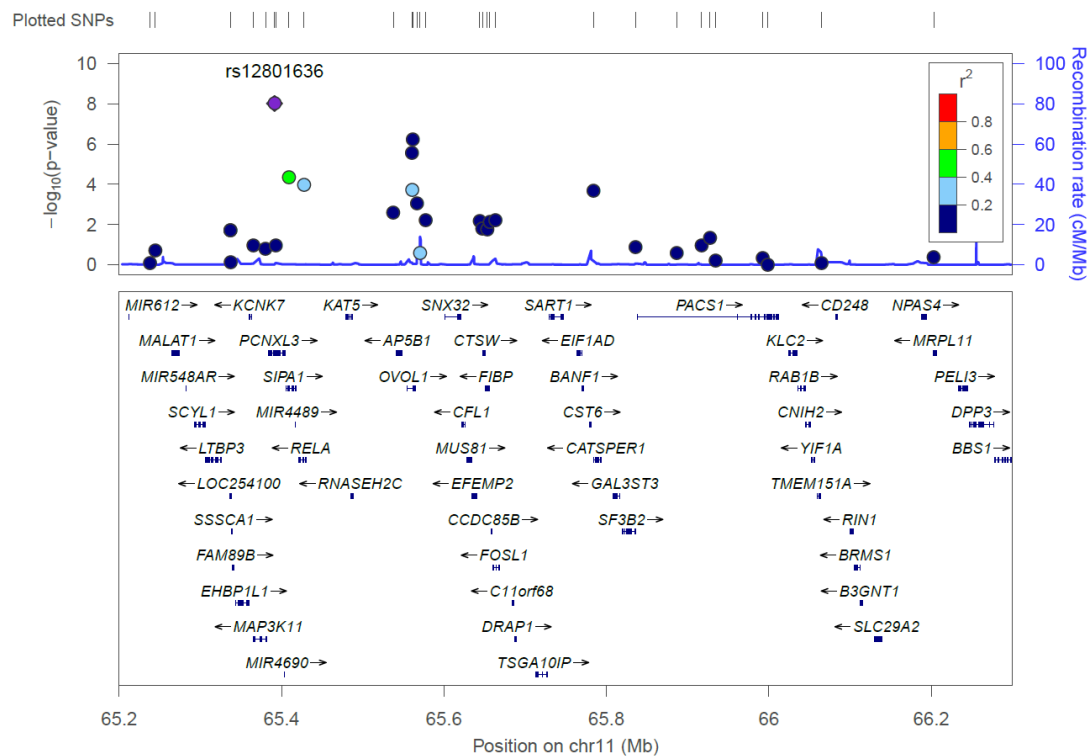

## SERPINH1

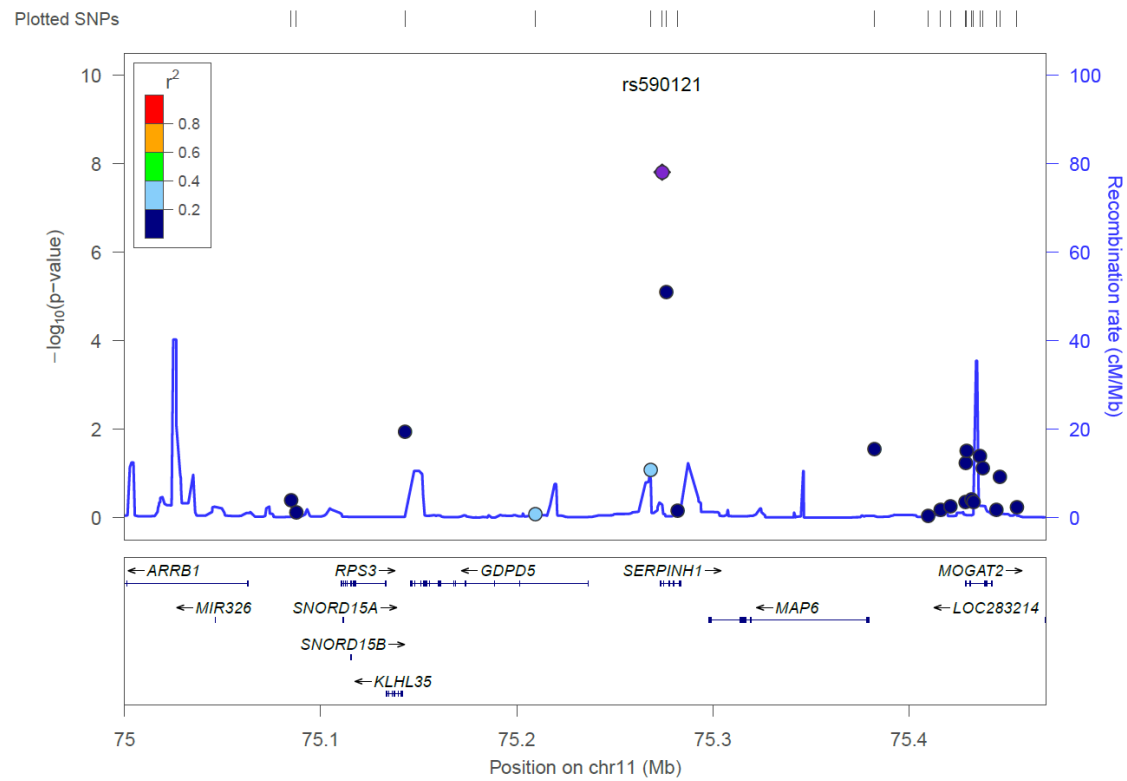

## C12orf43/HNF1A

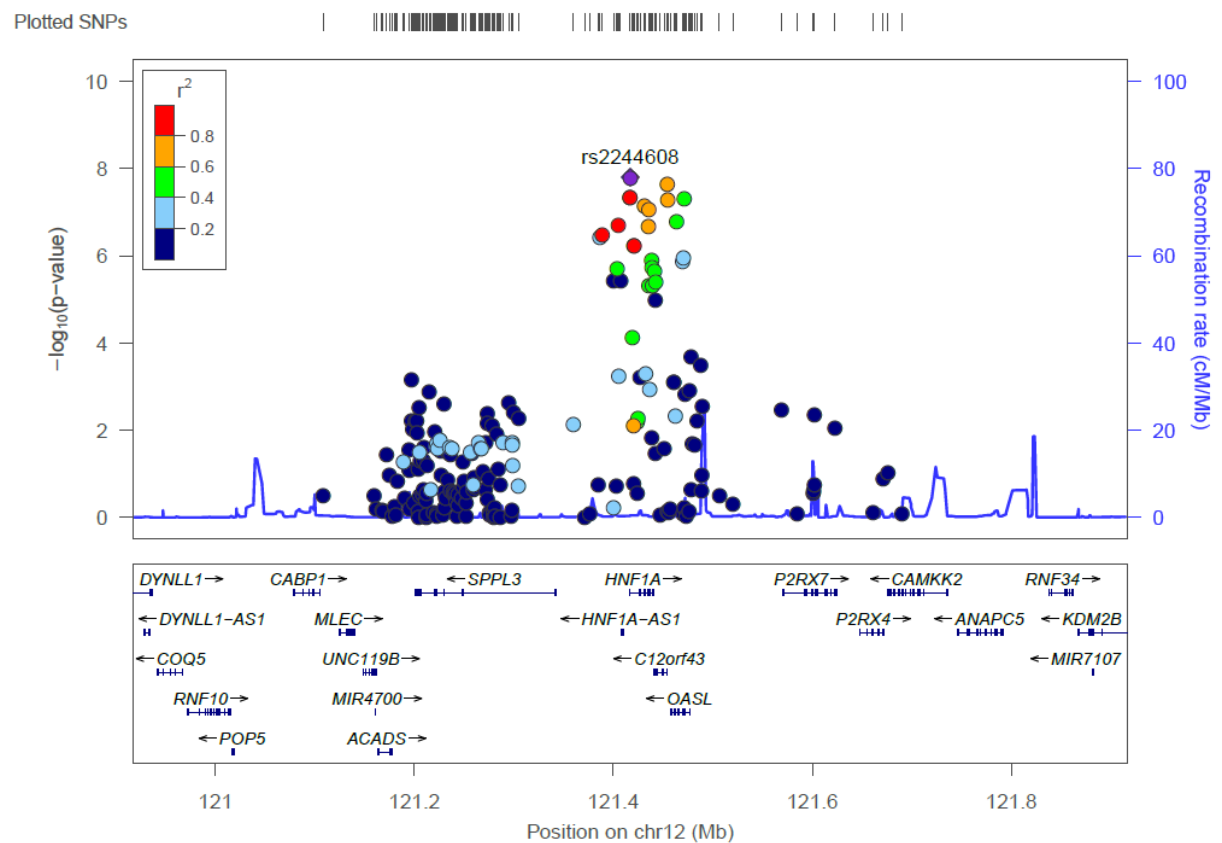

## SCARB1

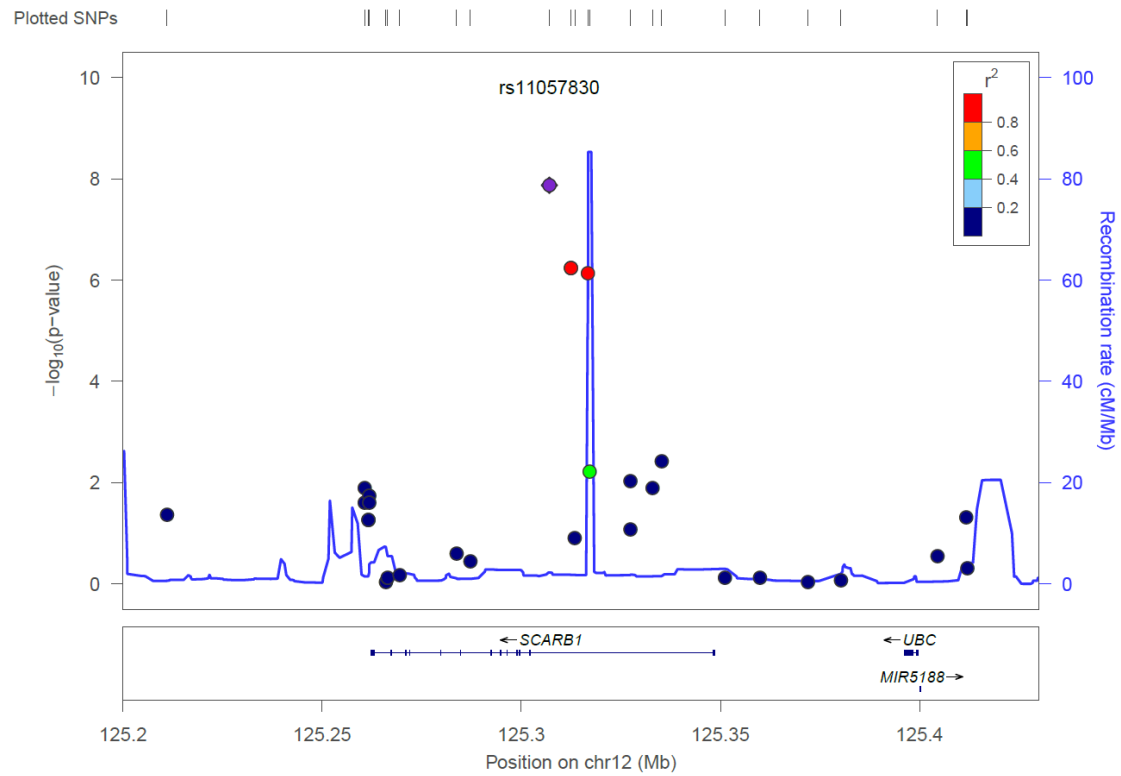

## OAZ2, RBPMS2

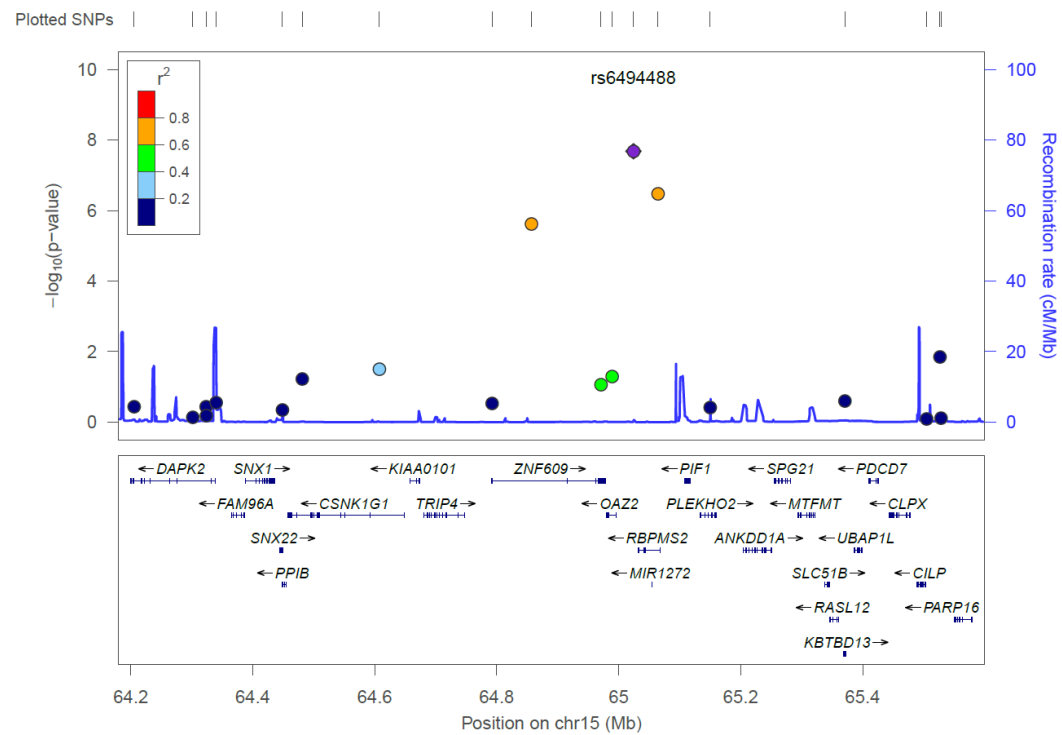

## DHX38

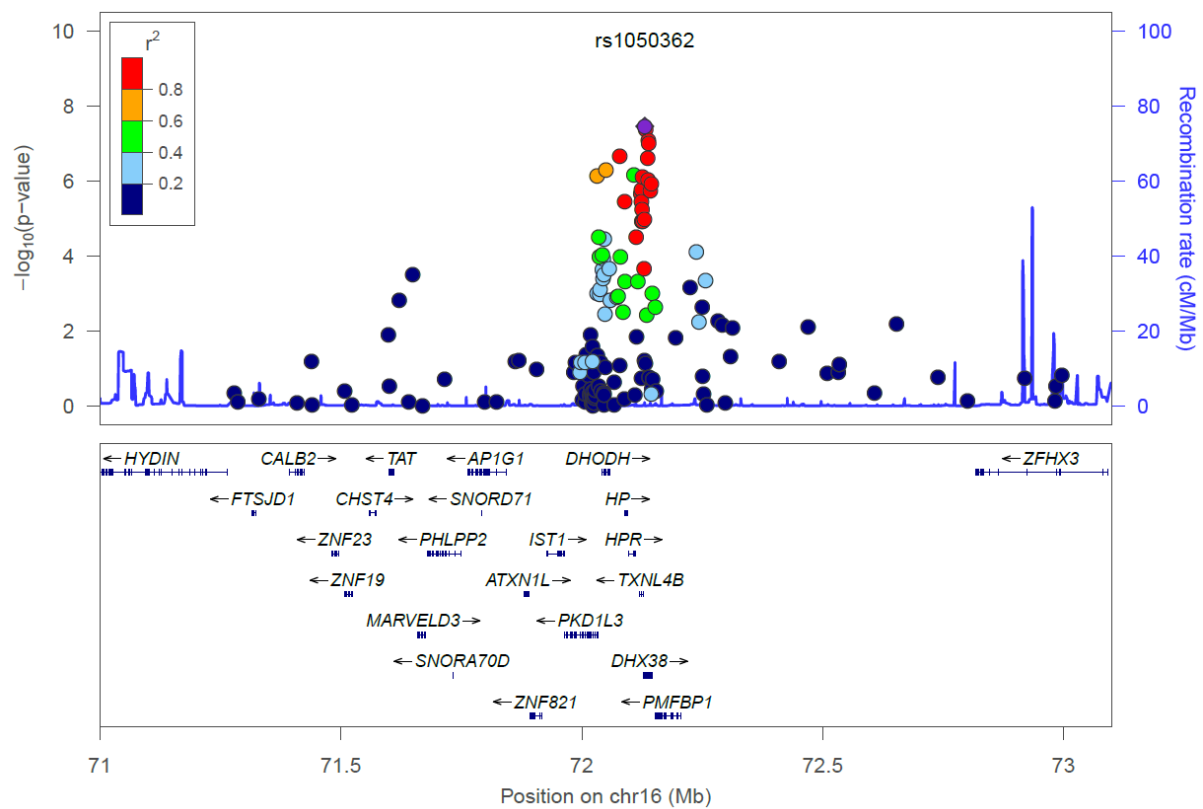

## GOSR2

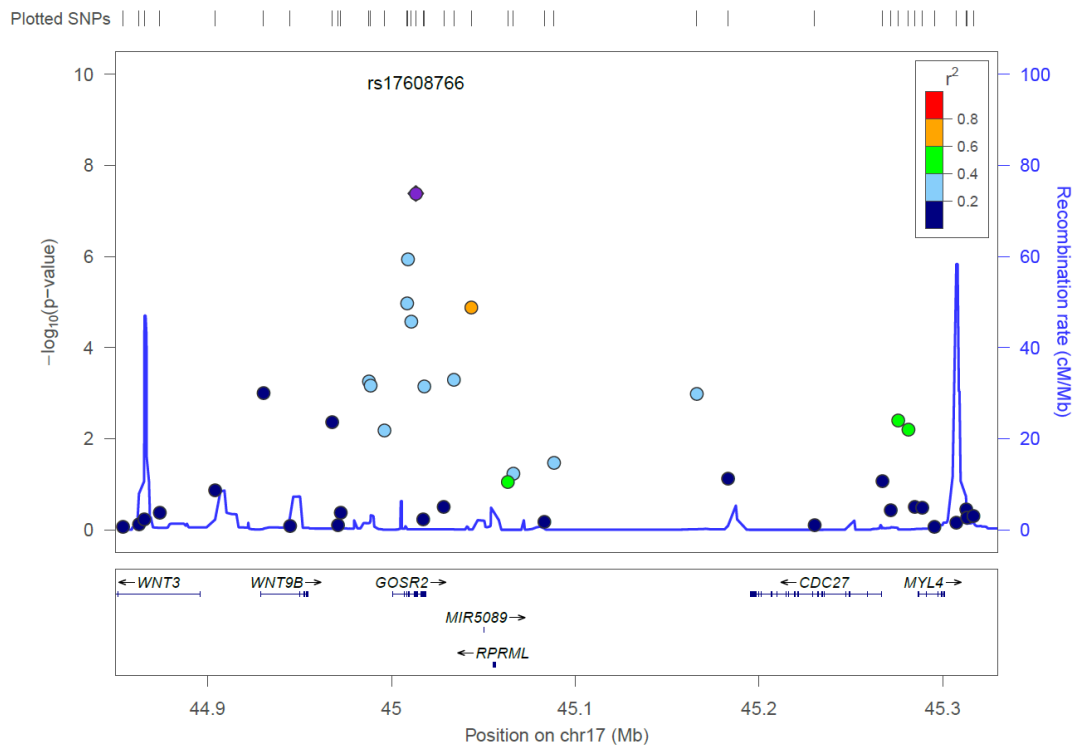

## PECAM1

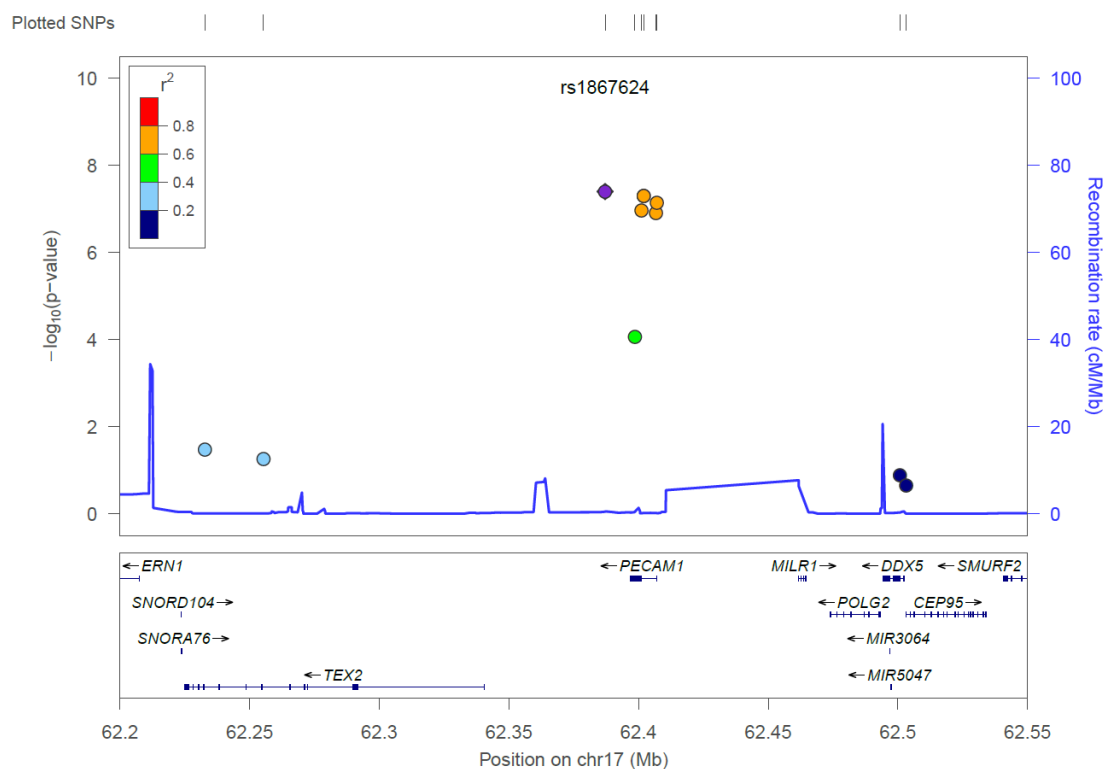

**Supplementary Figure 4(b)**

### *ATP1B1* (1000G)

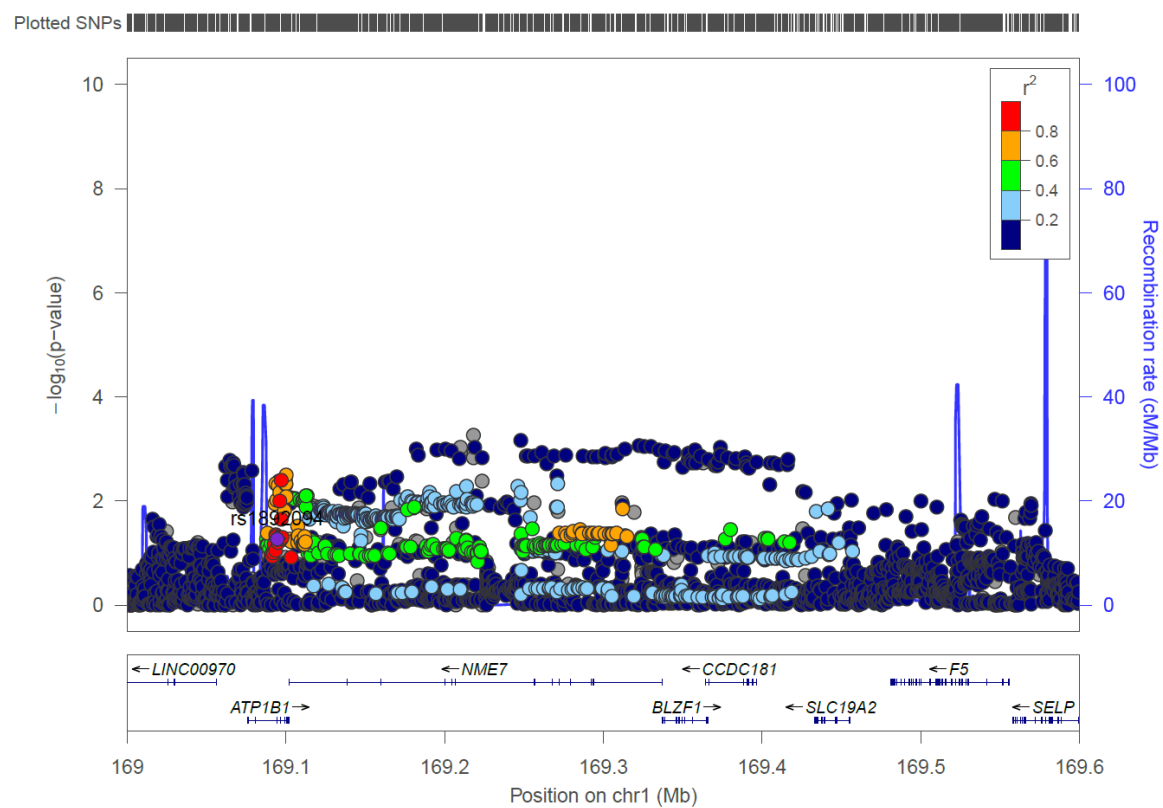

### DDX59/CAMSAP2 (1000G)

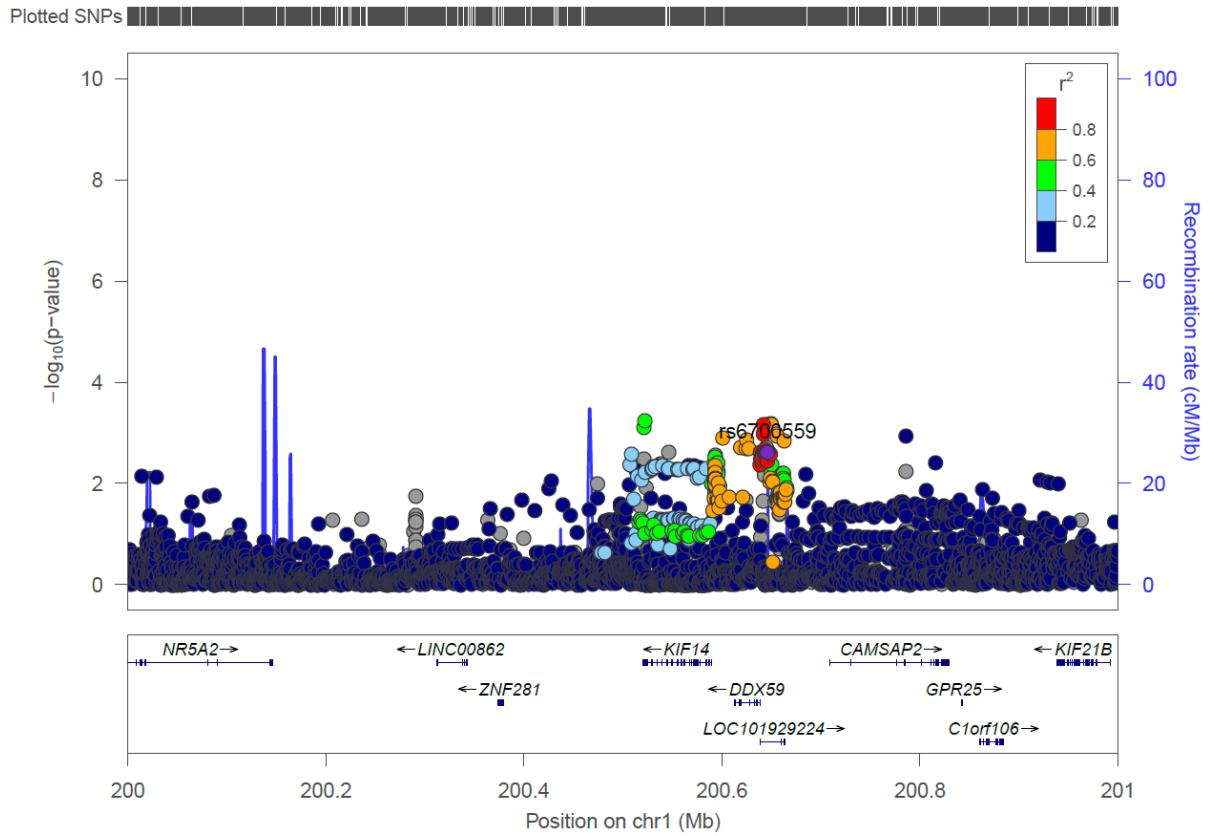

### LMOD1 (1000G)

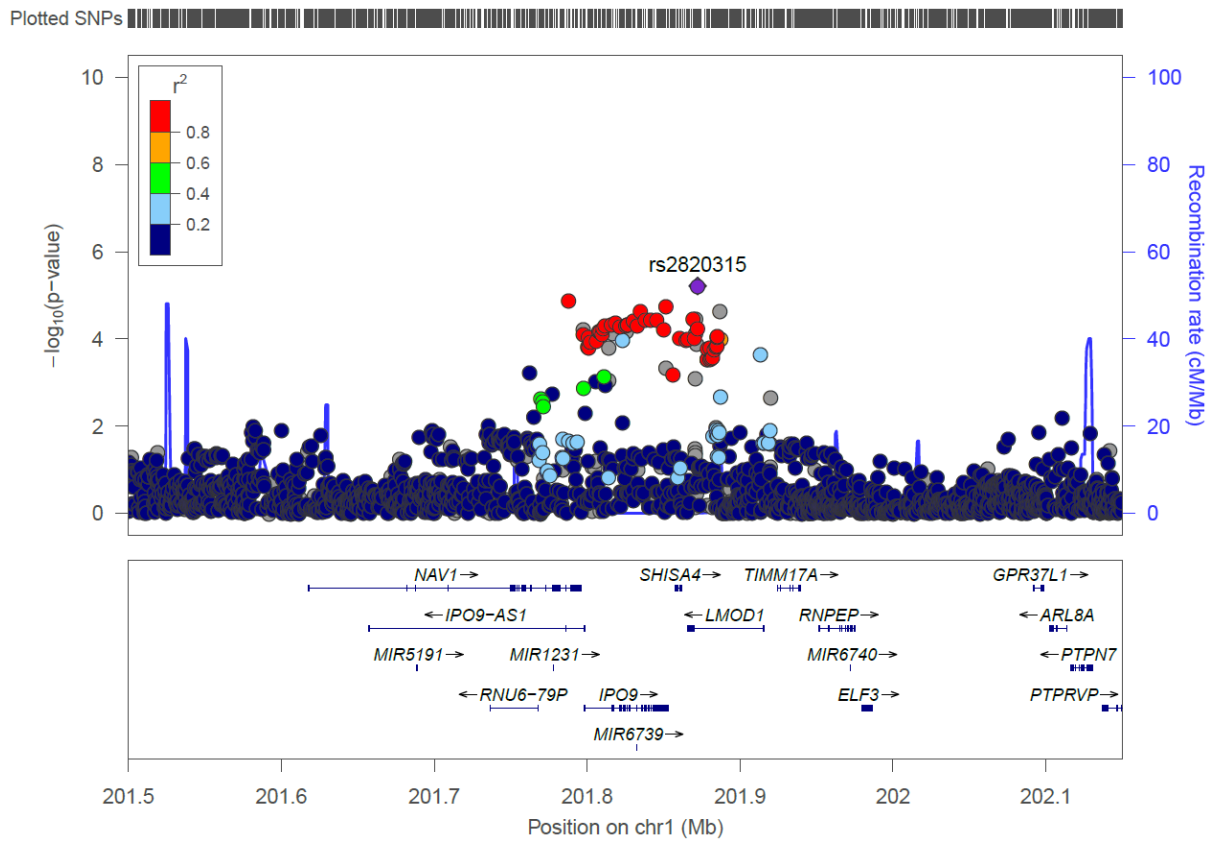

## ***TNSI* (1000G)**

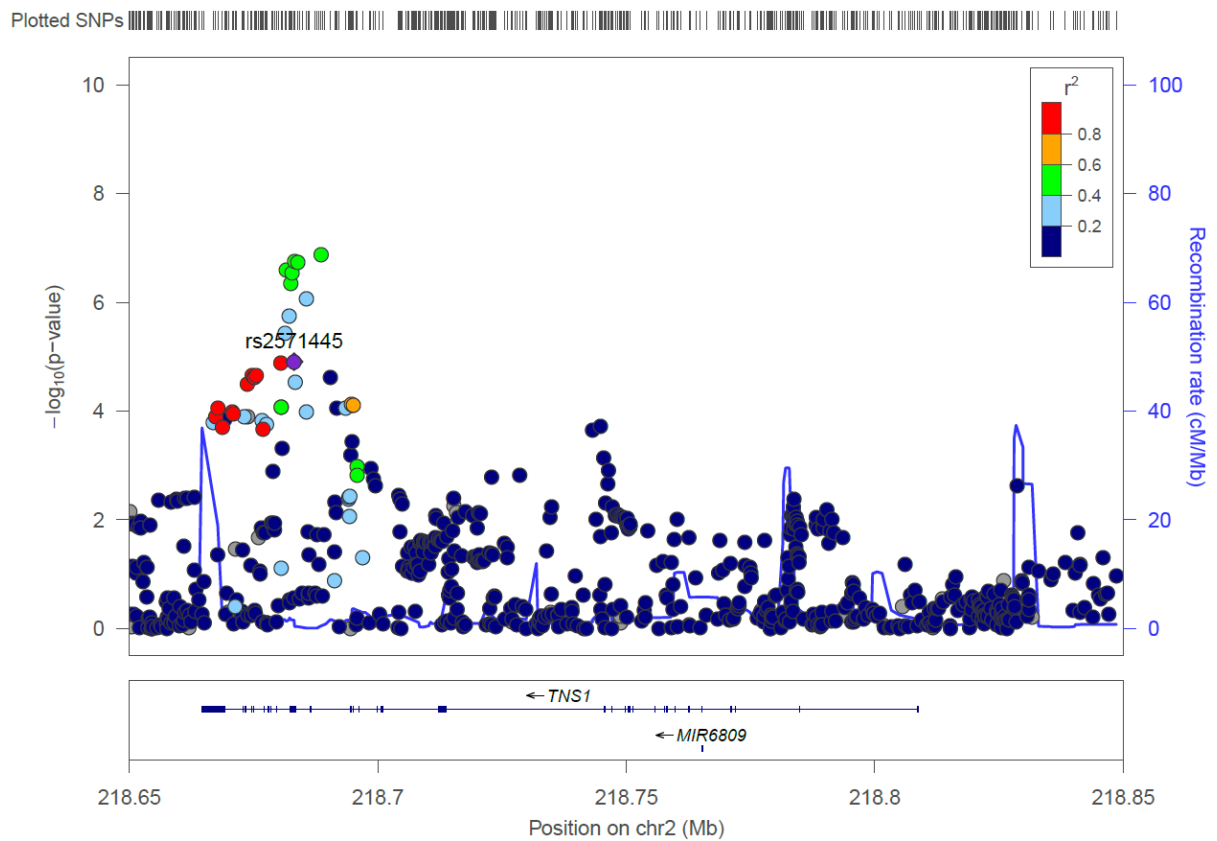

## ***ARHGAP26* (1000G)**

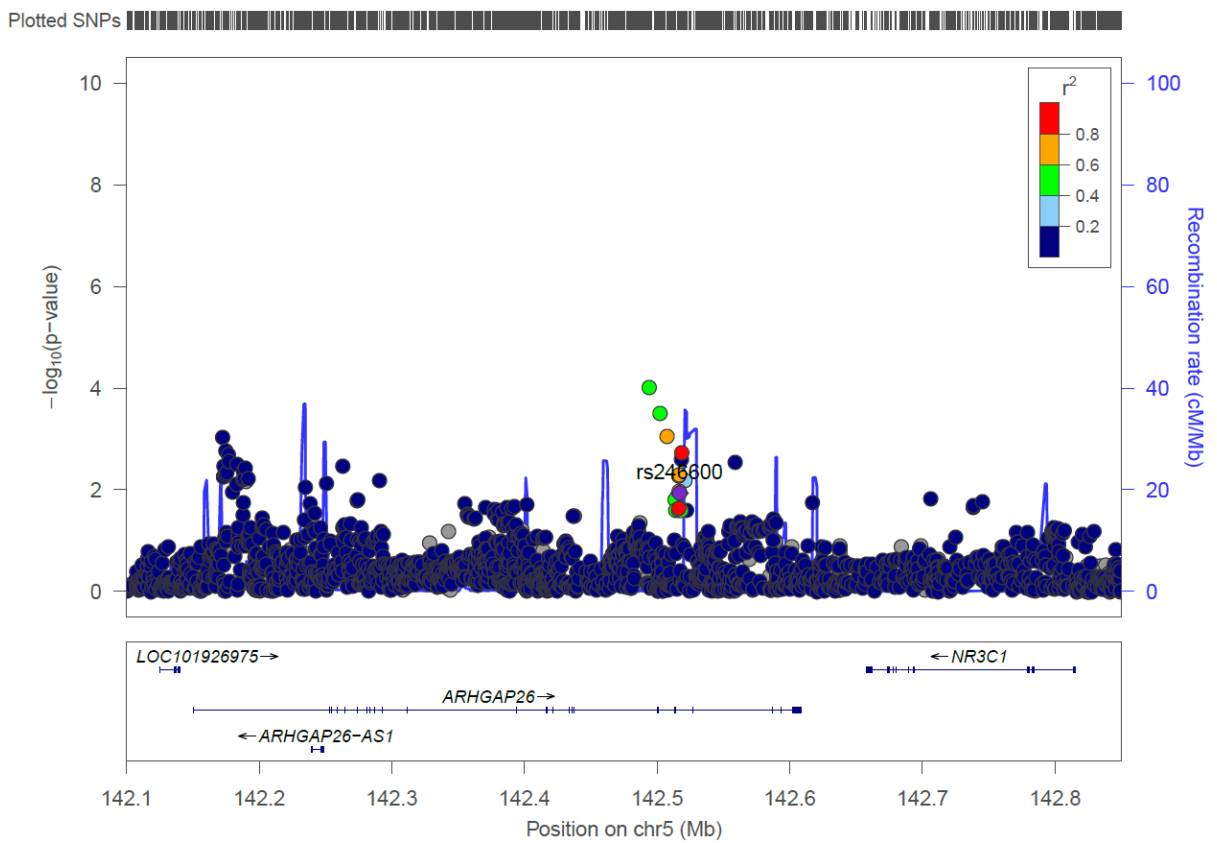

## PARP12 (1000G)

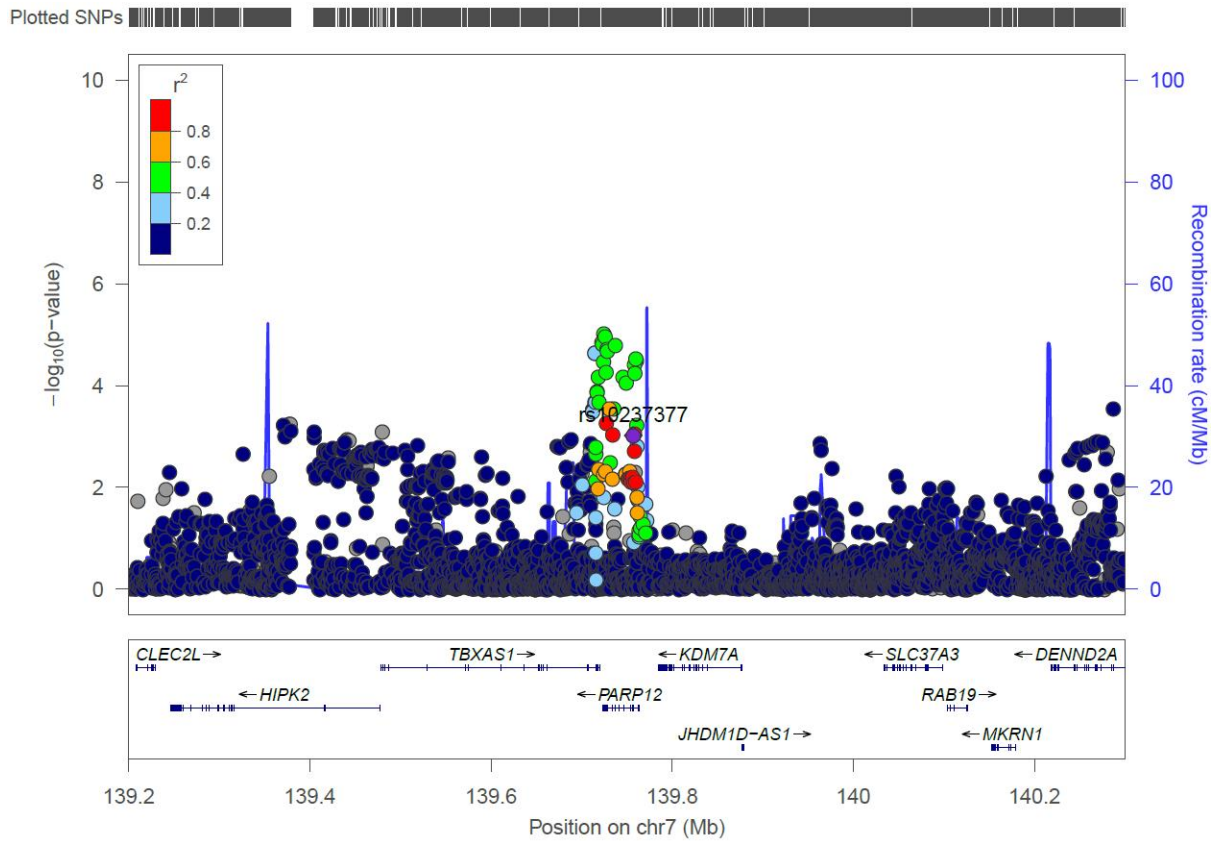

## PCNX3 (1000G)

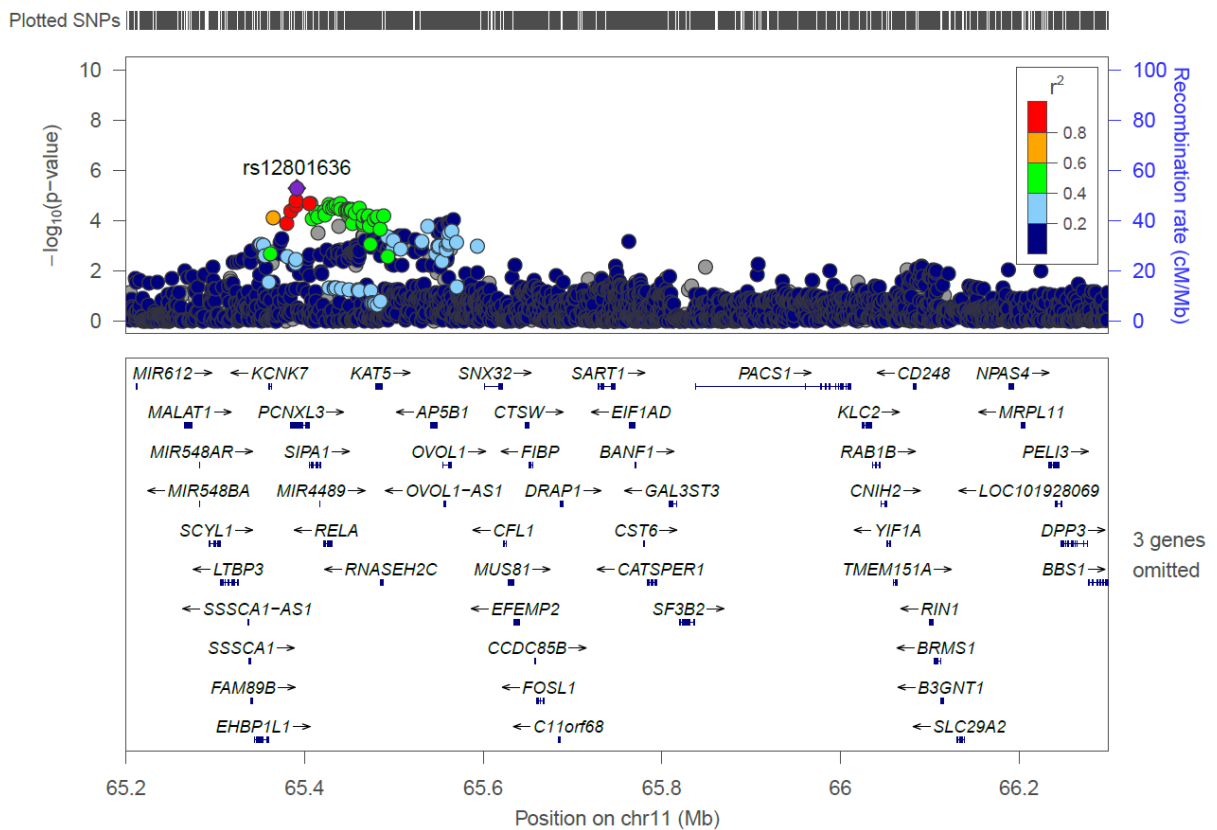

## ***SERPINH1* (1000G)**

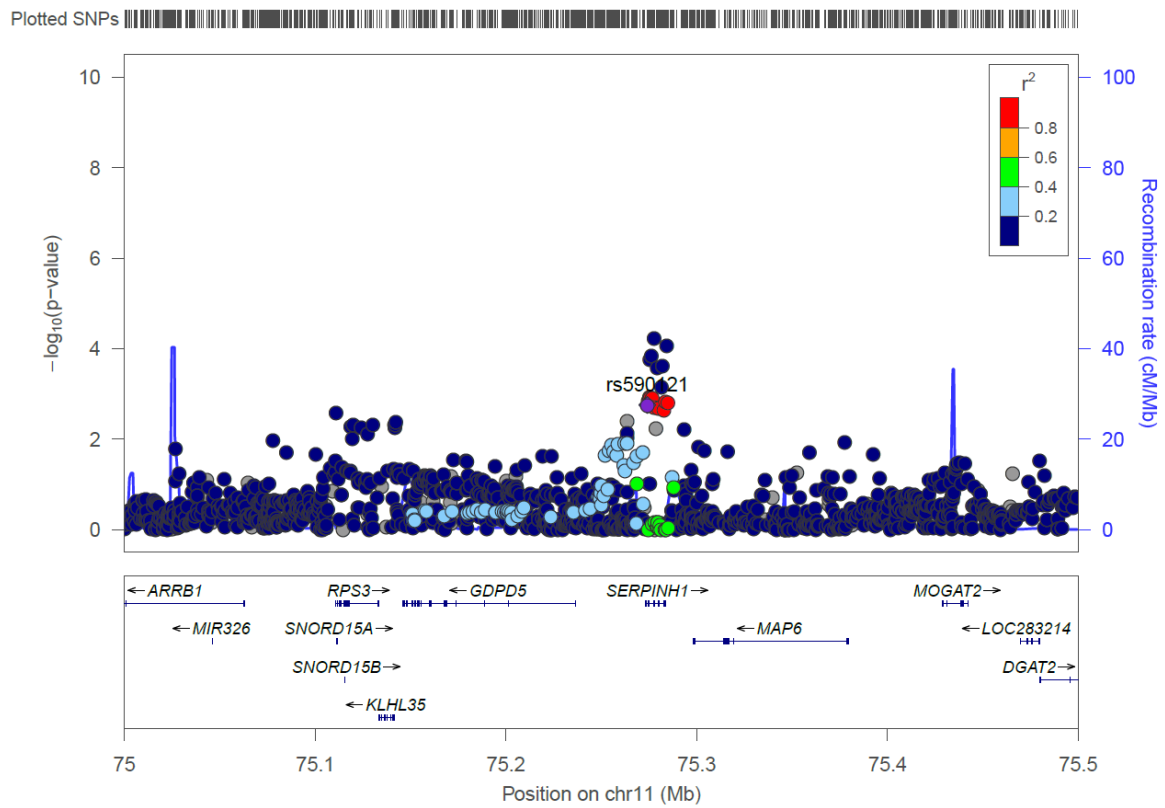

## ***C12orf43/HNF1A* (1000G)**

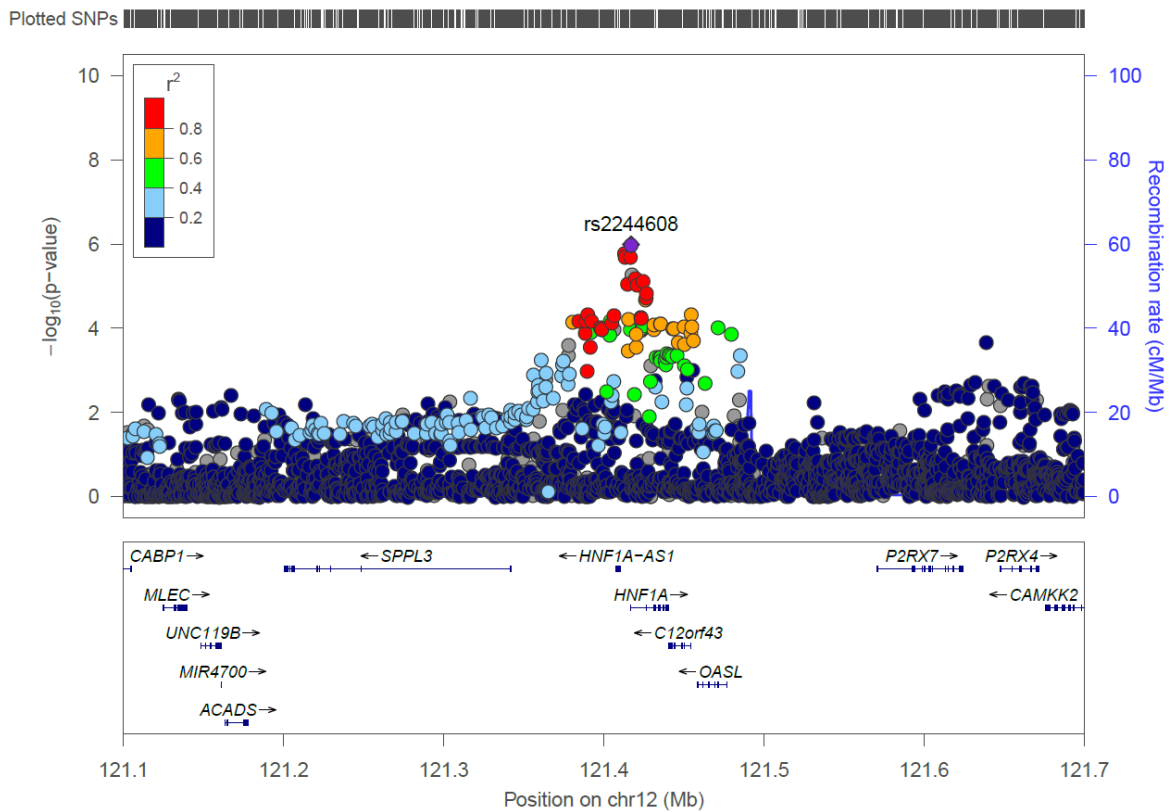

## SCARB1 (1000G)

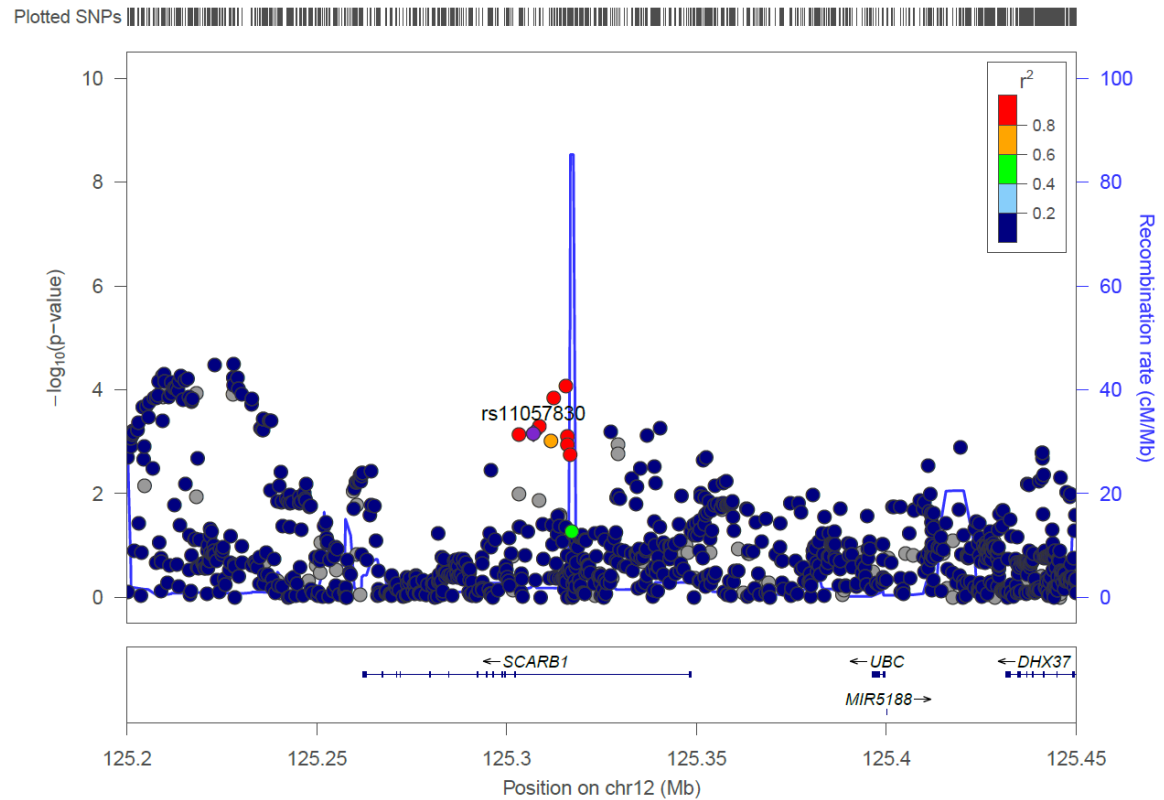

## OAZ2, RBPMS2 (1000G)

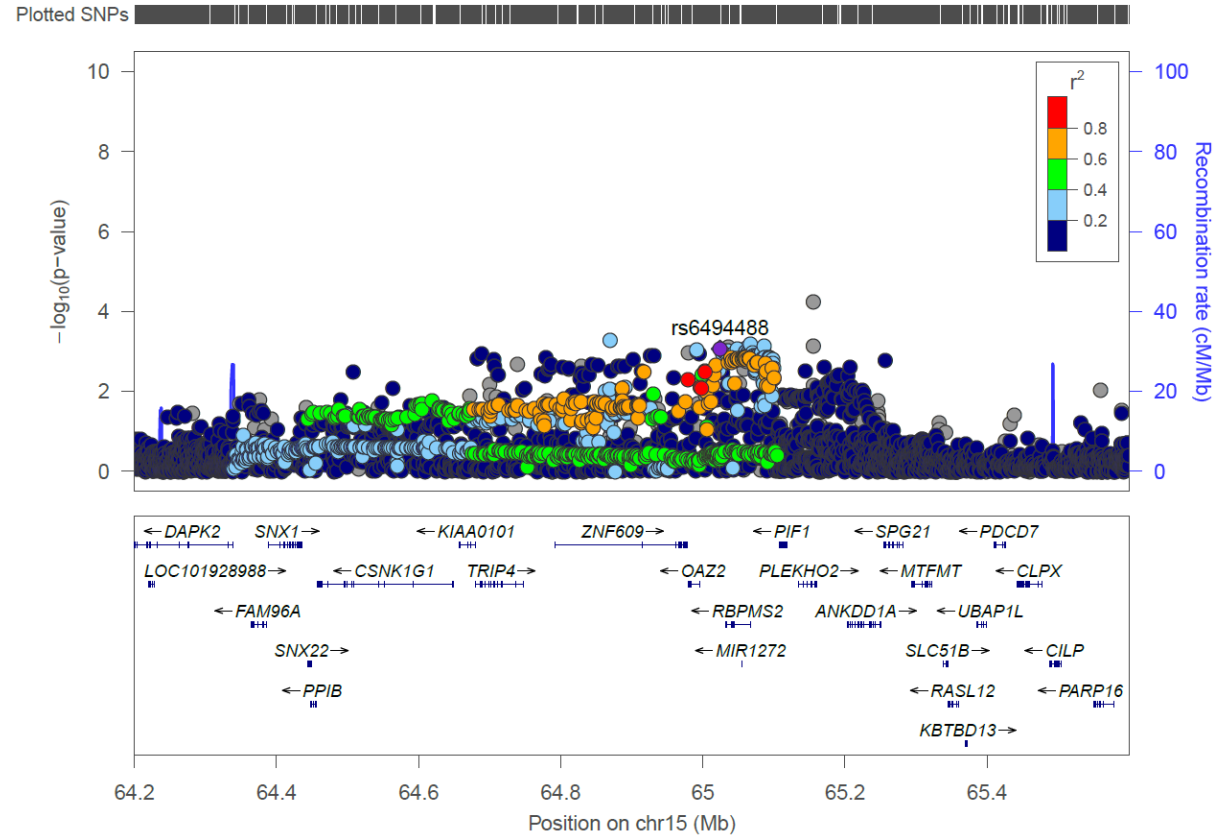

## DHX38 (1000G)

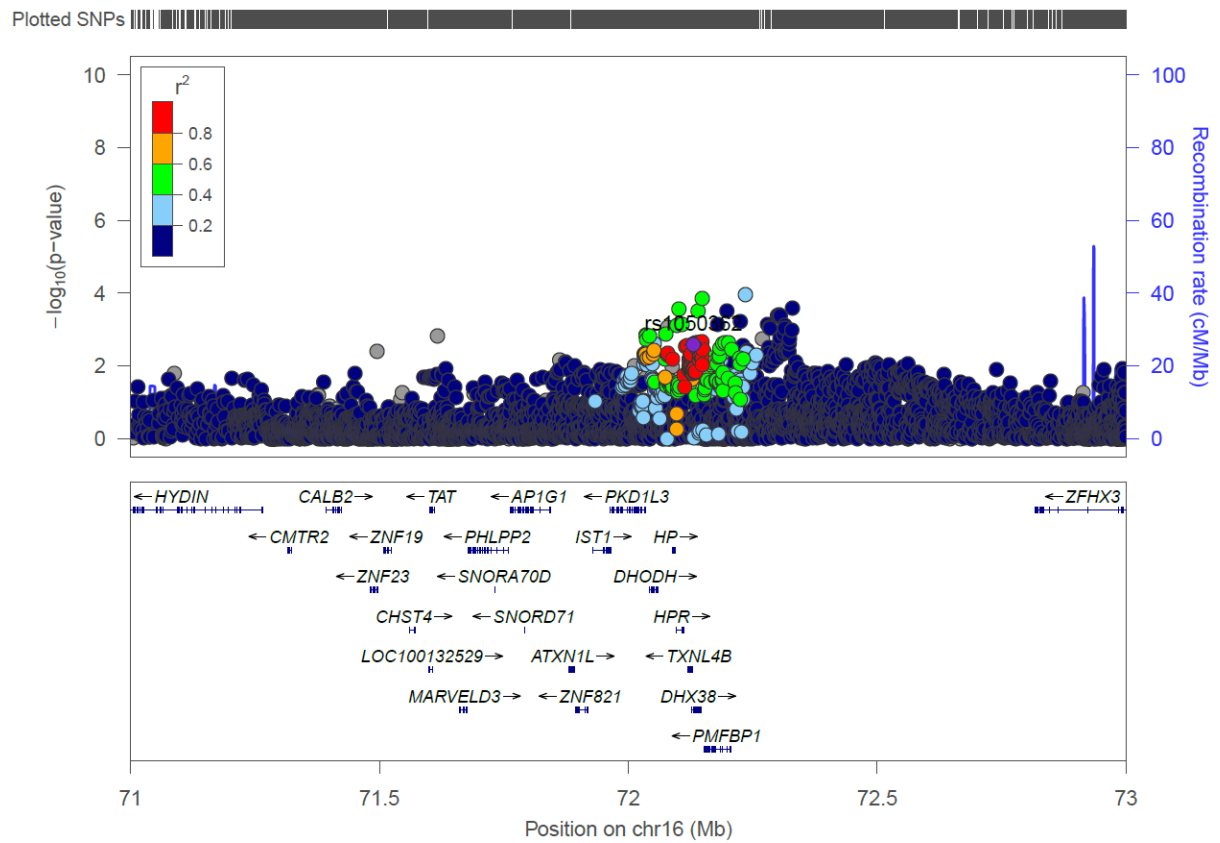

## GOSR2 (1000G)

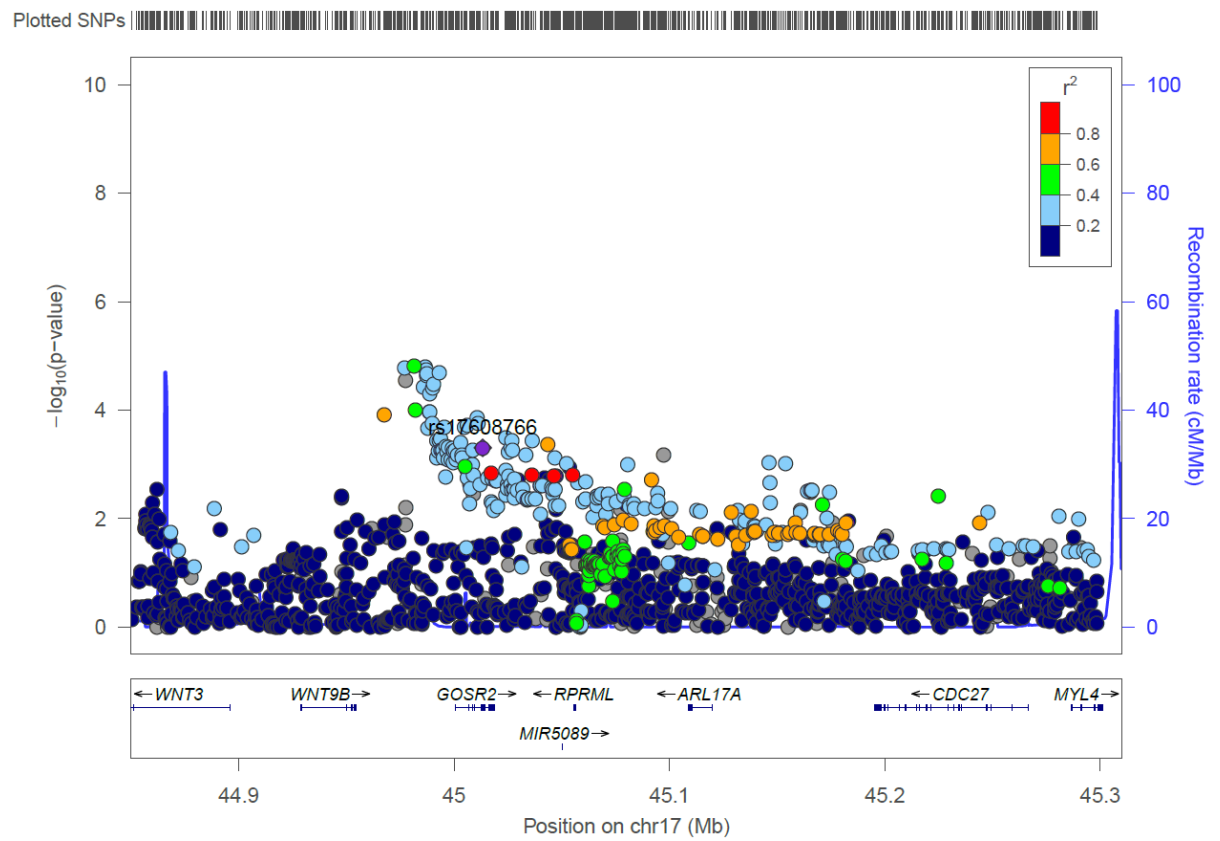

## PECAMI (1000G)

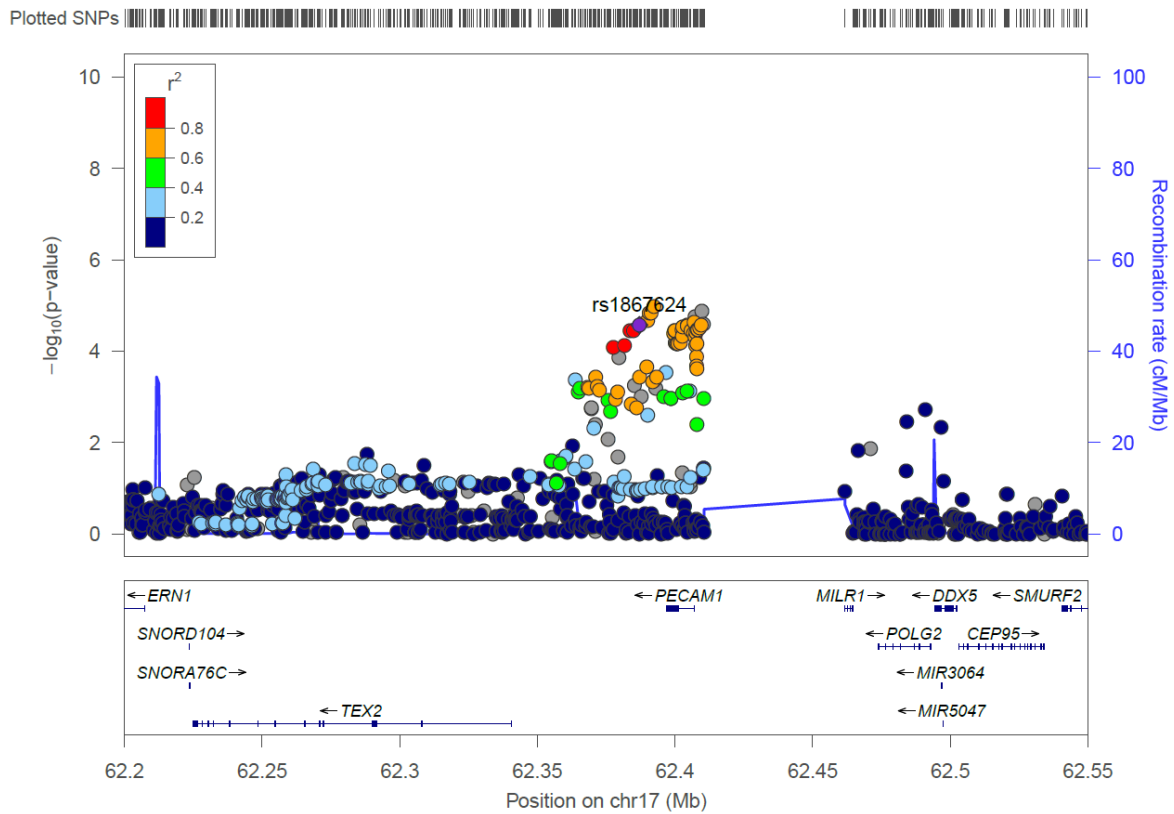

## PROCR (1000G)

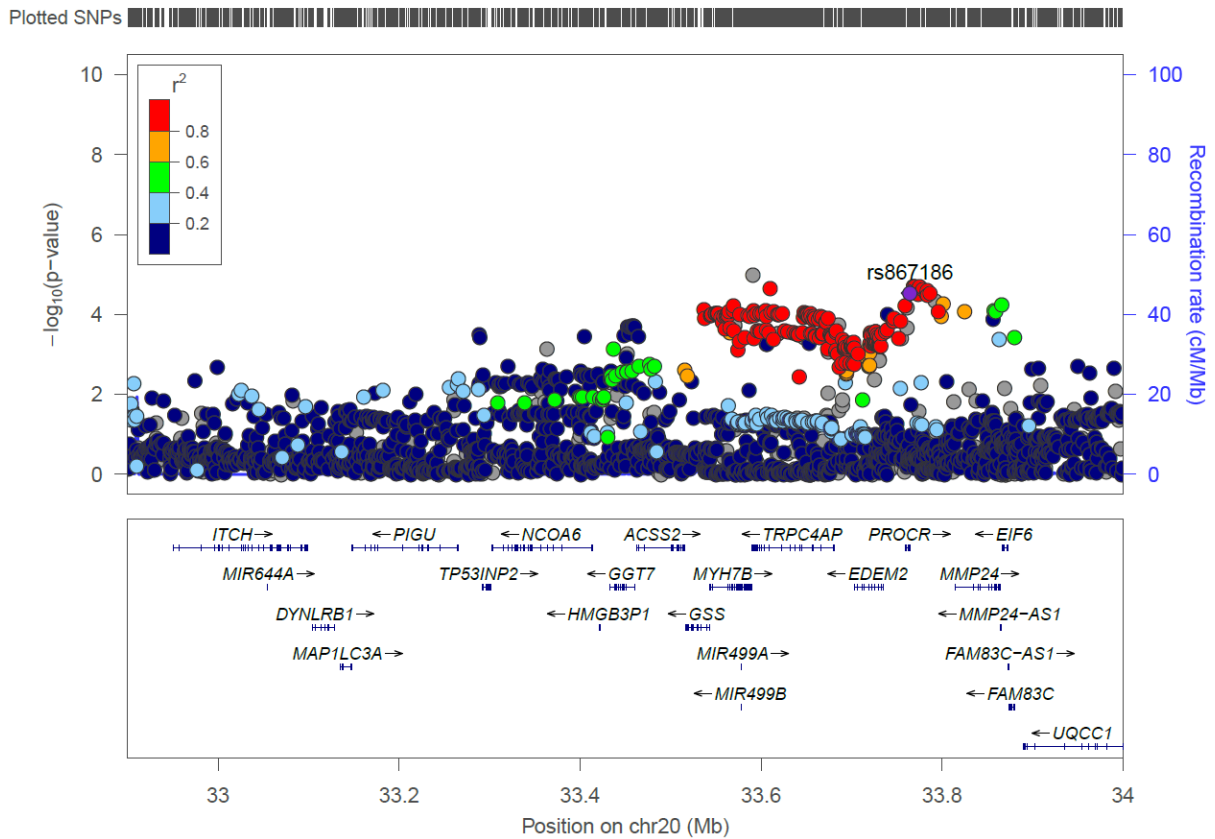

**Supplementary Figure 5:** Manhattan plot for the association of the Metabochip SNPs in the studies with *de novo* genotyping (a) European studies, CGPS/CIHDS, CCHS, EPIC-CVD, EPIC-Umea (b) the South Asian studies, BRAVE and PROMIS (c) the African American samples from MIGN, WHI, and ARIC (d) the East Asian studies, TAICHI.  $-\log(P=5 \times 10^{-8}) \sim 7.3$ . Note these plots are across the whole CardioMetabochip and excluded the published CARDIoGRAMplusC4D data.

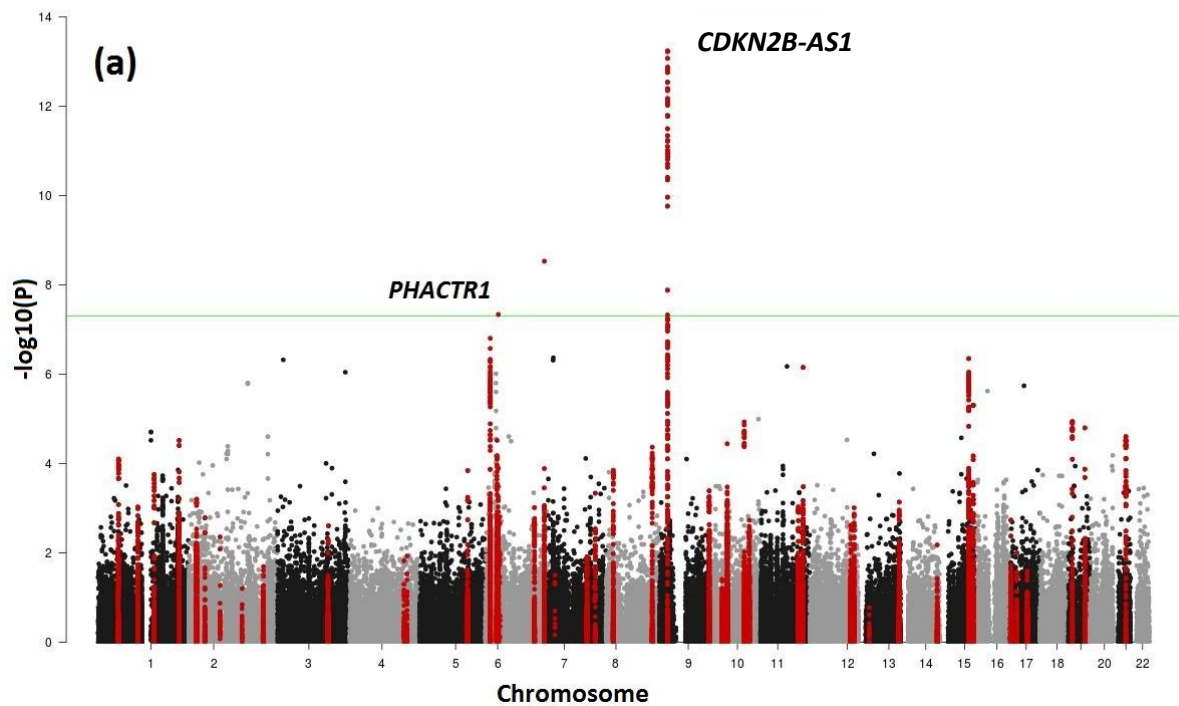

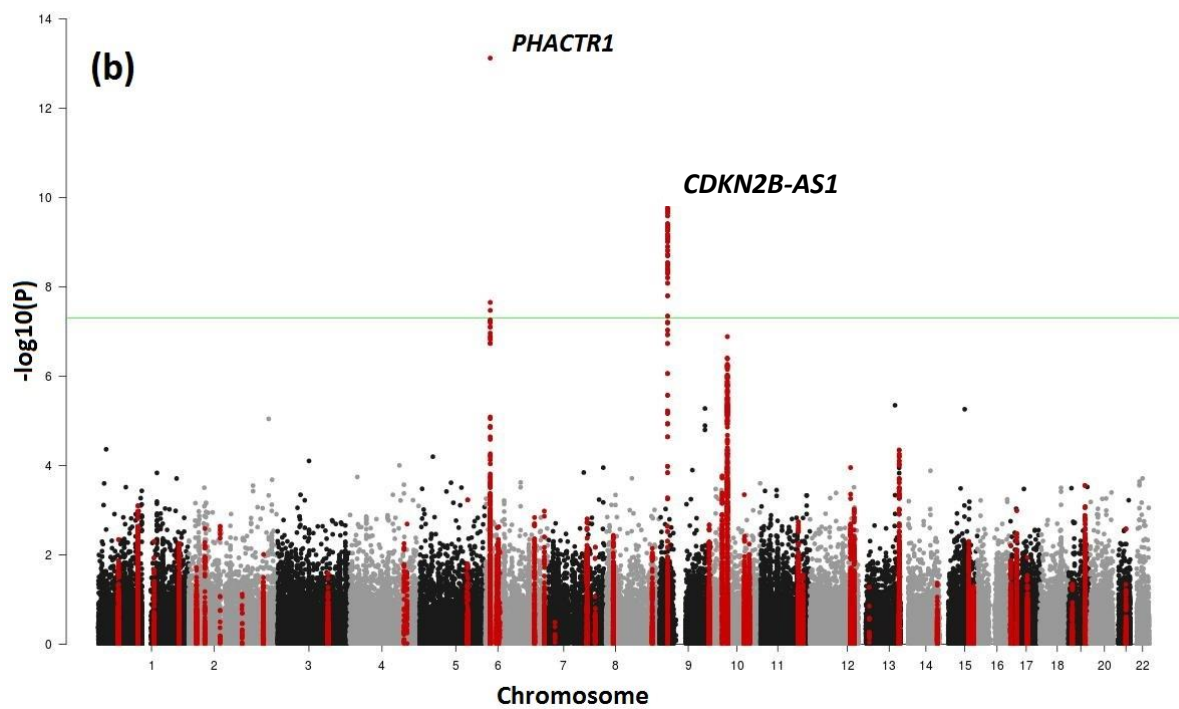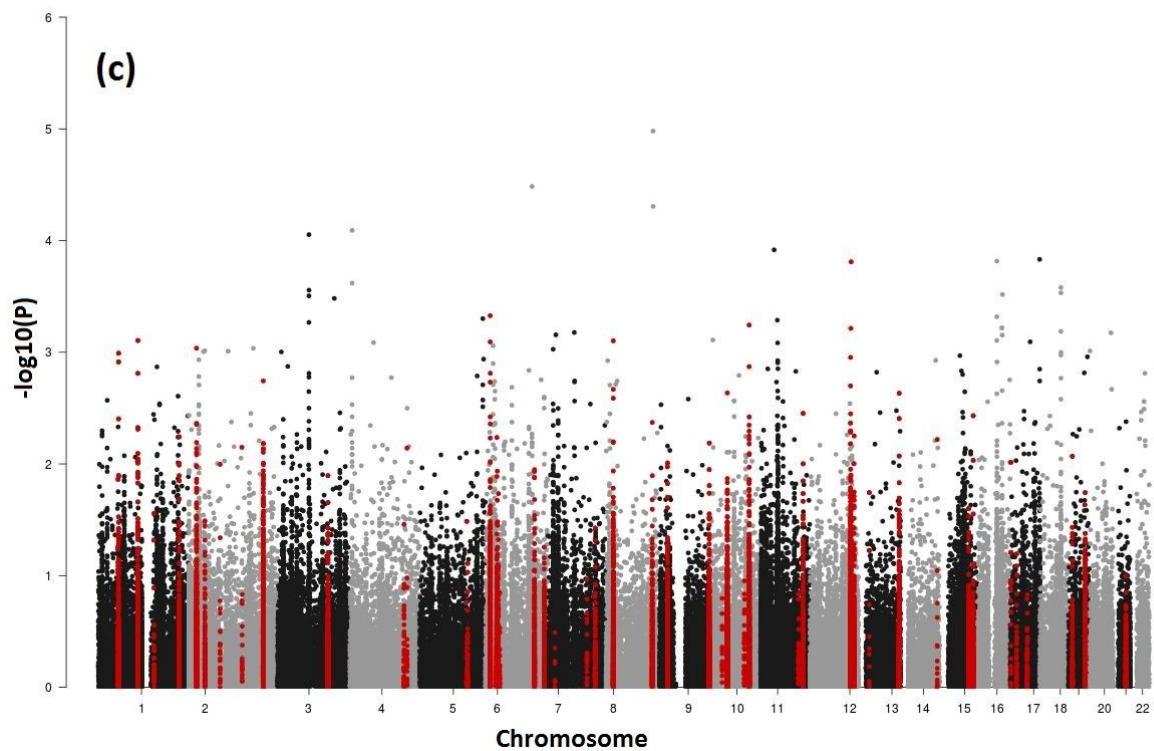

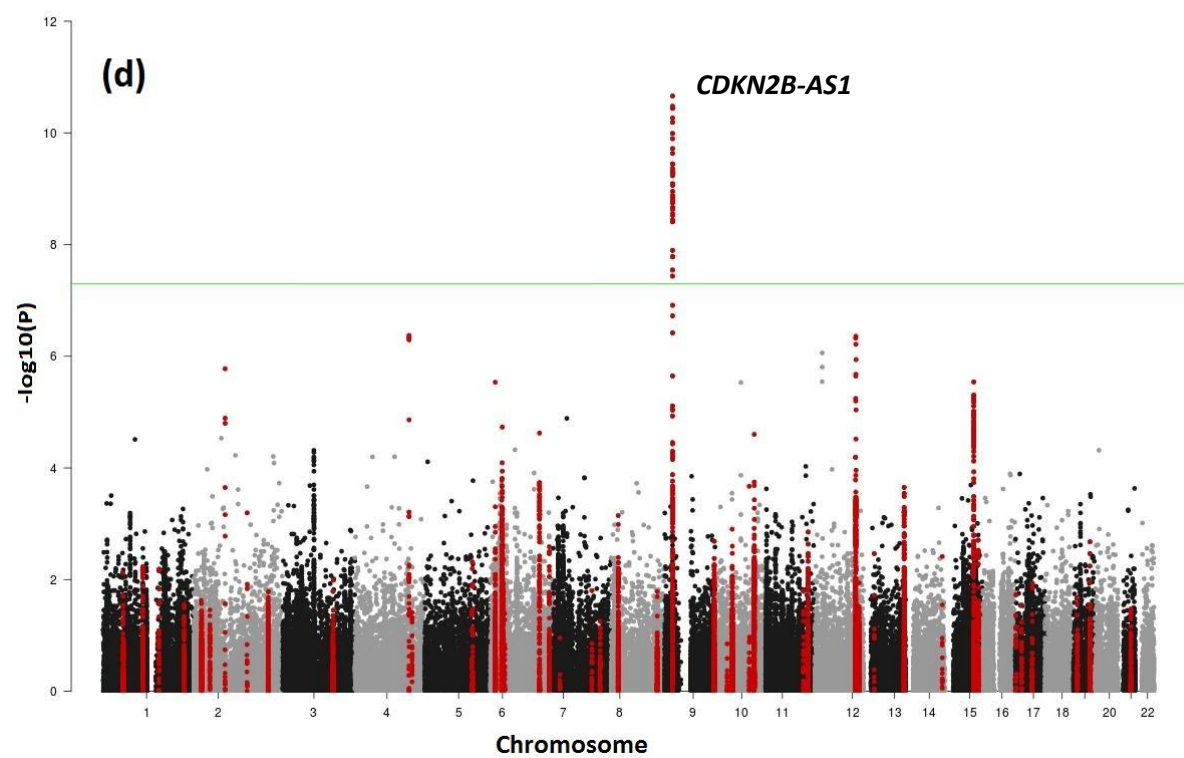

**Supplementary Figure 6** *SCARB1* regional association plots with (a) CAD (b) HDL<sup>2</sup> (c) LDL<sup>2</sup> and (d) triglycerides<sup>2</sup>. Physical position is given for GRCh37. The  $r^2$  information was from the 1000 Genome phase3 v5 EUR samples.

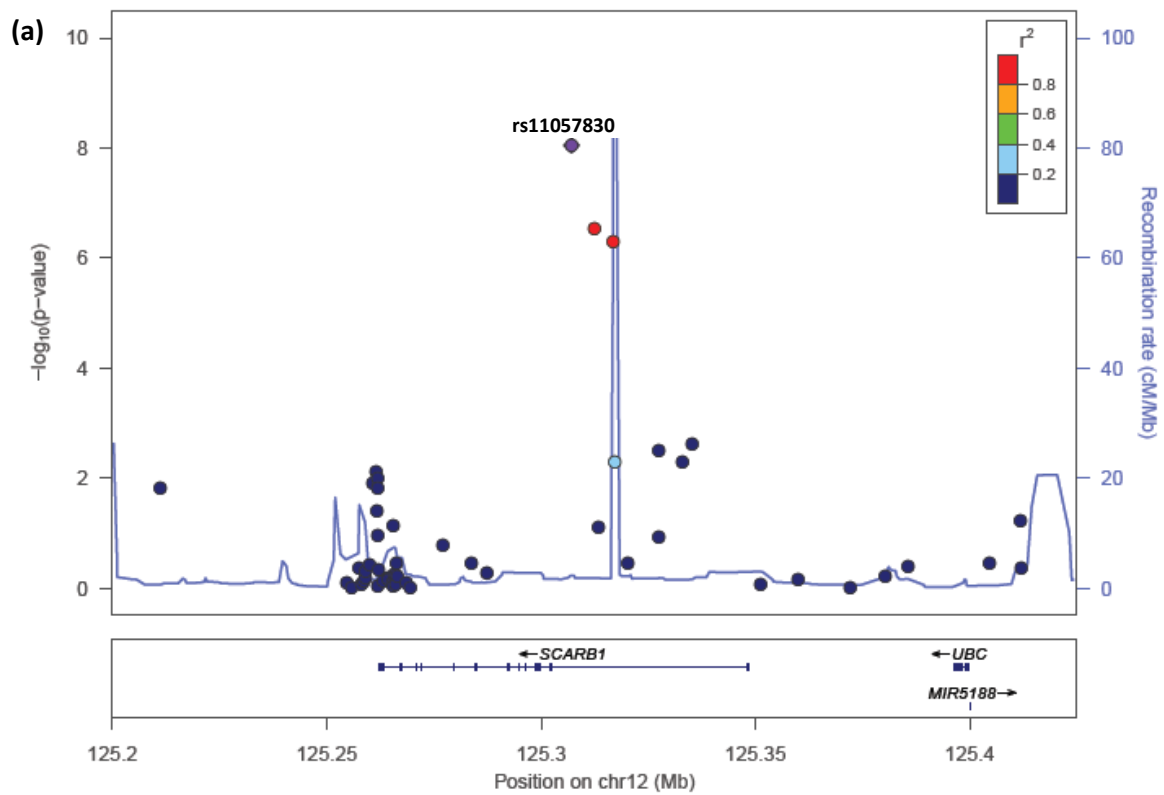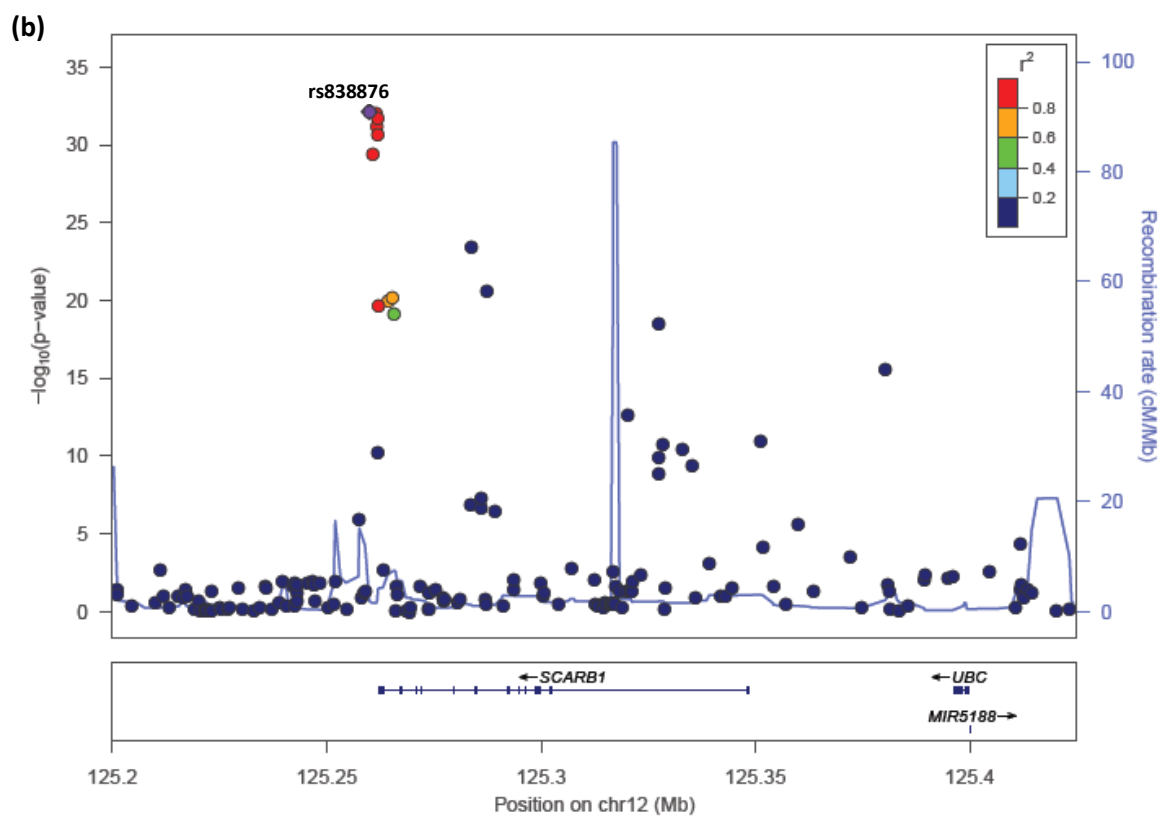

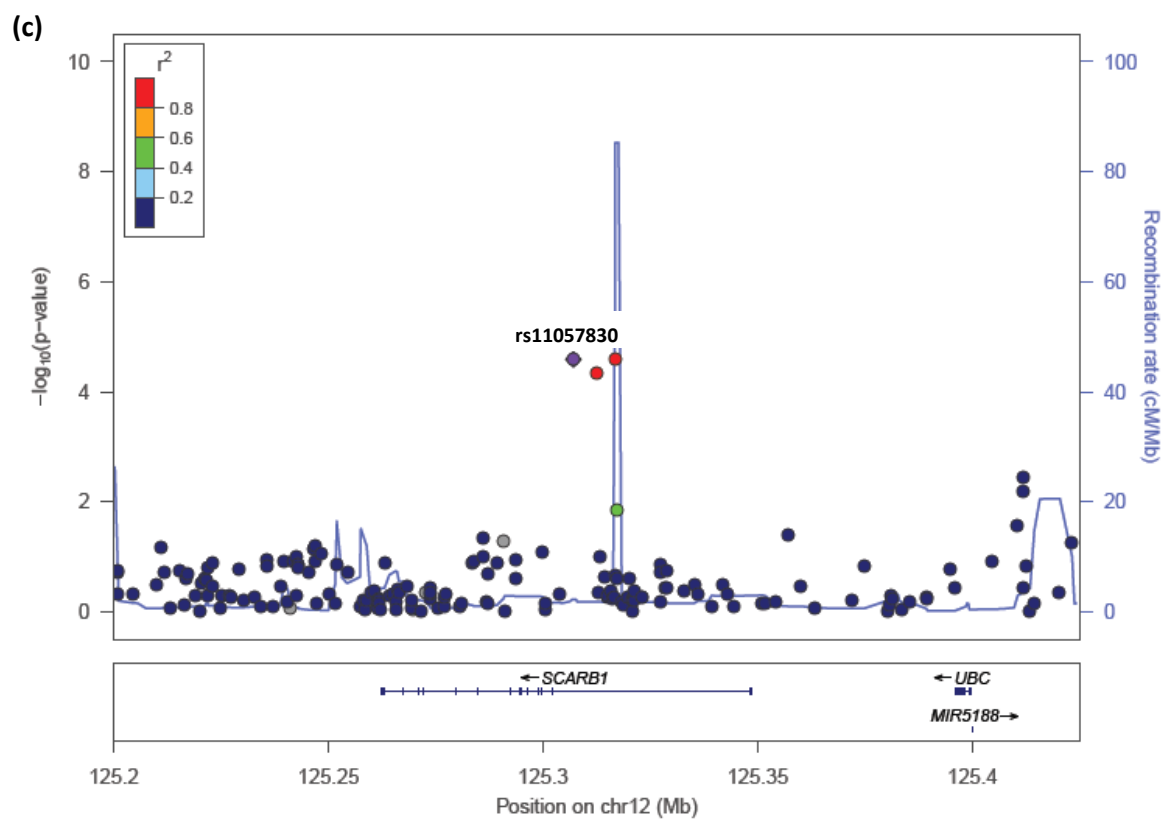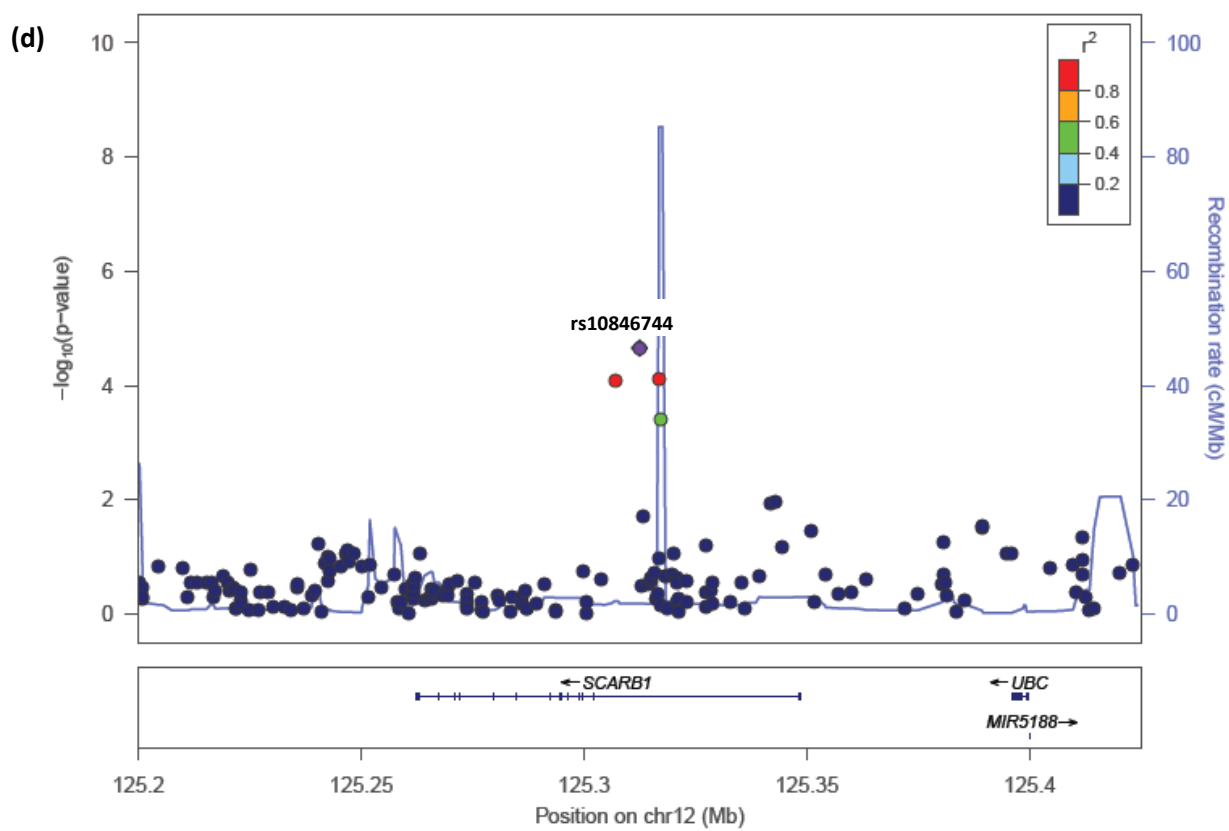

A

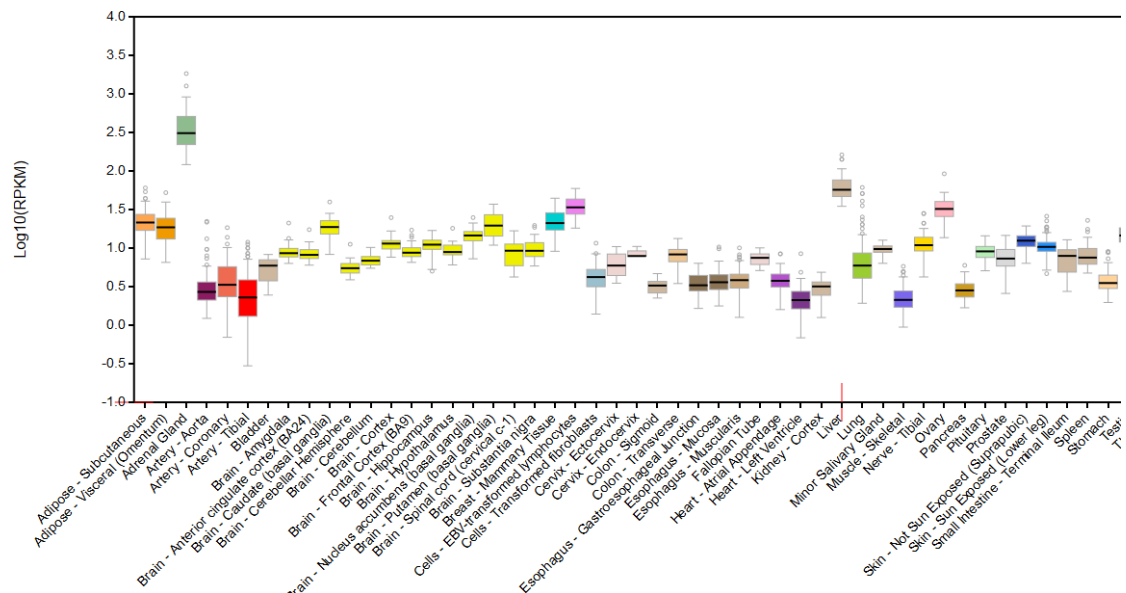

**B**

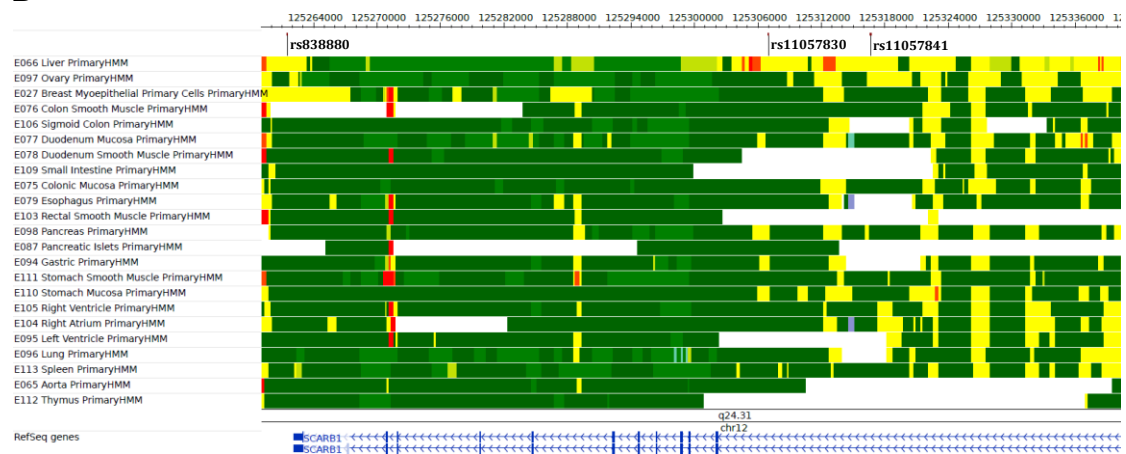

**Supplementary Figure 8** Association of the PROCR gene region. (a) with CAD (b) with *PROCR* expression QTLs in subcutaneous adipose tissue from MuTHER (c) *PROCR* expression QTLs in skin tissue from MuTHER (d) CAD-association of the *PROCR* region conditional on the sentinel SNP, rs867186 (e) *GGT7* expression QTLs in subcutaneous adipose tissue from MuTHER (f) *GGT7* expression QTLs in skin tissue from MuTHER. Physical position is given for GRCh37.  $r^2$  is calculated using 1000G EUR samples and reported relative to the sentinel CAD SNP, rs867186, in (a), (b) & (c) and to the second CAD-associated SNP, rs6088590, in (d), (e) and (f).

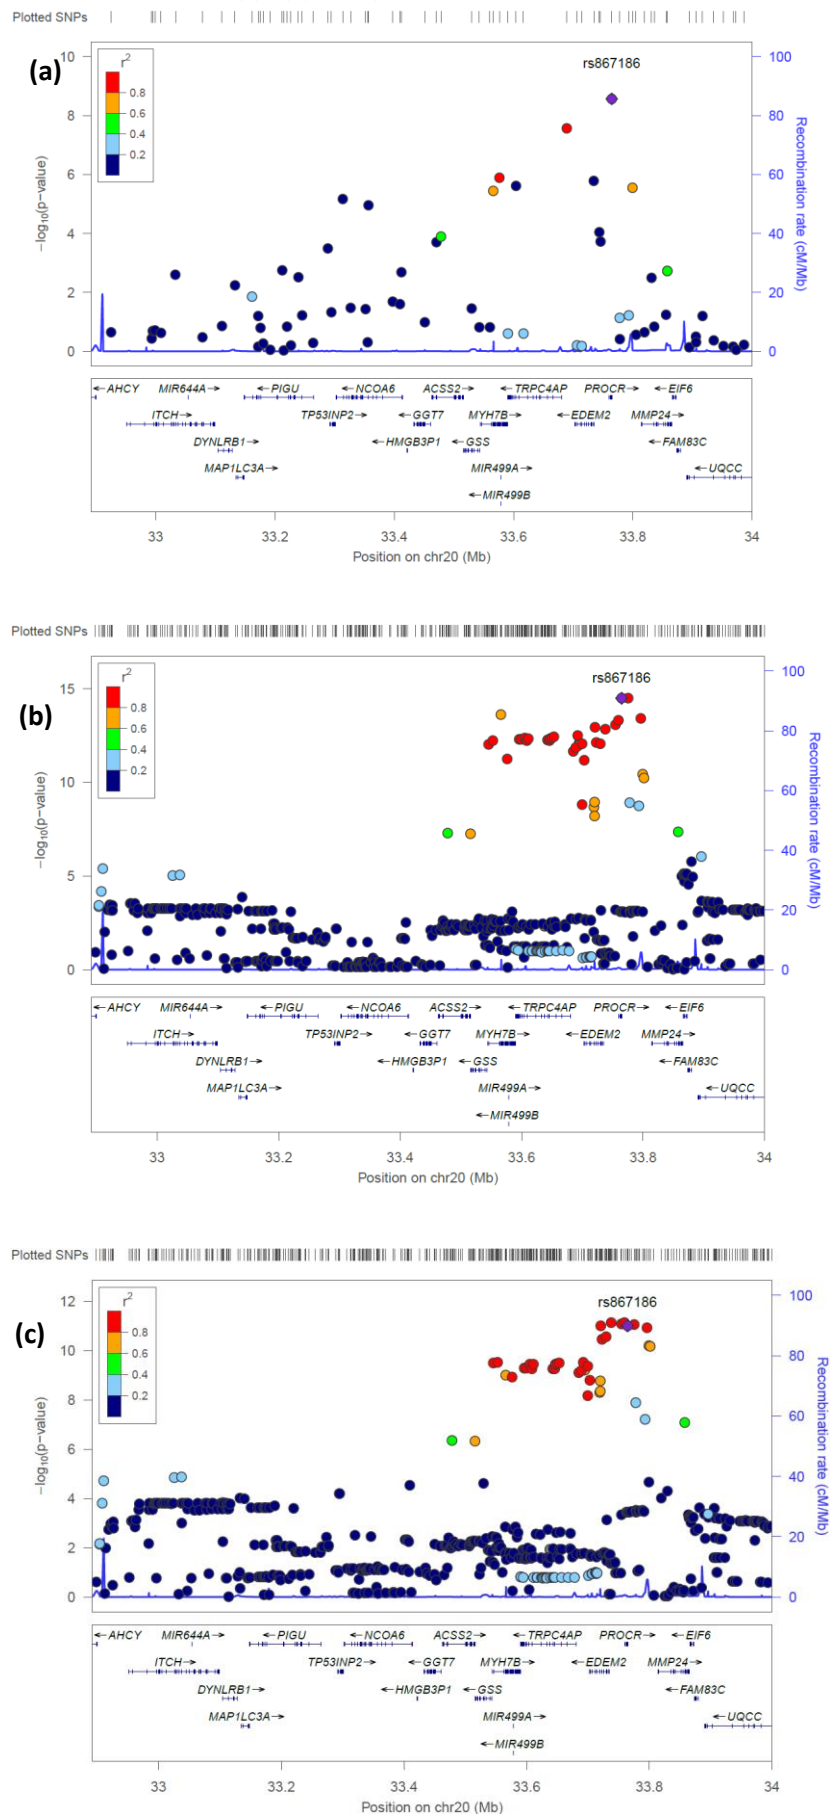

(d)

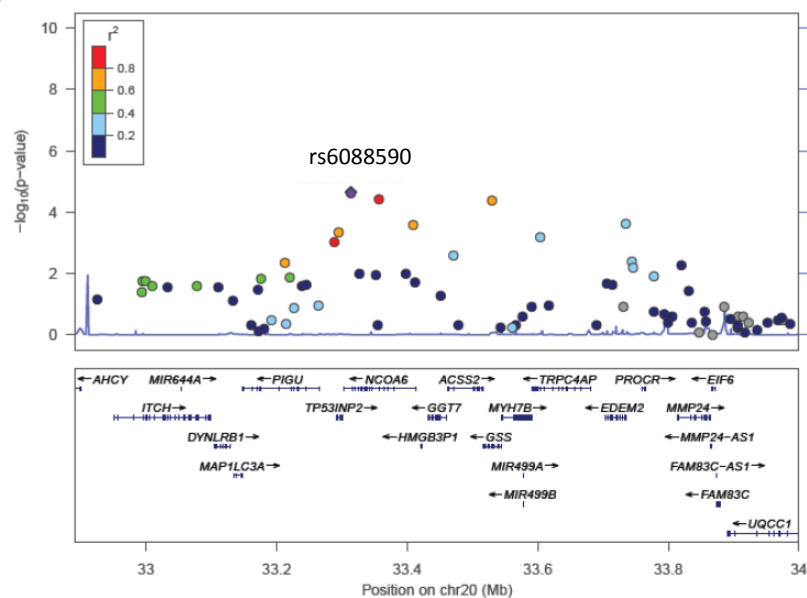

(e)

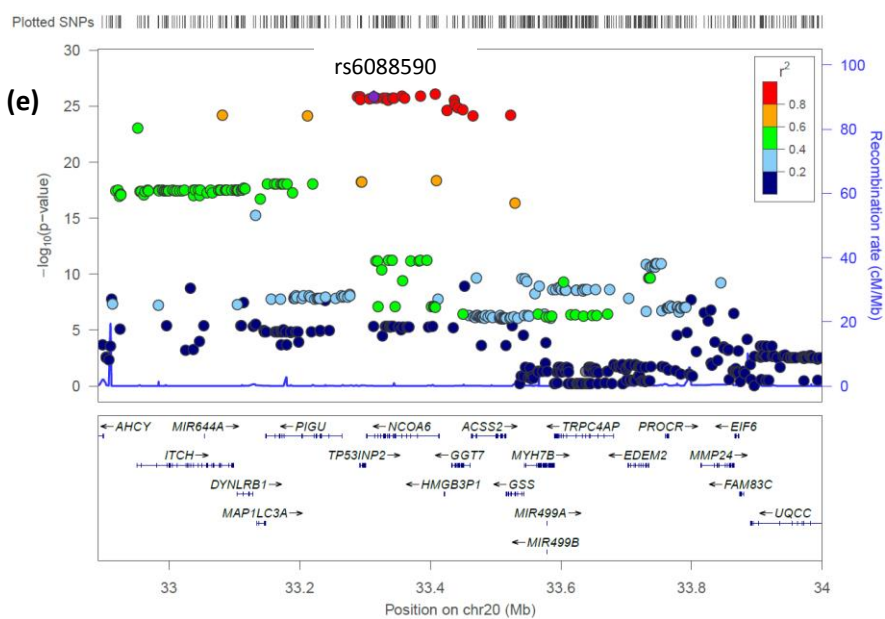

Plotted SNPs

(f)

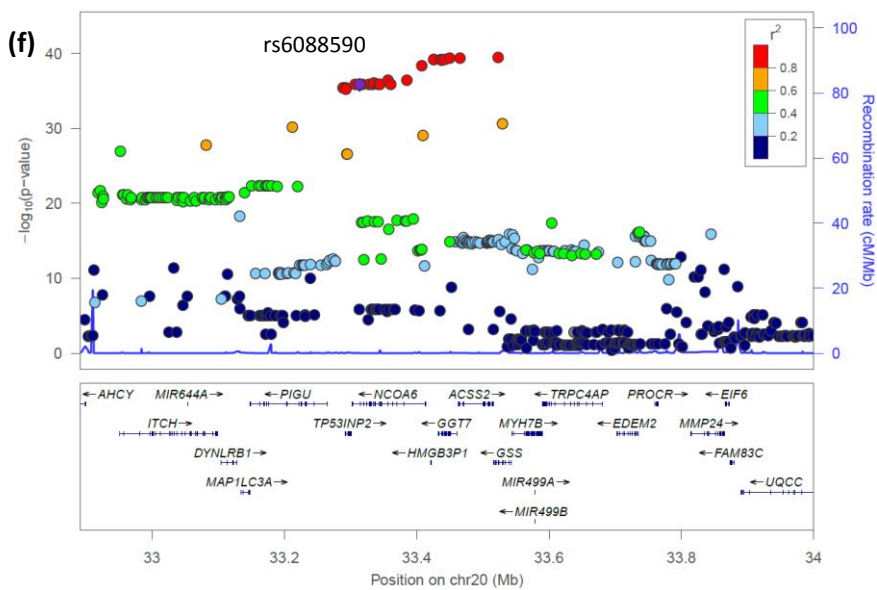

Supplement: NIHMS73649-supplement-Supplementary_Information.pdf [file NIHMS73649-supplement-Supplementary_Information.pdf]
